# Supplementary material for: The phosphorescence properties of a series of diarylethene-containing platinum complexes: the effect of ligand photoisomerization
Source: Royal Society of Chemistry journal article supplement (doi:10.1039/c7qo00476a), 2017-01-01
Supplement: c7qo00476a1.pdf [file c7qo00476a1.pdf]

Supplementary Information for

**The phosphorescent properties of a series of diarylethene-containing platinum complexes: the effect of ligand photoisomerization**

Zhi-xiang Zhang, Wei Wei, Fu-quan Bai\*, Shamsa BiBi, and Hong-xing Zhang\*

\* Key Laboratory of Theoretical and Computational Chemistry, International Joint Research Laboratory of Nano-Micro Architecture Chemistry, Institute of Theoretical Chemistry, Jilin University, Changchun 130023, People's-Republic of China.

E-mail: baifq@jlu.edu.cn, zhanghx@mail.jlu.edu.cn

## Contents

|                                                                                                                                                                                                                                 |    |
|---------------------------------------------------------------------------------------------------------------------------------------------------------------------------------------------------------------------------------|----|
| Table S1 Main geometry parameters for 1c–4c in the optimized $S_0$ and $T_1$ states .....                                                                                                                                       | 3  |
| Table S2 The calculated composition(percentage) of the selected frontier MOs for open and closed forms of 1-4 .....                                                                                                             | 4  |
| Table S3. The main transitions, oscillator strengths and vertical excitation energy(eV) of 1o .....                                                                                                                             | 5  |
| Table S4. The main transitions, oscillator strengths and vertical excitation energy(eV) of 2o .....                                                                                                                             | 6  |
| Table S5. The main transitions, oscillator strengths and vertical excitation energy(eV) of 3o .....                                                                                                                             | 7  |
| Table S6. The main transitions, oscillator strengths and vertical excitation energy(eV) of 4o .....                                                                                                                             | 8  |
| Table S7 SOC matrix elements $\langle T_m^a   H_{SOC}   S_n \rangle$ ( $\text{cm}^{-1}$ ) and the radiative decay rate rate ( $kr / \text{s}^{-1}$ ) of 1o calculated at the T1 optimized geometry.....                         | 9  |
| Table S8 SOC matrix elements $\langle T_m^a   H_{SOC}   S_n \rangle$ ( $\text{cm}^{-1}$ ) and the radiative decay rate rate ( $kr / \text{s}^{-1}$ ) of 2o calculated at the T1 optimized geometry.....                         | 10 |
| Table S9 SOC matrix elements $\langle T_m^a   H_{SOC}   S_n \rangle$ ( $\text{cm}^{-1}$ ) and the radiative decay rate rate ( $kr / \text{s}^{-1}$ ) of 3o calculated at the T1 optimized geometry.....                         | 11 |
| Table S10 SOC matrix elements $\langle T_m^a   H_{SOC}   S_n \rangle$ ( $\text{cm}^{-1}$ ) and the radiative decay rate rate ( $kr / \text{s}^{-1}$ ) of 4o calculated at the T1 optimized geometry.....                        | 12 |
| Table S11 Main optimized geometry parameters for ${}^3\text{MC}$ in 1o-4o.. .....                                                                                                                                               | 13 |
| Table S12. Main geometry parameters for 5, 6 in the optimized $S_0$ and $T_1$ states. Rc represents the distance between two reactive C atoms on DTE.....                                                                       | 14 |
| Table S13. Electron transition configurations, excitation energies, oscillator strengths ( $f$ ), and assignment for absorption and emission bands of isomers in 5, 6.....                                                      | 15 |
| Table S14 SOC matrix elements $\langle T_m^a   H_{SOC}   S_n \rangle$ ( $\text{cm}^{-1}$ ) and the radiative decay rate rate ( $kr / \text{s}^{-1}$ ) of 5o calculated at the T1 optimized geometry.....                        | 16 |
| Table S15 SOC matrix elements $\langle T_m^a   H_{SOC}   S_n \rangle$ ( $\text{cm}^{-1}$ ) and the radiative decay rate rate ( $kr / \text{s}^{-1}$ ) of 6o calculated at the T1 optimized geometry.....                        | 17 |
| Table S16. The relative energies of ${}^3\text{ESo}$ , ${}^3\text{MC}$ , ${}^3\text{ESc}$ state and the energy barriers in nonradiative decay process of 5 and 6. Ground state of open-ring form is treated as zero point. .... | 18 |
| Fig. S1 The selected molecular orbitals in 1o, 2o(n=5) and 3o, 4o(n=6) .....                                                                                                                                                    | 19 |
| Fig. S2 The selected molecular orbitals in 1c-4c.....                                                                                                                                                                           | 20 |
| Fig. S3 Calculated energy levels of molecular orbitals and energy gaps(eV) between HOMO(orange) and LUMO(blue) in 1-4.....                                                                                                      | 21 |
| Fig. S4 The selected molecular orbitals and spin population distribution in each isomer of 5(n=5), 6(n=4). .....                                                                                                                | 22 |
| Fig. S5 Calculated energy levels of molecular orbitals and energy gaps(eV) between HOMO(orange) and LUMO(blue) in 5, 6. ....                                                                                                    | 23 |
| Cartesian coordinates of the optimized geometries .....                                                                                                                                                                         | 24 |

Table S1 Main geometry parameters for **1c–4c** in the optimized S<sub>0</sub> and T<sub>1</sub> states

|                                                   | <b>1c</b>      |                | <b>2c</b>      |                | <b>3c</b>      |                | <b>4c</b>      |                |
|---------------------------------------------------|----------------|----------------|----------------|----------------|----------------|----------------|----------------|----------------|
|                                                   | S <sub>0</sub> | T <sub>1</sub> |
| Bond [Å]                                          |                |                |                |                |                |                |                |                |
| Pt-N <sub>1</sub>                                 | 2.010          | 2.014          | 2.009          | 2.013          | 2.018          | 2.019          | 2.015          | 2.017          |
| Pt-O <sub>2</sub>                                 | 2.103          | 2.107          | 2.097          | 2.102          | 2.102          | 2.104          | 2.104          | 2.094          |
| Pt-O <sub>3</sub>                                 | 2.021          | 2.018          | 2.019          | 2.016          | 2.014          | 2.016          | 2.015          | 2.014          |
| Pt-C <sub>4</sub>                                 | 1.997          | 1.984          | 1.993          | 1.982          | 1.964          | 1.959          | 1.964          | 1.959          |
| C <sub>4</sub> -C <sub>5</sub>                    | 1.379          | 1.401          | 1.393          | 1.405          | 1.390          | 1.392          | 1.394          | 1.397          |
| C <sub>5</sub> -C <sub>6</sub>                    | 1.429          | 1.422          | 1.422          | 1.416          | 1.431          | 1.427          | 1.430          | 1.420          |
| C <sub>4</sub> -C <sub>7</sub>                    | 1.449          | 1.416          | 1.445          | 1.412          | 1.413          | 1.407          | 1.409          | 1.404          |
| C <sub>7</sub> -C <sub>8</sub>                    | 1.472          | 1.419          | 1.471          | 1.422          | 1.466          | 1.411          | 1.463          | 1.413          |
| Rc                                                | 1.530          | 1.563          | 1.530          | 1.563          | 1.533          | 1.562          | 1.533          | 1.562          |
| Angle [deg.]                                      |                |                |                |                |                |                |                |                |
| N <sub>1</sub> -Pt-O <sub>2</sub>                 | 91.0           | 91.8           | 90.8           | 91.5           | 93.6           | 94.0           | 93.8           | 93.1           |
| O <sub>2</sub> -Pt-O <sub>3</sub>                 | 89.9           | 90.5           | 90.2           | 91.7           | 91.8           | 91.7           | 91.8           | 92.0           |
| O <sub>3</sub> -Pt-C <sub>4</sub>                 | 97.6           | 96.2           | 97.6           | 96.3           | 93.6           | 93.3           | 93.4           | 92.9           |
| N <sub>1</sub> -Pt-C <sub>4</sub>                 | 81.3           | 81.5           | 81.2           | 81.4           | 81.1           | 81.0           | 80.9           | 82.2           |
| Dihedral [deg.]                                   |                |                |                |                |                |                |                |                |
| O <sub>3</sub> -Pt-C <sub>4</sub> -C <sub>7</sub> | 10.9           | 7.0            | 12.1           | 8.1            | 0.5            | 0.1            | 0.2            | 0.1            |
| O <sub>2</sub> -Pt-N <sub>1</sub> -C <sub>6</sub> | 168.0          | 173.0          | 174.1          | 172.5          | 180.0          | 179.9          | 179.7          | 179.4          |
| Pt-O <sub>2</sub> -O <sub>3</sub> -C <sub>9</sub> | 180.0          | 180.0          | 178.5          | 179.4          | 179.8          | 179.9          | 179.8          | 179.9          |

Table S2 The calculated composition(percentage) of the selected frontier MOs for open and closed

forms of 1-4

|           |     | acac | Pt | thpy/tthpy | DTE |
|-----------|-----|------|----|------------|-----|
| <b>1c</b> | L   | 1    | 2  | 26         | 71  |
|           | H   | 1    | 0  | 27         | 72  |
|           | H-1 | 6    | 23 | 46         | 25  |
| <b>1o</b> | L+3 | 1    | 2  | 21         | 76  |
|           | L   | 2    | 7  | 85         | 6   |
|           | H   | 5    | 22 | 56         | 17  |
|           | H-1 | 3    | 10 | 21         | 66  |
| <b>2c</b> | H-5 | 4    | 88 | 5          | 3   |
|           | L   | 1    | 2  | 31         | 66  |
|           | H   | 0    | 0  | 33         | 67  |
|           | H-1 | 6    | 23 | 45         | 26  |
| <b>2o</b> | L+3 | 1    | 1  | 31         | 67  |
|           | L   | 1    | 6  | 85         | 8   |
|           | H   | 1    | 6  | 41         | 52  |
|           | H-1 | 4    | 10 | 26         | 60  |
|           | H-5 | 4    | 88 | 6          | 2   |
| <b>3c</b> | L   | 0    | 1  | 29         | 70  |
|           | H   | 0    | 0  | 25         | 75  |
|           | H-1 | 2    | 13 | 52         | 33  |
| <b>3o</b> | L+3 | 1    | 2  | 43         | 54  |
|           | L   | 1    | 7  | 86         | 6   |
|           | H   | 1    | 8  | 69         | 22  |
|           | H-1 | 10   | 22 | 38         | 30  |
|           | H-6 | 2    | 91 | 1          | 6   |
| <b>4c</b> | L   | 1    | 2  | 31         | 66  |
|           | H   | 0    | 0  | 33         | 67  |
|           | H-1 | 6    | 23 | 45         | 26  |
| <b>4o</b> | L+3 | 0    | 2  | 29         | 69  |
|           | L   | 1    | 6  | 84         | 9   |
|           | H   | 1    | 8  | 39         | 52  |
|           | H-1 | 7    | 23 | 35         | 35  |
|           | H-6 | 1    | 92 | 0          | 7   |

Table S3. The main transitions, oscillator strengths and vertical excitation energy(eV) of **1o**

| State           | Transition(CI) | Energy | <i>f</i> |
|-----------------|----------------|--------|----------|
| T <sub>1</sub>  | H→L (0.68)     | 1.76   | -        |
| S <sub>2</sub>  | H-1→L (0.63)   | 3.68   | 0.1760   |
| S <sub>3</sub>  | H-2→L (0.20)   | 4.01   | 0.0525   |
| S <sub>4</sub>  | H-2→L (0.54)   | 4.13   | 0.1123   |
|                 | H-3→L (-0.20)  |        |          |
| S <sub>5</sub>  | H-5→L (0.63)   | 4.20   | 0.0254   |
| S <sub>6</sub>  | H-6→L (-0.24)  | 4.32   | 0.0297   |
|                 | H-3→L (0.31)   |        |          |
| S <sub>7</sub>  | H-6→L (-0.20)  | 4.38   | 0.0161   |
|                 | H-3→L (0.28)   |        |          |
|                 | H-5→L (0.25)   |        |          |
| S <sub>9</sub>  | H-3→L(-0.37)   | 4.52   | 0.1245   |
|                 | H-4→L (0.45)   |        |          |
| S <sub>10</sub> | H-4→L (-0.20)  | 4.62   | 0.0626   |

Table S4. The main transitions, oscillator strengths and vertical excitation energy(eV) of **2o**

| State          | Transition(Cl) | Energy | <i>f</i> |
|----------------|----------------|--------|----------|
| T <sub>1</sub> | H→L (0.67)     | 1.75   | -        |
| S <sub>2</sub> | H-1→L (0.63)   | 3.51   | 0.1727   |
| S <sub>3</sub> | H-2→L (0.49)   | 3.93   | 0.0510   |
|                | H-8→L (0.18)   |        |          |
| S <sub>4</sub> | H-2→L (-0.35)  | 4.02   | 0.1178   |
|                | H-5→L (0.18)   |        |          |
| S <sub>5</sub> | H-6→L (0.23)   | 4.05   | 0.0190   |
|                | H-5→L (0.59)   |        |          |
| S <sub>6</sub> | H-6→L (0.31)   | 4.19   | 0.0545   |
|                | H-3→L (0.47)   |        |          |
|                | H-8→L (0.18)   |        |          |
|                | H-2→L (-0.19)  |        |          |
| S <sub>7</sub> | H-4→L (0.37)   | 4.38   | 0.0549   |
| S <sub>8</sub> | H-4→L (0.34)   | 4.39   | 0.0702   |

Table S5. The main transitions, oscillator strengths and vertical excitation energy(eV) of **3o**

| State           | Transition(CI) | Energy | <i>f</i> |
|-----------------|----------------|--------|----------|
| T <sub>1</sub>  | H→L (0.68)     | 1.71   | -        |
| S <sub>2</sub>  | H-1→L (0.49)   | 3.77   | 0.6943   |
|                 | H-2→L (0.20)   |        |          |
| S <sub>3</sub>  | H-2→L (0.50)   | 3.94   | 0.2318   |
| S <sub>4</sub>  | H-2→L (0.35)   | 4.08   | 0.0.01   |
|                 | H-1→L (-0.33)  |        |          |
| S <sub>5</sub>  | H-6→L (0.45)   | 4.25   | 0.0968   |
|                 | H-3→L (-0.38)  |        |          |
| S <sub>6</sub>  | H-6→L (0.49)   | 4.27   | 0.0821   |
|                 | H-3→L (0.31)   |        |          |
| S <sub>10</sub> | H-5→L (0.20)   | 4.60   | 0.0205   |
|                 | H-3→L (0.30)   |        |          |

Table S6. The main transitions, oscillator strengths and vertical excitation energy(eV) of **4o**

| State           | Transition(Cl) | Energy | <i>f</i> |
|-----------------|----------------|--------|----------|
| T <sub>1</sub>  | H→L (0.68)     | 1.71   | -        |
| S <sub>2</sub>  | H-1→L (0.53)   | 3.66   | 0.3394   |
|                 | H-2→L (0.28)   |        |          |
| S <sub>3</sub>  | H-2→L (0.52)   | 3.85   | 0.1665   |
| S <sub>4</sub>  | H-3→L (-0.22)  | 3.98   | 0.0089   |
|                 | H-2→L (0.23)   |        |          |
|                 | H-1→L (-0.28)  |        |          |
| S <sub>5</sub>  | H-6→L (0.65)   | 4.12   | 0.0206   |
| S <sub>6</sub>  | H-6→L (0.54)   | 4.15   | 0.2073   |
|                 | H-3→L (0.49)   |        |          |
|                 | H-1→L (0.23)   |        |          |
| S <sub>9</sub>  | H-3→L (-0.20)  | 4.47   | 0.0179   |
| S <sub>10</sub> | H-3→L (-0.21)  | 4.52   | 0.0756   |



Table S7 SOC matrix elements  $\langle T_m^\alpha | H_{\text{SOC}} | S_n \rangle$  ( $\text{cm}^{-1}$ ) and the radiative decay rate rate ( $k_r / \text{s}^{-1}$ ) of **1o**

calculated at the T1 optimized geometry

|                 | $\langle T_1^x   H_{\text{SOC}}   S_n \rangle$ | $\langle T_1^y   H_{\text{SOC}}   S_n \rangle$ | $\langle T_1^z   H_{\text{SOC}}   S_n \rangle$ |
|-----------------|------------------------------------------------|------------------------------------------------|------------------------------------------------|
| S <sub>1</sub>  |                                                |                                                |                                                |
| S <sub>2</sub>  | 18.00                                          |                                                |                                                |
| S <sub>3</sub>  | -10.28                                         |                                                | 10.30                                          |
| S <sub>4</sub>  | 51.71                                          |                                                | 29.03                                          |
| S <sub>5</sub>  | -55.57                                         |                                                | -254.83                                        |
| S <sub>6</sub>  | 14.00                                          |                                                | -24.73                                         |
| S <sub>7</sub>  | -8.86                                          |                                                | -94.68                                         |
| S <sub>8</sub>  |                                                |                                                |                                                |
| S <sub>9</sub>  | 6.63                                           |                                                |                                                |
| S <sub>10</sub> | -10.86                                         |                                                |                                                |
| $k_r^\alpha$    | 108.22                                         |                                                | 691.44                                         |
| $k_r$           |                                                | 266.55                                         |                                                |

Table S8 SOC matrix elements  $\langle T_m^\alpha | H_{\text{SOC}} | S_n \rangle$  ( $\text{cm}^{-1}$ ) and the radiative decay rate rate ( $k_r / \text{s}^{-1}$ ) of **2o**

calculated at the T1 optimized geometry

|                 | $\langle T_1^x   H_{\text{SOC}}   S_n \rangle$ | $\langle T_1^y   H_{\text{SOC}}   S_n \rangle$ | $\langle T_1^z   H_{\text{SOC}}   S_n \rangle$ |
|-----------------|------------------------------------------------|------------------------------------------------|------------------------------------------------|
| S <sub>1</sub>  |                                                |                                                |                                                |
| S <sub>2</sub>  | 30.59                                          |                                                |                                                |
| S <sub>3</sub>  | -65.26                                         |                                                | 16.80                                          |
| S <sub>4</sub>  | 17.94                                          |                                                | -79.27                                         |
| S <sub>5</sub>  | -46.33                                         |                                                | -267.68                                        |
| S <sub>6</sub>  | 41.81                                          |                                                | -84.93                                         |
| S <sub>7</sub>  | 11.30                                          |                                                |                                                |
| S <sub>8</sub>  | 10.14                                          |                                                |                                                |
| S <sub>9</sub>  |                                                |                                                |                                                |
| S <sub>10</sub> |                                                |                                                |                                                |
| $k_r^\alpha$    | 47.04                                          |                                                | 3329                                           |
| $k_r$           |                                                | 1125.35                                        |                                                |

Table S9 SOC matrix elements  $\langle T_m^\alpha | H_{\text{SOC}} | S_n \rangle$  ( $\text{cm}^{-1}$ ) and the radiative decay rate rate ( $k_r / \text{s}^{-1}$ ) of **3o**

calculated at the T1 optimized geometry

|                 | $\langle T_1^x   H_{\text{SOC}}   S_n \rangle$ | $\langle T_1^y   H_{\text{SOC}}   S_n \rangle$ | $\langle T_1^z   H_{\text{SOC}}   S_n \rangle$ |
|-----------------|------------------------------------------------|------------------------------------------------|------------------------------------------------|
| S <sub>1</sub>  |                                                |                                                |                                                |
| S <sub>2</sub>  | -27.50                                         |                                                |                                                |
| S <sub>3</sub>  | -22.19                                         |                                                |                                                |
| S <sub>4</sub>  | -3.26                                          |                                                |                                                |
| S <sub>5</sub>  | 44.52                                          |                                                | -168.07                                        |
| S <sub>6</sub>  | -16.68                                         |                                                | -181.97                                        |
| S <sub>7</sub>  |                                                |                                                |                                                |
| S <sub>8</sub>  |                                                |                                                |                                                |
| S <sub>9</sub>  |                                                |                                                |                                                |
| S <sub>10</sub> | -19.24                                         |                                                |                                                |
| $k_r^\alpha$    | 363.63                                         |                                                | 2953.04                                        |
| $k_r$           |                                                | 1105.35                                        |                                                |

Table S10 SOC matrix elements  $\langle T_m^\alpha | H_{\text{SOC}} | S_n \rangle$  ( $\text{cm}^{-1}$ ) and the radiative decay rate rate ( $k_r / \text{s}^{-1}$ ) of **4o**

calculated at the T1 optimized geometry

|                 | $\langle T_1^x   H_{\text{SOC}}   S_n \rangle$ | $\langle T_1^y   H_{\text{SOC}}   S_n \rangle$ | $\langle T_1^z   H_{\text{SOC}}   S_n \rangle$ |
|-----------------|------------------------------------------------|------------------------------------------------|------------------------------------------------|
| S <sub>1</sub>  |                                                |                                                |                                                |
| S <sub>2</sub>  | -36.39                                         |                                                |                                                |
| S <sub>3</sub>  | -23.88                                         |                                                |                                                |
| S <sub>4</sub>  | -39.28                                         |                                                |                                                |
| S <sub>5</sub>  | -15.10                                         |                                                | -253.84                                        |
| S <sub>6</sub>  | 12.57                                          |                                                | -212.06                                        |
| S <sub>7</sub>  |                                                |                                                |                                                |
| S <sub>8</sub>  |                                                |                                                |                                                |
| S <sub>9</sub>  | -14.00                                         |                                                |                                                |
| S <sub>10</sub> | -15.35                                         |                                                |                                                |
| $k_r^\alpha$    | 557.66                                         |                                                | 5416.01                                        |
| $k_r$           |                                                | 1991.22                                        |                                                |

Table S11 Main optimized geometry parameters for <sup>3</sup>MC in **1o-4o**..

| Item                                              | 1o    | 2o    | 3o    | 4o    |
|---------------------------------------------------|-------|-------|-------|-------|
| Bond (Å)                                          |       |       |       |       |
| Pt-N <sub>1</sub>                                 | 2.264 | 2.254 | 2.253 | 2.247 |
| Pt-O <sub>2</sub>                                 | 2.130 | 2.134 | 2.122 | 2.121 |
| Pt-O <sub>3</sub>                                 | 2.207 | 2.205 | 1.211 | 2.208 |
| Pt-C <sub>4</sub>                                 | 1.998 | 1.996 | 1.997 | 1.997 |
| C <sub>4</sub> -C <sub>5</sub>                    | 1.383 | 1.386 | 1.387 | 1.391 |
| C <sub>5</sub> -C <sub>6</sub>                    | 1.443 | 1.438 | 1.442 | 1.436 |
| C <sub>4</sub> -C <sub>7</sub>                    | 1.430 | 1.428 | 1.415 | 1.414 |
| C <sub>7</sub> -C <sub>8</sub>                    | 1.387 | 1.389 | 1.386 | 1.386 |
| Rc                                                | 3.469 | 3.471 | 3.471 | 3.471 |
| Angle [deg.]                                      |       |       |       |       |
| N <sub>1</sub> -Pt-O <sub>2</sub>                 | 101.5 | 98.6  | 101.1 | 99.9  |
| O <sub>2</sub> -Pt-O <sub>3</sub>                 | 87.5  | 87.8  | 87.7  | 87.6  |
| O <sub>3</sub> -Pt-C <sub>4</sub>                 | 98.9  | 98.0  | 98.8  | 98.2  |
| N <sub>1</sub> -Pt-C <sub>4</sub>                 | 78.4  | 78.6  | 78.4  | 78.5  |
| Dihedral [deg.]                                   |       |       |       |       |
| O <sub>3</sub> -Pt-C <sub>4</sub> -C <sub>7</sub> | 92.6  | 90.5  | 95.3  | 95.49 |
| O <sub>2</sub> -Pt-N <sub>1</sub> -C <sub>6</sub> | 174.4 | 174.5 | 174.3 | 175.0 |
| Pt-O <sub>2</sub> -O <sub>3</sub> -C <sub>9</sub> | 171.0 | 170.8 | 170.5 | 168.5 |

Table S12. Main geometry parameters for **5**, **6** in the optimized S<sub>0</sub> and T<sub>1</sub> states. Rc represents the distance between two reactive C atoms on DTE.

|                                                   | <b>5o</b>      |                | <b>5c</b>      |                | <b>6o</b>      |                | <b>6c</b>      |                |
|---------------------------------------------------|----------------|----------------|----------------|----------------|----------------|----------------|----------------|----------------|
|                                                   | S <sub>0</sub> | T <sub>1</sub> |
| Bond [Å]                                          |                |                |                |                |                |                |                |                |
| Pt-N <sub>1</sub>                                 | 2.018          | 2.008          | 2.019          | 2.017          | 2.018          | 2.009          | 2.019          | 2.016          |
| Pt-O <sub>2</sub>                                 | 2.096          | 2.099          | 2.096          | 2.097          | 2.096          | 2.099          | 2.096          | 2.097          |
| Pt-O <sub>3</sub>                                 | 2.013          | 2.020          | 2.010          | 2.014          | 2.012          | 2.019          | 2.010          | 2.015          |
| Pt-C <sub>4</sub>                                 | 1.957          | 1.944          | 1.960          | 1.959          | 1.957          | 1.947          | 1.960          | 1.959          |
| C <sub>4</sub> -C <sub>5</sub>                    | 1.391          | 1.464          | 1.395          | 1.397          | 1.391          | 1.459          | 1.395          | 1.402          |
| C <sub>5</sub> -C <sub>6</sub>                    | 1.425          | 1.398          | 1.426          | 1.419          | 1.426          | 1.399          | 1.425          | 1.416          |
| C <sub>4</sub> -C <sub>7</sub>                    | 1.413          | 1.376          | 1.410          | 1.404          | 1.413          | 1.372          | 1.410          | 1.377          |
| C <sub>7</sub> -C <sub>8</sub>                    | 1.389          | 1.423          | 1.472          | 1.414          | 1.391          | 1.433          | 1.478          | 1.429          |
| Rc                                                | 3.475          | 3.428          | 1.538          | 1.576          | 3.494          | 3.439          | 1.544          | 1.585          |
| Angle [deg.]                                      |                |                |                |                |                |                |                |                |
| N <sub>1</sub> -Pt-O <sub>2</sub>                 | 93.5           | 92.9           | 93.4           | 93.4           | 93.0           | 93.5           | 93.4           | 93.5           |
| O <sub>2</sub> -Pt-O <sub>3</sub>                 | 91.9           | 91.9           | 91.8           | 91.8           | 91.9           | 91.7           | 91.8           | 91.8           |
| O <sub>3</sub> -Pt-C <sub>4</sub>                 | 93.8           | 93.0           | 93.8           | 93.7           | 93.0           | 92.5           | 93.8           | 93.6           |
| N <sub>1</sub> -Pt-C <sub>4</sub>                 | 80.8           | 82.2           | 81.0           | 81.0           | 82.1           | 82.2           | 81.0           | 81.0           |
| Dihedral [deg.]                                   |                |                |                |                |                |                |                |                |
| O <sub>3</sub> -Pt-C <sub>4</sub> -C <sub>7</sub> | 0.5            | 0.4            | 1.2            | 0.3            | 0.6            | 0.7            | 0.8            | 0.3            |
| O <sub>2</sub> -Pt-N <sub>1</sub> -C <sub>6</sub> | 179.3          | 179.8          | 180.0          | 179.2          | 179.5          | 179.8          | 180.0          | 179.3          |
| Pt-O <sub>2</sub> -O <sub>3</sub> -C <sub>9</sub> | 179.8          | 179.7          | 179.5          | 179.8          | 179.7          | 179.6          | 179.3          | 179.8          |

Table S13. Electron transition configurations, excitation energies, oscillator strengths ( $f$ ), andassignment for absorption and emission bands of isomers in **5**, **6**.

|           | State          | Major contrib. <sup>a</sup>      | Energy(nm/eV) | $f$    | Assignment                           |
|-----------|----------------|----------------------------------|---------------|--------|--------------------------------------|
| <b>5o</b> | T <sub>1</sub> | H→L (90.1%)<br>H-1→L (5.7%)      | 724/1.71      | -      | <sup>3</sup> LLCT/ <sup>3</sup> MLCT |
|           | S <sub>1</sub> | H→L (91.5%)<br>H-1→L (3.3%)      | 448/2.76      | 0.4483 | LLCT/MLCT                            |
|           | S <sub>2</sub> | H-1→L (85.4%)<br>H→L (5.0%)      | 377/3.28      | 0.0986 | LLCT/MLCT                            |
|           | S <sub>9</sub> | H→L+3 (60.7%)<br>H-1→L+1 (29.1%) | 272/4.55      | 0.0320 | ILCT/LLCT                            |
| <b>5c</b> | T <sub>1</sub> | H→L (74.5%)<br>H→L+1 (20.7%)     | 2721/0.45     | -      | <sup>3</sup> ILCT/ <sup>3</sup> LLCT |
|           | S <sub>1</sub> | H→L (99.2%)                      | 639/1.94      | 0.1409 | ILCT/LLCT                            |
|           | S <sub>3</sub> | H-1→L (89.6%)                    | 432/2.87      | 0.2334 | LLCT/MLCT                            |
| <b>6o</b> | T <sub>1</sub> | H→L (90.6%)<br>H→L (4.2%)        | 752/1.65      | -      | <sup>3</sup> LLCT/ <sup>3</sup> MLCT |
|           | S <sub>1</sub> | H→L (92.6%)<br>H-1→L (2.5%)      | 455/2.73      | 0.5370 | LLCT/MLCT                            |
|           | S <sub>2</sub> | H-1→L (85.5%)<br>H→L (4.1%)      | 384/3.23      | 0.1233 | LLCT/MLCT                            |
|           | S <sub>8</sub> | H→L+3 (80.3%)<br>H-1→L+2 (9.0%)  | 316/3.93      | 0.0737 | ILCT/LLCT                            |
| <b>6c</b> | T <sub>1</sub> | H→L (77.02%)<br>H→L+1 (15.08%)   | 5001/0.25     | -      | <sup>3</sup> ILCT/ <sup>3</sup> LLCT |
|           | S <sub>1</sub> | H→L (99.0%)                      | 616/2.01      | 0.2123 | ILCT/LLCT                            |
|           | S <sub>2</sub> | H→L+1 (72.4%)<br>H-1→L (19.9%)   | 437/2.84      | 0.1738 | LLCT/MLCT                            |
|           | S <sub>3</sub> | H-1→L (72.4%)<br>H→L+1 (19.0%)   | 426/2.91      | 0.1337 | LLCT/MLCT                            |

Table S14 SOC matrix elements  $\langle T_m^\alpha | H_{\text{SOC}} | S_n \rangle$  ( $\text{cm}^{-1}$ ) and the radiative decay rate rate ( $k_r / \text{s}^{-1}$ ) of **5o**

calculated at the T1 optimized geometry

|                 | $\langle T_1^x   H_{\text{SOC}}   S_n \rangle$ | $\langle T_1^y   H_{\text{SOC}}   S_n \rangle$ | $\langle T_1^z   H_{\text{SOC}}   S_n \rangle$ |
|-----------------|------------------------------------------------|------------------------------------------------|------------------------------------------------|
| S <sub>1</sub>  |                                                |                                                |                                                |
| S <sub>2</sub>  | -32.60                                         |                                                |                                                |
| S <sub>3</sub>  | -29.07                                         |                                                |                                                |
| S <sub>4</sub>  | -3.96                                          |                                                |                                                |
| S <sub>5</sub>  | 33.95                                          |                                                | -239.72                                        |
| S <sub>6</sub>  | 37.77                                          |                                                | -165.26                                        |
| S <sub>7</sub>  | -8.99                                          |                                                |                                                |
| S <sub>8</sub>  |                                                |                                                |                                                |
| S <sub>9</sub>  |                                                |                                                |                                                |
| S <sub>10</sub> | 18.46                                          |                                                |                                                |
| $k_r^\alpha$    | 105.84                                         |                                                | 4662.09                                        |
| $k_r$           |                                                | 1589.31                                        |                                                |



Table S15 SOC matrix elements  $\langle T_m^\alpha | H_{\text{SOC}} | S_n \rangle$  ( $\text{cm}^{-1}$ ) and the radiative decay rate rate ( $k_r / \text{s}^{-1}$ ) of **6o**

calculated at the T1 optimized geometry

|                 | $\langle T_1^x   H_{\text{SOC}}   S_n \rangle$ | $\langle T_1^y   H_{\text{SOC}}   S_n \rangle$ | $\langle T_1^z   H_{\text{SOC}}   S_n \rangle$ |
|-----------------|------------------------------------------------|------------------------------------------------|------------------------------------------------|
| S <sub>1</sub>  |                                                |                                                |                                                |
| S <sub>2</sub>  | -23.70                                         |                                                |                                                |
| S <sub>3</sub>  | -20.68                                         |                                                |                                                |
| S <sub>4</sub>  | -3.70                                          |                                                |                                                |
| S <sub>5</sub>  | -6.08                                          |                                                | -202.35                                        |
| S <sub>6</sub>  | -16.68                                         |                                                | -208.82                                        |
| S <sub>7</sub>  | -18.33                                         |                                                |                                                |
| S <sub>8</sub>  |                                                |                                                |                                                |
| S <sub>9</sub>  |                                                |                                                |                                                |
| S <sub>10</sub> |                                                |                                                | 17.71                                          |
| $k_r^\alpha$    | 310.61                                         |                                                | 5133.38                                        |
| $k_r$           |                                                | 1814.66                                        |                                                |

Table S16. The relative energies of  $^3\text{ESo}$ ,  $^3\text{MC}$ ,  $^3\text{ESc}$  state and the energy barriers in nonradiative decay

process of **5** and **6**. Ground state of open-ring form is treated as zero point.

|          | $^3\text{ESo}$ | $^3\text{MC}$ | $^3\text{ESc}$ | $\Delta E_1$ | $\Delta E_2$ | $\Delta E_3$ | $\Delta E_4$ |
|----------|----------------|---------------|----------------|--------------|--------------|--------------|--------------|
| <b>5</b> | 1.89           | 2.41          | 1.62           | 0.77         | 0.04         | 0.54         | 0.05         |
| <b>6</b> | 1.86           | 2.42          | 2.04           | 0.78         | 0.04         | 0.72         | 0.07         |

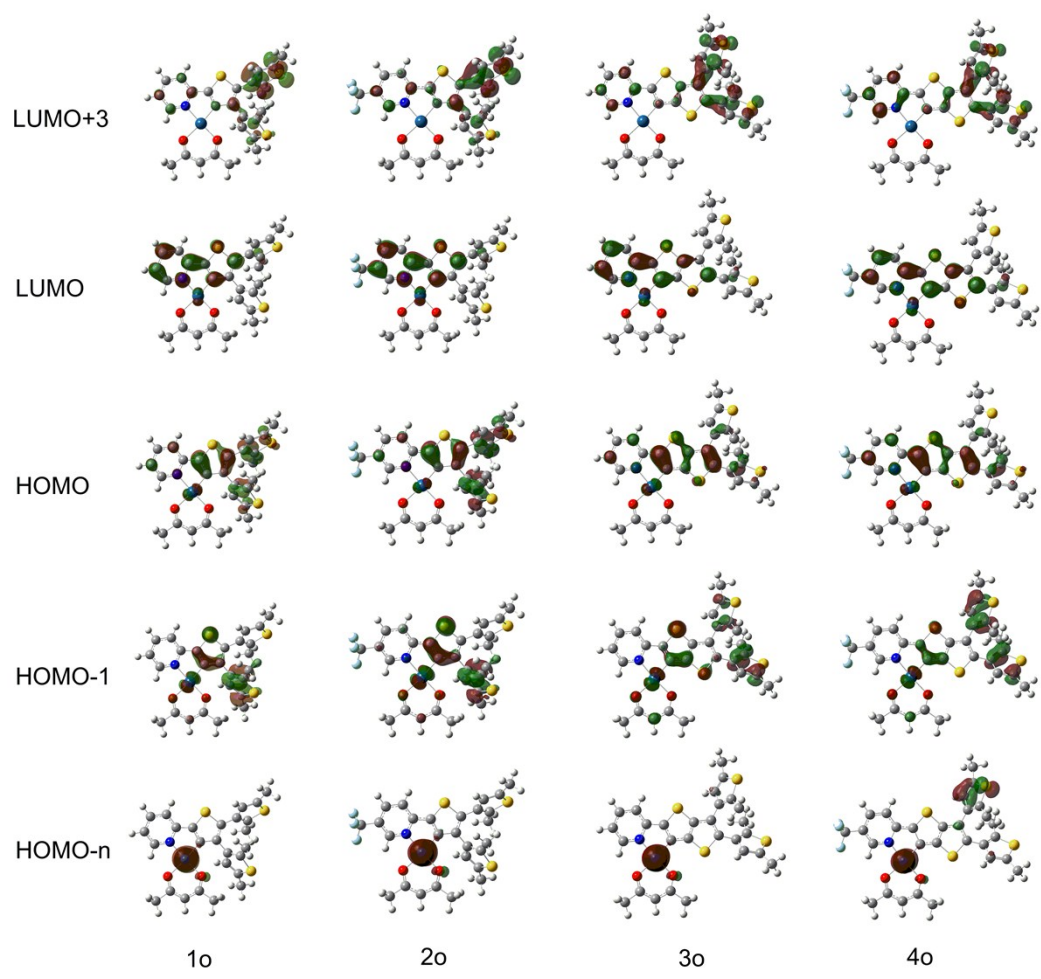

Fig. S1 The selected molecular orbitals in **1o**, **2o**(n=5) and **3o**, **4o**(n=6)

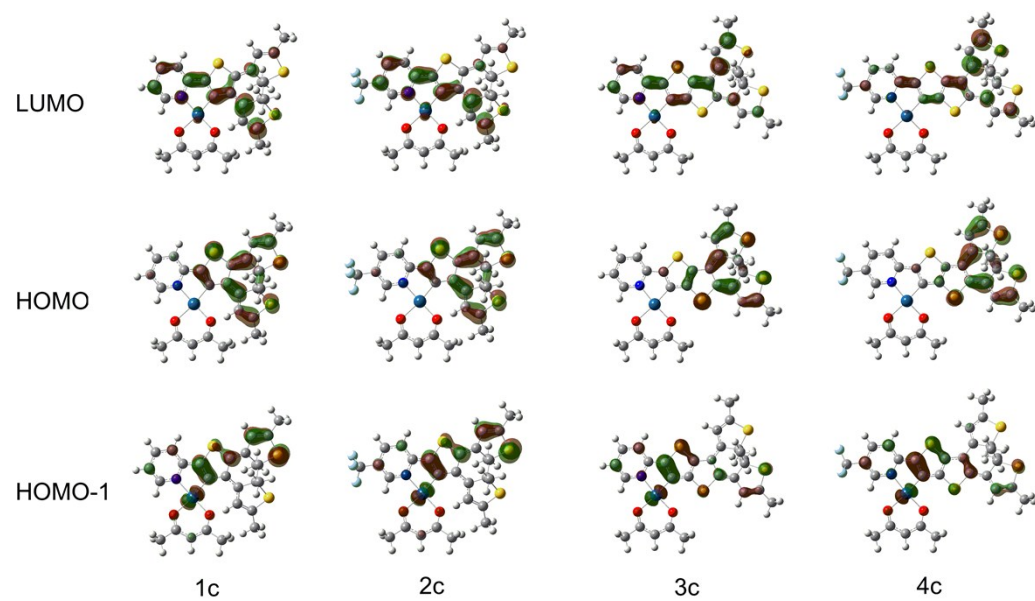

Fig. S2 The selected molecular orbitals in **1c-4c**.

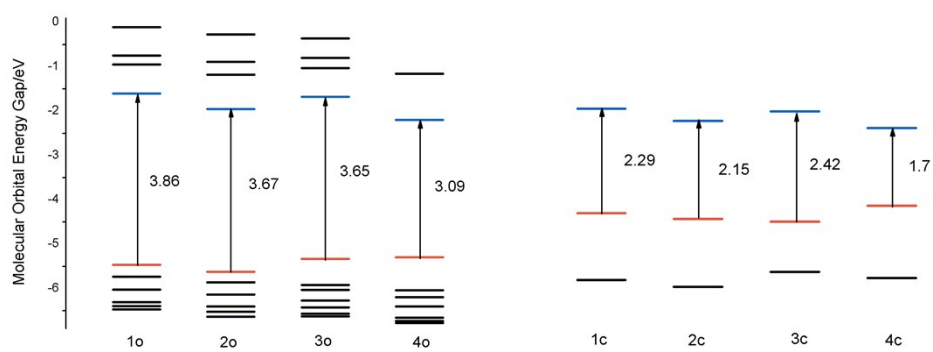

Fig. S3 Calculated energy levels of molecular orbitals and energy gaps(eV) between HOMO(orange)

and LUMO(blue) in **1-4**.

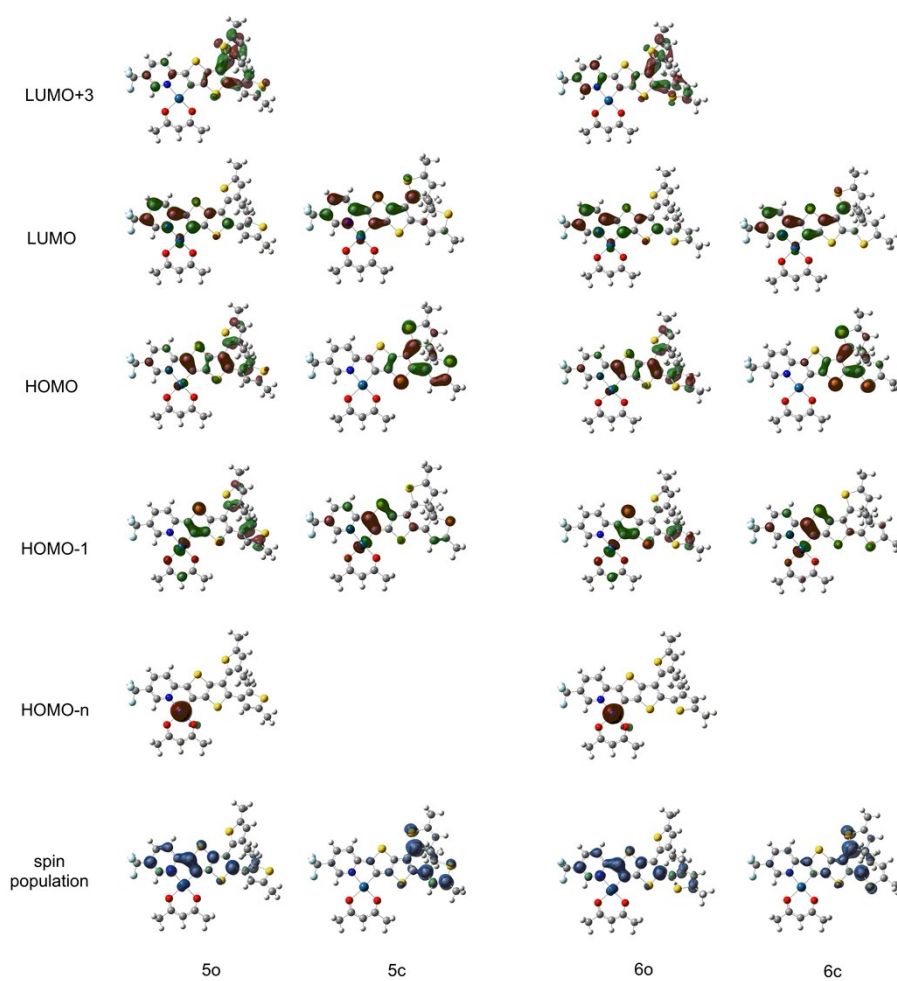

Fig. S4 The selected molecular orbitals and spin population distribution in each isomer of **5**( $n=5$ ), **6**( $n=4$ ).

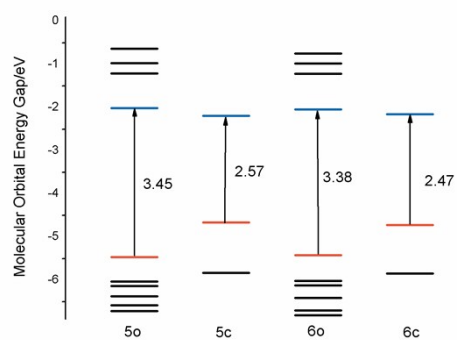

**Fig. S5** Calculated energy levels of molecular orbitals and energy gaps(eV) between HOMO(orange) and LUMO(blue) in **5, 6**.

## Cartesian coordinates of the optimized geometries

### 1-<sup>1</sup>GSo

|    |             |             |             |
|----|-------------|-------------|-------------|
| C  | -3.70212300 | -2.60547800 | 0.29500400  |
| H  | -4.49990800 | -1.87055900 | 0.27144300  |
| C  | -3.93607800 | -3.96640500 | 0.40400300  |
| H  | -4.95374700 | -4.33252100 | 0.47970800  |
| C  | -2.84309900 | -4.83481700 | 0.40946500  |
| H  | -2.99349900 | -5.90744700 | 0.48995200  |
| C  | -1.56077800 | -4.31992000 | 0.31164900  |
| H  | -0.69216300 | -4.97067500 | 0.31408500  |
| C  | -1.37971400 | -2.93732200 | 0.21018000  |
| C  | -0.14739000 | -2.21268700 | 0.12862700  |
| C  | -0.20070100 | -0.82769900 | 0.07674700  |
| C  | 1.11452500  | -0.25821600 | 0.07187700  |
| C  | 2.11198400  | -1.22528400 | 0.08851700  |
| C  | 2.90191700  | 1.31948600  | -1.99989000 |
| H  | 3.96575000  | 1.13329900  | -1.80643500 |
| H  | 2.82616900  | 2.01136100  | -2.84594500 |
| H  | 2.45025600  | 0.36734600  | -2.29293900 |
| C  | 2.20685500  | 1.85016300  | -0.79108500 |
| C  | 1.40247600  | 1.18682800  | 0.10072400  |
| C  | 0.91585700  | 2.04301000  | 1.14305800  |
| H  | 0.25023300  | 1.69141000  | 1.92484300  |
| C  | 1.36080500  | 3.32757200  | 1.06418600  |
| C  | 1.07444600  | 4.46927700  | 1.98365500  |
| H  | 0.62214800  | 5.32008600  | 1.45922300  |
| H  | 1.98272300  | 4.83662300  | 2.47660900  |
| H  | 0.37663200  | 4.14535400  | 2.76192700  |
| C  | 3.80964300  | 0.53178300  | 2.08440800  |
| H  | 3.68669000  | 1.58600900  | 1.80858200  |
| H  | 4.50224300  | 0.47764600  | 2.93108800  |
| H  | 2.83240100  | 0.16651100  | 2.41244800  |
| C  | 4.29046100  | -0.28485400 | 0.93332500  |
| C  | 3.56776000  | -1.07099800 | 0.06504100  |
| C  | 4.39998600  | -1.73637100 | -0.89719600 |
| H  | 4.00348500  | -2.39208800 | -1.66653500 |
| C  | 5.72647900  | -1.44646400 | -0.78051900 |
| C  | 6.86317600  | -1.93777600 | -1.61423400 |
| H  | 7.60040700  | -2.48676900 | -1.01652800 |
| H  | 7.38972800  | -1.11501500 | -2.11206000 |
| H  | 6.48616600  | -2.61337600 | -2.38791000 |
| C  | -6.04005900 | 1.64539600  | -0.37054000 |
| H  | -6.44821100 | 0.98320600  | -1.14206100 |
| H  | -6.38318000 | 2.66554100  | -0.55609600 |
| H  | -6.43611600 | 1.30321200  | 0.59202600  |
| C  | -4.53908400 | 1.52832500  | -0.35935000 |
| C  | -3.75905900 | 2.67255600  | -0.57909400 |
| H  | -4.28768300 | 3.60160200  | -0.75885100 |
| C  | -2.36023500 | 2.72848700  | -0.61003200 |
| C  | -1.67417900 | 4.03161400  | -0.91105300 |
| H  | -0.94924600 | 4.24154600  | -0.11857000 |
| H  | -2.37338800 | 4.86465200  | -1.00918200 |
| H  | -1.10084000 | 3.92754300  | -1.83894000 |
| N  | -2.46318600 | -2.10470700 | 0.20117500  |
| O  | -4.09933600 | 0.35292700  | -0.14892700 |
| O  | -1.54274700 | 1.76792600  | -0.41259000 |
| S  | 1.46364200  | -2.83778900 | 0.13159800  |
| S  | 2.37901300  | 3.51716400  | -0.33335300 |
| S  | 5.97642100  | -0.34621400 | 0.53956000  |
| Pt | -2.05393000 | -0.14384900 | -0.04404700 |

### 1-<sup>1</sup>GSc

|    |             |             |             |
|----|-------------|-------------|-------------|
| C  | 3.85589500  | 2.41998200  | 0.46909200  |
| H  | 4.61880100  | 1.65554500  | 0.56812500  |
| C  | 4.13889600  | 3.77560800  | 0.52241400  |
| H  | 5.15792200  | 4.10524100  | 0.69034600  |
| C  | 3.09357000  | 4.68517900  | 0.35035500  |
| H  | 3.28489700  | 5.75387700  | 0.38032900  |
| C  | 1.80691200  | 4.21686300  | 0.14131000  |
| H  | 0.97482000  | 4.90035600  | 0.00726000  |
| C  | 1.57381500  | 2.83727400  | 0.10931700  |
| C  | 0.32008700  | 2.16714200  | -0.03507600 |
| C  | 0.29030200  | 0.79216100  | 0.06007000  |
| C  | -1.07607600 | 0.30884700  | 0.03443700  |
| C  | -2.03503700 | 1.40977600  | -0.15007000 |
| C  | -3.05078900 | -1.28590100 | -1.78459300 |
| H  | -2.74191800 | -0.32345300 | -2.20429500 |
| H  | -4.04564000 | -1.53264500 | -2.16369700 |
| H  | -2.34470400 | -2.05413500 | -2.11179000 |
| C  | -3.03794300 | -1.21619300 | -0.24733500 |
| C  | -1.58651900 | -0.96395900 | 0.18604400  |
| C  | -0.97188500 | -2.14072000 | 0.69349900  |
| H  | 0.07169400  | -2.17447700 | 0.97232400  |
| C  | -1.80290700 | -3.20237000 | 0.86306700  |
| C  | -1.43759700 | -4.54205000 | 1.40191300  |
| H  | -1.58156100 | -5.32448200 | 0.64580800  |
| H  | -2.06172100 | -4.80934500 | 2.26360400  |
| H  | -0.39046700 | -4.55350500 | 1.71857800  |
| C  | -3.96058600 | -0.10668800 | 1.87203700  |
| H  | -2.94195900 | -0.02920100 | 2.26804700  |
| H  | -4.42643600 | -1.01307700 | 2.26465500  |
| H  | -4.53266900 | 0.76181900  | 2.20979100  |
| C  | -3.92289200 | -0.11099200 | 0.33258500  |
| C  | -3.38000100 | 1.24600700  | -0.10445300 |
| C  | -4.43799900 | 2.19222300  | -0.30422200 |
| H  | -4.26944800 | 3.26121100  | -0.40133500 |
| C  | -5.67089600 | 1.64204900  | -0.41152700 |
| C  | -6.96229900 | 2.34915700  | -0.63331800 |
| H  | -7.65087900 | 2.18659600  | 0.20518000  |
| H  | -7.46449300 | 1.98371300  | -1.53786900 |
| H  | -6.79588300 | 3.42481100  | -0.74230200 |
| C  | 6.11398100  | -1.79391000 | -0.21185300 |
| H  | 6.56392700  | -1.09048600 | -0.92095800 |
| H  | 6.46187100  | -2.80398900 | -0.43850400 |
| H  | 6.46036100  | -1.51134000 | 0.78844800  |
| C  | 4.61565700  | -1.66750800 | -0.27071800 |
| C  | 3.84017300  | -2.79224100 | -0.58994000 |
| H  | 4.36912400  | -3.71432100 | -0.80092300 |
| C  | 2.44663700  | -2.82675700 | -0.68549300 |
| C  | 1.76226200  | -4.09737100 | -1.10992100 |
| H  | 0.96660700  | -4.34099700 | -0.39862000 |
| H  | 2.45278400  | -4.93929200 | -1.19146000 |
| H  | 1.28014900  | -3.93487100 | -2.08056400 |
| N  | 2.61276000  | 1.96565800  | 0.27025500  |
| O  | 4.16953300  | -0.50298900 | -0.02391500 |
| O  | 1.63076500  | -1.86798100 | -0.45930200 |
| S  | -1.22673300 | 2.97090400  | -0.28383700 |
| S  | -3.46541000 | -2.89511900 | 0.39974700  |
| S  | -5.67224600 | -0.12039300 | -0.27829700 |
| Pt | 2.13557400  | 0.02903400  | 0.02046500  |



1-<sup>3</sup>Eso

|    |             |             |             |
|----|-------------|-------------|-------------|
| C  | -3.46062710 | 2.54891059  | -0.55208482 |
| H  | -4.29615210 | 1.85786759  | -0.62636582 |
| C  | -3.63680410 | 3.92595259  | -0.57665182 |
| H  | -4.63040210 | 4.34991959  | -0.67165882 |
| C  | -2.50220310 | 4.73189759  | -0.47369582 |
| H  | -2.59550610 | 5.81436459  | -0.48992882 |
| C  | -1.25079510 | 4.14912359  | -0.35450282 |
| H  | -0.35576110 | 4.75873359  | -0.27740082 |
| C  | -1.14235110 | 2.75121559  | -0.33868582 |
| C  | 0.07700590  | 1.98920559  | -0.24206982 |
| C  | 0.06134390  | 0.60669859  | -0.25642682 |
| C  | 1.37937090  | 0.06248959  | -0.12635882 |
| C  | 2.35910090  | 1.04292559  | -0.04678182 |
| C  | 3.05430590  | -1.47430941 | 2.09784618  |
| H  | 4.12473590  | -1.31596541 | 1.91653018  |
| H  | 2.95329390  | -2.13739041 | 2.96412818  |
| H  | 2.61868890  | -0.50509041 | 2.35784618  |
| C  | 2.36161590  | -2.03528541 | 0.90041118  |
| C  | 1.62884890  | -1.38871541 | -0.06705382 |
| C  | 1.08151590  | -2.29833741 | -1.03300682 |
| H  | 0.47591090  | -1.96967641 | -1.87237782 |
| C  | 1.40334390  | -3.60579741 | -0.81891682 |
| C  | 1.01972190  | -4.80034341 | -1.62858982 |
| H  | 0.44976690  | -5.52939641 | -1.04018582 |
| H  | 1.89524890  | -5.31990441 | -2.03698182 |
| H  | 0.39307990  | -4.48656541 | -2.46891982 |
| C  | 4.16850390  | -0.70957641 | -1.95092282 |
| H  | 4.07236790  | -1.75857141 | -1.64528382 |
| H  | 4.88671590  | -0.65992941 | -2.77624682 |
| H  | 3.19161190  | -0.38901641 | -2.32436482 |
| C  | 4.58816990  | 0.16116459  | -0.81507682 |
| C  | 3.81647090  | 0.93387059  | 0.02456318  |
| C  | 4.60703190  | 1.67523859  | 0.96606018  |
| H  | 4.17196090  | 2.33423359  | 1.71162818  |
| C  | 5.94831490  | 1.46024659  | 0.85947418  |
| C  | 7.05393190  | 2.05012659  | 1.67056318  |
| H  | 7.74263690  | 2.63868059  | 1.05275018  |
| H  | 7.64546790  | 1.28054459  | 2.18043618  |
| H  | 6.63748290  | 2.71381459  | 2.43452918  |
| C  | -5.75913910 | -2.06146341 | -0.48222782 |
| H  | -6.11411010 | -1.48375141 | -1.34140382 |
| H  | -6.56234610 | -2.16072241 | 0.25158218  |
| H  | -5.49481010 | -3.05905141 | -0.85205282 |
| C  | -4.52477810 | -1.40913141 | 0.09002518  |
| C  | -4.45085910 | -1.22050641 | 1.47827518  |
| H  | -5.31477410 | -1.52907741 | 2.05558018  |
| C  | -3.36093010 | -0.71794641 | 2.20729918  |
| C  | -3.47540510 | -0.64532241 | 3.71276518  |
| H  | -2.72742310 | -1.30768141 | 4.16218418  |
| H  | -4.46685310 | -0.92968641 | 4.07280518  |
| H  | -3.24523810 | 0.37229859  | 4.04413118  |
| N  | -2.25888910 | 1.99171359  | -0.43440182 |
| O  | -3.64544210 | -1.10006641 | -0.77208282 |
| O  | -2.24638910 | -0.31122141 | 1.75993918  |
| S  | 1.67427390  | 2.64108759  | -0.09528182 |
| S  | 2.38784790  | -3.74461641 | 0.60266618  |
| S  | 6.26550890  | 0.33486659  | -0.42177982 |
| Pt | -1.75600810 | -0.20989441 | -0.38084182 |

1-<sup>3</sup>ESc

|    |             |             |             |
|----|-------------|-------------|-------------|
| C  | 3.97560800  | 2.31522400  | 0.29219500  |
| H  | 4.70833800  | 1.51535900  | 0.28222800  |
| C  | 4.32618100  | 3.65225100  | 0.37792400  |
| H  | 5.37137100  | 3.93047300  | 0.45100500  |
| C  | 3.31014200  | 4.61328700  | 0.36308100  |
| C  | 3.55293200  | 5.67010600  | 0.42550500  |
| H  | 1.99049500  | 4.21106500  | 0.26922000  |
| H  | 1.18210800  | 4.93525900  | 0.25756500  |
| C  | 1.68769800  | 2.84385600  | 0.19212700  |
| C  | 0.40518600  | 2.23255100  | 0.11898000  |
| C  | 0.32749200  | 0.83367000  | 0.11258100  |
| C  | -1.02166400 | 0.40489200  | 0.13564800  |
| C  | -1.93918500 | 1.48626700  | 0.08789500  |
| C  | -3.00043900 | -0.98004100 | -1.87900700 |
| H  | -2.72429600 | 0.04110300  | -2.16187300 |
| H  | -3.99424100 | -1.19494200 | -2.28297700 |
| H  | -2.27871200 | -1.67130400 | -2.32223900 |
| C  | -2.97889300 | -1.12465500 | -0.35502300 |
| C  | -1.58096600 | -0.93370100 | 0.20593800  |
| C  | -1.09802400 | -2.02671300 | 0.90670400  |
| H  | -0.13181700 | -2.01974600 | 1.39818300  |
| C  | -1.93802000 | -3.12904800 | 0.95997100  |
| C  | -1.68997400 | -4.42877300 | 1.63941700  |
| H  | -1.67789500 | -5.26597900 | 0.92763400  |
| H  | -2.46601600 | -4.65350100 | 2.38320900  |
| H  | -0.72390600 | -4.40681900 | 2.15394700  |
| C  | -3.92165500 | -0.23891000 | 1.87610200  |
| H  | -2.90566900 | -0.20453900 | 2.28191400  |
| H  | -4.37917300 | -1.19545700 | 2.14424500  |
| H  | -4.50498000 | 0.57120500  | 2.32255100  |
| C  | -3.88073600 | -0.06127200 | 0.35251800  |
| C  | -3.33424400 | 1.31689500  | 0.02845300  |
| C  | -4.32776600 | 2.24002000  | -0.33515900 |
| H  | -4.12549600 | 3.29250900  | -0.51556200 |
| C  | -5.57802800 | 1.70294900  | -0.52751100 |
| C  | -6.80869800 | 2.42191300  | -0.95602100 |
| H  | -7.59676000 | 2.35407300  | -0.19524800 |
| H  | -7.21733000 | 1.99624100  | -1.88135500 |
| H  | -6.59122800 | 3.47959300  | -1.13116100 |
| C  | 5.96330900  | -2.07703800 | -0.40889700 |
| H  | 6.40692100  | -1.43821100 | -1.18043700 |
| H  | 6.22987400  | -3.11732100 | -0.60763800 |
| H  | 6.39566100  | -1.77265900 | 0.55074000  |
| C  | 4.47508900  | -1.85261400 | -0.37476800 |
| C  | 3.61071700  | -2.93764800 | -0.58586100 |
| H  | 4.06789900  | -3.90139900 | -0.77789500 |
| C  | 2.21279700  | -2.89181000 | -0.58838400 |
| C  | 1.42914000  | -4.14341800 | -0.87623200 |
| H  | 0.71094000  | -4.31641200 | -0.06821400 |
| H  | 2.06726300  | -5.02157700 | -0.99474000 |
| H  | 0.84421900  | -3.99658400 | -1.79093600 |
| N  | 2.69918300  | 1.91985600  | 0.20221600  |
| O  | 4.12376100  | -0.65097500 | -0.15359200 |
| O  | 1.47066000  | -1.87403700 | -0.37364300 |
| S  | -1.13648700 | 3.02906700  | 0.07015400  |
| S  | -3.43562100 | -2.85902800 | 0.08523400  |
| S  | -5.63227700 | -0.02602600 | -0.25049500 |
| Pt | 2.12445000  | 0.00195100  | -0.01968800 |

**1-<sup>3</sup>MC**

|    |             |             |             |
|----|-------------|-------------|-------------|
| C  | -3.65657600 | 2.36304200  | -0.60387800 |
| H  | -4.46230100 | 1.63502500  | -0.64215800 |
| C  | -3.89539900 | 3.73108100  | -0.61894800 |
| H  | -4.91060800 | 4.10874700  | -0.67165000 |
| C  | -2.79572800 | 4.58834100  | -0.56277100 |
| H  | -2.93912900 | 5.66509300  | -0.57485300 |
| C  | -1.51457000 | 4.06303800  | -0.48978900 |
| H  | -0.64645200 | 4.71353500  | -0.44386100 |
| C  | -1.34366800 | 2.67267500  | -0.47199000 |
| C  | -0.08977600 | 1.96264700  | -0.38584600 |
| C  | -0.05441300 | 0.58081700  | -0.35081200 |
| C  | 1.28128900  | 0.09084000  | -0.20453100 |
| C  | 2.22723100  | 1.10504200  | -0.16385400 |
| C  | 3.05065800  | -1.27231900 | 2.04344700  |
| H  | 4.10495700  | -1.07201700 | 1.81380600  |
| H  | 3.01033600  | -1.89463600 | 2.94375500  |
| H  | 2.57852400  | -0.31130500 | 2.26835400  |
| C  | 2.34690900  | -1.92017400 | 0.89803800  |
| C  | 1.57402000  | -1.34496600 | -0.08223900 |
| C  | 1.03911700  | -2.31397600 | -0.99615300 |
| H  | 0.41125500  | -2.04274700 | -1.83954400 |
| C  | 1.40924600  | -3.59887500 | -0.72942900 |
| C  | 1.04909500  | -4.84285600 | -1.47204600 |
| H  | 0.51101600  | -5.55611100 | -0.83639000 |
| H  | 1.93417300  | -5.35617600 | -1.86658900 |
| H  | 0.40074900  | -4.59052000 | -2.31667600 |
| C  | 4.06702800  | -0.73644900 | -1.93635800 |
| H  | 3.96530800  | -1.76539800 | -1.56995400 |
| H  | 4.79545300  | -0.73539700 | -2.75410800 |
| H  | 3.09430000  | -0.43819400 | -2.33803100 |
| C  | 4.46956200  | 0.19850500  | -0.84652000 |
| C  | 3.68356100  | 1.02433300  | -0.07345900 |
| C  | 4.45320500  | 1.80765800  | 0.85118700  |
| H  | 4.00360100  | 2.50849900  | 1.54823200  |
| C  | 5.79393000  | 1.56959100  | 0.80124000  |
| C  | 6.87849000  | 2.18290800  | 1.62348400  |
| H  | 7.61231700  | 2.71043500  | 1.00273900  |
| H  | 7.42155000  | 1.43159700  | 2.20881600  |
| H  | 6.44575000  | 2.90561500  | 2.32169300  |
| C  | -5.88961200 | -2.06978300 | -0.43206600 |
| H  | -6.21786000 | -1.54181100 | -1.33358300 |
| H  | -6.70481400 | -2.09070200 | 0.29472700  |
| H  | -5.65350900 | -3.09760800 | -0.73023600 |
| C  | -4.64078800 | -1.41552700 | 0.10437700  |
| C  | -4.60996400 | -1.02966700 | 1.45315600  |
| H  | -5.51273700 | -1.20503500 | 2.02700200  |
| C  | -3.51690200 | -0.50096900 | 2.16028000  |
| C  | -3.67968700 | -0.22775200 | 3.63692000  |
| H  | -2.96146100 | -0.83822400 | 4.19481800  |
| H  | -4.68831600 | -0.44171900 | 3.99794200  |
| H  | -3.43605000 | 0.82076200  | 3.83765400  |
| N  | -2.42648100 | 1.86223500  | -0.53497400 |
| O  | -3.70836500 | -1.28497600 | -0.74908900 |
| O  | -2.36325500 | -0.22154900 | 1.71255700  |
| S  | 1.48626100  | 2.67609500  | -0.26948600 |
| S  | 2.42763800  | -3.64018800 | 0.67677700  |
| S  | 6.13705400  | 0.37158000  | -0.40806000 |
| Pt | -1.83628900 | -0.32087400 | -0.42822000 |

**1-<sup>3</sup>MECP<sub>1</sub>**

|    |             |             |             |
|----|-------------|-------------|-------------|
| C  | -3.46062710 | 2.54891059  | -0.55208482 |
| H  | -4.29615210 | 1.85786759  | -0.62636582 |
| C  | -3.63680410 | 3.92595259  | -0.57665182 |
| H  | -4.63040210 | 4.34991959  | -0.67165882 |
| C  | -2.50220310 | 4.73189759  | -0.47369582 |
| H  | -2.59550610 | 5.81436459  | -0.48992882 |
| C  | -1.25079510 | 4.14912359  | -0.35450282 |
| H  | -0.35576110 | 4.75873359  | -0.27740082 |
| C  | -1.14235110 | 2.75121559  | -0.33868582 |
| C  | 0.07700590  | 1.98920559  | -0.24206982 |
| C  | 0.06134390  | 0.60669859  | -0.25642682 |
| C  | 1.37937090  | 0.06248959  | -0.12635882 |
| C  | 2.35910090  | 1.04292559  | -0.04678182 |
| C  | 3.05430590  | -1.47430941 | 2.09784618  |
| H  | 4.12473590  | -1.31596541 | 1.91653018  |
| H  | 2.95329390  | -2.13739041 | -2.96412818 |
| H  | 2.61868890  | -0.50509041 | 2.35784618  |
| C  | 2.36161590  | -2.03528541 | 0.90041118  |
| C  | 1.62884890  | -1.38871541 | -0.06705382 |
| C  | 1.08151590  | -2.29833741 | -1.03300682 |
| H  | 0.47591090  | -1.96967641 | -1.87237782 |
| C  | 1.40334390  | -3.60579741 | -0.81891682 |
| C  | 1.01972190  | -4.80034341 | -1.62858982 |
| H  | 0.44976690  | -5.52939641 | -1.04018582 |
| H  | 1.89524890  | -5.31990441 | -2.03698182 |
| H  | 0.39307990  | -4.48656541 | -2.46891982 |
| C  | 4.16850390  | -0.70957641 | -1.95092282 |
| H  | 4.07236790  | -1.75857141 | -1.64528382 |
| H  | 4.88671590  | -0.65992941 | -2.77624682 |
| H  | 3.19161190  | -0.38901641 | -2.32436482 |
| C  | 4.58816990  | 0.16116459  | -0.81507682 |
| C  | 3.81647090  | 0.93387059  | 0.02456318  |
| C  | 4.60703190  | 1.67523859  | 0.96606018  |
| H  | 4.17196090  | 2.33423359  | 1.71162818  |
| C  | 5.94831490  | 1.46024659  | 0.85947418  |
| C  | 7.05393190  | 2.05012659  | 1.67056318  |
| H  | 7.74263690  | 2.63868059  | 1.05275018  |
| H  | 7.64546790  | 1.28054459  | 2.18043618  |
| H  | 6.63748290  | 2.71381459  | 2.43452918  |
| C  | -5.75913910 | -2.06146341 | -0.48222782 |
| H  | -6.11411010 | -1.48375141 | -1.34140382 |
| H  | -6.56234610 | -2.16072241 | 0.25158218  |
| H  | -5.49481010 | -3.05905141 | -0.85205282 |
| C  | -4.52477810 | -1.40913141 | 0.09002518  |
| C  | -4.45085910 | -1.22050641 | 1.47827518  |
| H  | -5.31477410 | -1.52907741 | 2.05558018  |
| C  | -3.36093010 | -0.71794641 | 2.20729918  |
| C  | -3.47540510 | -0.64532241 | 3.71276518  |
| H  | -2.72742310 | -1.30768141 | 4.16218418  |
| H  | -4.46685310 | -0.92968641 | 4.07280518  |
| H  | -3.24523810 | 0.37229859  | 4.04413118  |
| N  | -2.25888910 | 1.99171359  | -0.43440182 |
| O  | -3.64544210 | -1.10006641 | -0.77208282 |
| O  | -2.24638910 | -0.31122141 | 1.75993918  |
| S  | 1.67427390  | 2.64108759  | -0.09528182 |
| S  | 2.38784790  | -3.74461641 | 0.60266618  |
| S  | 6.26550890  | 0.33486659  | -0.42177982 |
| Pt | -1.75600810 | -0.20989441 | -0.38084182 |

1-TS<sub>1</sub>

|    |             |             |             |
|----|-------------|-------------|-------------|
| C  | 3.45553700  | -3.11908300 | 0.09320100  |
| H  | 4.34558700  | -2.49790300 | 0.14817200  |
| C  | 3.51888800  | -4.50544900 | 0.03233100  |
| H  | 4.47820000  | -5.01124400 | 0.04366400  |
| C  | 2.31796400  | -5.21269900 | -0.03142300 |
| H  | 2.32292100  | -6.29793800 | -0.07949300 |
| C  | 1.11208600  | -4.52597400 | -0.04526100 |
| H  | 0.16829700  | -5.05793100 | -0.11785700 |
| C  | 1.11942800  | -3.12736500 | 0.01605100  |
| C  | -0.03915600 | -2.26242900 | -0.03585700 |
| C  | 0.09131900  | -0.89162400 | -0.15240500 |
| C  | -1.18058000 | -0.23707000 | -0.16137600 |
| C  | -2.24481900 | -1.12264200 | -0.08648500 |
| C  | -2.84157600 | 1.53989500  | 1.85524900  |
| H  | -3.90279700 | 1.45948900  | 1.58798400  |
| H  | -2.75470800 | 2.22847700  | 2.70237200  |
| H  | -2.51197700 | 0.54926400  | 2.18265800  |
| C  | -2.01202400 | 1.98629300  | 0.69832400  |
| C  | -1.29397700 | 1.22920300  | -0.19477200 |
| C  | -0.59461600 | 2.03306200  | -1.15556900 |
| H  | 0.02475600  | 1.60719000  | -1.93942700 |
| C  | -0.78176300 | 3.37453100  | -1.00590500 |
| C  | -0.20561000 | 4.48982300  | -1.81393100 |
| H  | 0.43198200  | 5.14479100  | -1.20749900 |
| H  | -0.98358800 | 5.11577200  | -2.26694500 |
| H  | 0.40914600  | 4.07826100  | -2.62026300 |
| C  | -3.72733600 | 0.73883100  | -2.14637700 |
| H  | -3.50700400 | 1.77679000  | -1.86763400 |
| H  | -4.40360500 | 0.75134900  | -3.00765800 |
| H  | -2.78267400 | 0.28025100  | -2.45276100 |
| C  | -4.30974200 | -0.02627900 | -1.00635800 |
| C  | -3.68188000 | -0.85955600 | -0.10662800 |
| C  | -4.59799200 | -1.44761400 | 0.82914100  |
| H  | -4.28293000 | -2.12455400 | 1.61762800  |
| C  | -5.89233000 | -1.05592000 | 0.66207800  |
| C  | -7.09275800 | -1.44884800 | 1.45779500  |
| H  | -7.85386300 | -1.93411400 | 0.83544200  |
| H  | -7.56398000 | -0.58436400 | 1.94015600  |
| H  | -6.79909700 | -2.15343800 | 2.24160200  |
| C  | 6.00524900  | 1.62814400  | -0.38893400 |
| H  | 6.57873600  | 0.77366400  | -0.01298600 |
| H  | 6.44688800  | 2.55077800  | -0.00575300 |
| H  | 6.08750200  | 1.61518000  | -1.48126500 |
| C  | 4.55827000  | 1.46128900  | 0.00320700  |
| C  | 3.94996300  | 2.46524900  | 0.77421700  |
| H  | 4.55643500  | 3.33242600  | 1.00959500  |
| C  | 2.63495300  | 2.47151200  | 1.26249500  |
| C  | 2.13350900  | 3.68720700  | 2.00257500  |
| H  | 1.21238800  | 4.03333300  | 1.52046300  |
| H  | 2.86401600  | 4.49928300  | 2.02789600  |
| H  | 1.87058100  | 3.40419100  | 3.02769900  |
| N  | 2.29747900  | -2.46393300 | 0.09704000  |
| O  | 4.01390200  | 0.39958100  | -0.43306900 |
| O  | 1.76689500  | 1.54832700  | 1.15732000  |
| S  | -1.69647300 | -2.77211700 | 0.02752900  |
| S  | -1.83219400 | 3.67682400  | 0.34498400  |
| S  | -6.00856800 | 0.04816700  | -0.67324100 |
| Pt | 1.96679200  | -0.18840600 | -0.17461200 |

1-TS<sub>2</sub>

|    |             |             |             |
|----|-------------|-------------|-------------|
| C  | 3.87773700  | 2.41632800  | 0.27859100  |
| H  | 4.63442500  | 1.63883100  | 0.27426900  |
| C  | 4.18893700  | 3.76434700  | 0.35529200  |
| H  | 5.22550700  | 4.07362100  | 0.42612900  |
| C  | 3.14420100  | 4.69580400  | 0.33431900  |
| H  | 3.35641000  | 5.75967400  | 0.38870700  |
| C  | 1.83763200  | 4.25478800  | 0.24463400  |
| H  | 1.00785900  | 4.95429200  | 0.22873900  |
| C  | 1.57364500  | 2.87692900  | 0.17709000  |
| C  | 0.31140500  | 2.23311600  | 0.11127100  |
| C  | 0.27623800  | 0.82986300  | 0.10555700  |
| C  | -1.04855200 | 0.35370300  | 0.10078100  |
| C  | -2.02623200 | 1.41141500  | 0.11081500  |
| C  | -3.09186600 | -0.90379800 | -1.99292800 |
| H  | -4.17693100 | -1.00129500 | -2.10667000 |
| H  | -2.61007200 | -1.44961800 | -2.81310000 |
| H  | -2.82816500 | 0.15107800  | -2.08977200 |
| C  | -2.62225100 | -1.44126000 | -0.67607900 |
| C  | -1.49609700 | -1.02498400 | 0.06438700  |
| C  | -1.01546400 | -2.04308300 | 0.93824100  |
| H  | -0.18645500 | -1.87950800 | 1.61745300  |
| C  | -1.72236300 | -3.20831400 | 0.89075500  |
| C  | -1.54378500 | -4.43232800 | 1.72291100  |
| H  | -1.37510300 | -5.32479200 | 1.10729900  |
| H  | -2.42340200 | -4.63059600 | 2.34805500  |
| H  | -0.68041400 | -4.30777300 | 2.38374600  |
| C  | -3.76138000 | -0.52040900 | 2.00809400  |
| H  | -3.97965400 | -1.59401400 | 2.06060400  |
| H  | -4.37074800 | -0.01543600 | 2.77041700  |
| H  | -2.71034100 | -0.37110500 | 2.26313500  |
| C  | -4.05345900 | 0.03513900  | 0.64887500  |
| C  | -3.41262200 | 1.26107100  | 0.15643700  |
| C  | -4.37047200 | 2.17318000  | -0.38464100 |
| H  | -4.10213300 | 3.14589300  | -0.78707900 |
| C  | -5.63055700 | 1.66851500  | -0.49522900 |
| C  | -6.81871200 | 2.30883400  | -1.12147100 |
| H  | -7.64451500 | 2.40520000  | -0.40557400 |
| H  | -7.19075400 | 1.71407300  | -1.96520200 |
| H  | -6.56477800 | 3.30734800  | -1.48883300 |
| C  | 5.98775100  | -1.94035300 | -0.34719300 |
| H  | 6.42318800  | -1.30824100 | -1.12890200 |
| H  | 6.28085700  | -2.97806400 | -0.52072600 |
| H  | 6.40421500  | -1.60475600 | 0.60904900  |
| C  | 4.49418400  | -1.75071600 | -0.33080200 |
| C  | 3.65822600  | -2.85913800 | -0.53319700 |
| H  | 4.14045600  | -3.81455400 | -0.70484000 |
| C  | 2.25907900  | -2.84709700 | -0.55507000 |
| C  | 1.51019700  | -4.12196200 | -0.83241800 |
| H  | 0.79427300  | -4.30151500 | -0.02399800 |
| H  | 2.17172200  | -4.98423200 | -0.93895100 |
| H  | 0.92350600  | -4.00040500 | -1.74963500 |
| N  | 2.61487700  | 1.98192100  | 0.19227800  |
| O  | 4.11296100  | -0.55409900 | -0.13246600 |
| O  | 1.49050600  | -1.84478000 | -0.36634400 |
| S  | -1.25694600 | 2.99373100  | 0.05811400  |
| S  | -3.00225400 | -3.10198400 | -0.29368900 |
| S  | -5.74804800 | 0.03235000  | 0.14960400  |
| Pt | 2.09529000  | 0.04885100  | -0.02062000 |

**1-<sup>3</sup>MECP<sub>2</sub>**

|    |             |             |             |
|----|-------------|-------------|-------------|
| C  | 3.95632400  | 2.33222700  | 0.33146200  |
| H  | 4.69674200  | 1.53968900  | 0.33660500  |
| C  | 4.29042200  | 3.67371700  | 0.42016100  |
| H  | 5.33090800  | 3.96363200  | 0.51301200  |
| C  | 3.26546100  | 4.62256000  | 0.38231100  |
| H  | 3.49488000  | 5.68228500  | 0.44569600  |
| C  | 1.95173200  | 4.20442000  | 0.26442400  |
| H  | 1.13631700  | 4.92009000  | 0.23503800  |
| C  | 1.66736700  | 2.83428100  | 0.18661300  |
| C  | 0.39106200  | 2.20680700  | 0.09667700  |
| C  | 0.32090200  | 0.81102700  | 0.09970600  |
| C  | -1.03629400 | 0.37894400  | 0.11543900  |
| C  | -1.95230700 | 1.46369400  | 0.05501200  |
| C  | -3.05948900 | -1.02794100 | -1.86382100 |
| H  | -2.77775500 | -0.01688000 | -2.17606800 |
| H  | -4.06207400 | -1.24194200 | -2.24652400 |
| H  | -2.35391900 | -1.73750300 | -2.30440000 |
| C  | -3.01647500 | -1.14109500 | -0.33731300 |
| C  | -1.60442000 | -0.95455700 | 0.19648200  |
| C  | -1.10939100 | -2.06020300 | 0.87861100  |
| H  | -0.12785800 | -2.06564600 | 1.33888300  |
| C  | -1.95842100 | -3.15056400 | 0.96019000  |
| C  | -1.71272100 | -4.44947000 | 1.64327500  |
| H  | -1.74965000 | -5.29430000 | 0.94177700  |
| H  | -2.46348800 | -4.64779500 | 2.41989200  |
| H  | -0.72699600 | -4.44635300 | 2.11925900  |
| C  | -3.93793000 | -0.21837200 | 1.88598000  |
| H  | -2.91941300 | -0.19450100 | 2.28688200  |
| H  | -4.40818900 | -1.16462700 | 2.16851600  |
| H  | -4.50684100 | 0.60488200  | 2.32722000  |
| C  | -3.90580000 | -0.06083500 | 0.36028900  |
| C  | -3.35145200 | 1.30533700  | 0.00721000  |
| C  | -4.33920200 | 2.23272400  | -0.36443800 |
| H  | -4.12870200 | 3.28031600  | -0.56384800 |
| C  | -5.59679000 | 1.70526900  | -0.53706000 |
| C  | -6.82540600 | 2.42599200  | -0.96891400 |
| H  | -7.60941600 | 2.37799900  | -0.20236800 |
| H  | -7.24437400 | 1.98922600  | -1.88445400 |
| H  | -6.60124100 | 3.47892500  | -1.16326900 |
| C  | 6.02659600  | -1.98783000 | -0.38115000 |
| H  | 6.47218600  | -1.32134000 | -1.12776900 |
| H  | 6.31328800  | -3.01770100 | -0.60412200 |
| H  | 6.44044600  | -1.70461000 | 0.59314400  |
| C  | 4.53354400  | -1.79316000 | -0.36441600 |
| C  | 3.69629100  | -2.89171600 | -0.60672000 |
| H  | 4.17776800  | -3.84045700 | -0.81357100 |
| C  | 2.29755000  | -2.88031200 | -0.62286100 |
| C  | 1.55842900  | -4.14774900 | -0.95870100 |
| H  | 0.78848500  | -4.33653400 | -0.20409400 |
| H  | 2.22315700  | -5.01112700 | -1.03021600 |
| H  | 1.04012900  | -4.01798600 | -1.91571400 |
| N  | 2.68646700  | 1.92380800  | 0.21838700  |
| O  | 4.15114700  | -0.60398500 | -0.12766100 |
| O  | 1.52633300  | -1.88807600 | -0.39002400 |
| S  | -1.14933400 | 3.00699200  | 0.02945200  |
| S  | -3.48328400 | -2.86316100 | 0.13785600  |
| S  | -5.66049000 | -0.01997600 | -0.23021100 |
| Pt | 2.13759900  | 0.00142600  | -0.01462800 |

## 2-1GSo

|    |             |             |             |
|----|-------------|-------------|-------------|
| C  | -3.71957300 | -1.07536800 | 0.15201900  |
| H  | -4.25005000 | -0.12941900 | 0.14308200  |
| C  | -4.36878000 | -2.29553000 | 0.22729400  |
| C  | -3.60874200 | -3.47063900 | 0.21928500  |
| H  | -4.09879500 | -4.43765800 | 0.27952000  |
| C  | -2.23339900 | -3.38522500 | 0.14319200  |
| H  | -1.61789600 | -4.27859400 | 0.13928900  |
| C  | -1.62009500 | -2.12656800 | 0.07659300  |
| C  | -0.22622300 | -1.82880500 | 0.02656800  |
| C  | 0.15963900  | -0.49319800 | 0.01459200  |
| C  | 1.58458800  | -0.36569100 | 0.05443700  |
| C  | 2.22729100  | -1.59865400 | 0.05793800  |
| C  | 3.84444800  | 0.63523200  | -1.91533400 |
| H  | 4.79088800  | 0.12169100  | -1.70451500 |
| H  | 4.01610400  | 1.34071900  | -2.73563800 |
| H  | 3.13032000  | -0.11995600 | -2.25629900 |
| C  | 3.30718800  | 1.32089800  | -0.70404800 |
| C  | 2.30631900  | 0.91587600  | 0.14246500  |
| C  | 2.07138600  | 1.85144400  | 1.20356700  |
| H  | 1.30322300  | 1.70187000  | 1.95563700  |
| C  | 2.89275300  | 2.93748300  | 1.18211500  |
| C  | 2.93791600  | 4.08884600  | 2.13235400  |
| H  | 2.76346100  | 5.04788400  | 1.62905200  |
| H  | 3.90533000  | 4.16059300  | 2.64383100  |
| H  | 2.16237000  | 3.96452300  | 2.89434600  |
| C  | 4.34611600  | -0.50736100 | 2.12876700  |
| H  | 4.56734600  | 0.53788900  | 1.88156900  |
| H  | 4.96826600  | -0.79634900 | 2.98241800  |
| H  | 3.29710200  | -0.55355300 | 2.43411600  |
| C  | 4.57115000  | -1.40704400 | 0.96101900  |
| C  | 3.65795800  | -1.90763200 | 0.06068300  |
| C  | 4.26002200  | -2.77865600 | -0.90868400 |
| H  | 3.69524000  | -3.25833900 | -1.70236600 |
| C  | 5.60767900  | -2.92196300 | -0.76547900 |
| C  | 6.55086200  | -3.72541400 | -1.59816000 |
| H  | 7.06501300  | -4.49251100 | -1.00720700 |
| H  | 7.31970500  | -3.09804900 | -2.06422400 |
| H  | 5.99776100  | -4.22936100 | -2.39639900 |
| C  | -4.59512900 | 3.69003600  | -0.42854800 |
| H  | -5.17552400 | 3.21557100  | -1.22750700 |
| H  | -4.59873100 | 4.77200400  | -0.57687500 |
| H  | -5.09577700 | 3.45482300  | 0.51713100  |
| C  | -3.20708100 | 3.10932800  | -0.41216800 |
| C  | -2.10350100 | 3.95515700  | -0.59236500 |
| H  | -2.31095800 | 5.00774100  | -0.74628300 |
| C  | -0.75773300 | 3.56962400  | -0.62184100 |
| C  | 0.30461500  | 4.59679300  | -0.89550100 |
| H  | 1.09105400  | 4.50421000  | -0.14036500 |
| H  | -0.08792200 | 5.61577200  | -0.90863500 |
| H  | 0.77075300  | 4.37910900  | -1.86327200 |
| N  | -2.38783100 | -0.99313500 | 0.08032200  |
| O  | -3.16044500 | 1.84911200  | -0.23602900 |
| O  | -0.28420600 | 2.39556700  | -0.44974400 |
| S  | 1.10825700  | -2.92815700 | 0.03873300  |
| S  | 3.96850900  | 2.83946000  | -0.18136100 |
| S  | 6.16025300  | -1.98715900 | 0.58945600  |
| C  | -5.86193900 | -2.36061800 | 0.27195200  |
| Pt | -1.37821900 | 0.74109200  | -0.11961200 |
| F  | -6.28258400 | -3.25140000 | 1.18612200  |
| F  | -6.40756800 | -1.17345200 | 0.57364600  |
| F  | -6.37584000 | -2.74866600 | -0.90890900 |

## 2-1GSc

|    |             |             |             |
|----|-------------|-------------|-------------|
| C  | -3.76358800 | -1.03998100 | 0.24944400  |
| H  | -4.29243800 | -0.10115100 | 0.36869000  |
| C  | -4.40905600 | -2.26529700 | 0.24775100  |
| C  | -3.65480200 | -3.42997500 | 0.05725600  |
| H  | -4.14270600 | -4.39998900 | 0.05218700  |
| C  | -2.28971100 | -3.33139900 | -0.11447200 |
| H  | -1.67932300 | -4.21638500 | -0.25889200 |
| C  | -1.67808600 | -2.06807000 | -0.09179400 |
| C  | -0.29041600 | -1.77181000 | -0.18998200 |
| C  | 0.11372500  | -0.45786100 | -0.03620600 |
| C  | 1.55611800  | -0.37036900 | -0.00392300 |
| C  | 2.18613000  | -1.68373700 | -0.21121100 |
| C  | 3.95347300  | 0.69376800  | -1.69590400 |
| H  | 3.41620700  | -0.13548000 | -2.16615000 |
| H  | 4.99203100  | 0.67785300  | -2.03536500 |
| H  | 3.49124100  | 1.63424600  | -2.00820700 |
| C  | 3.86450300  | 0.57519400  | -0.16389800 |
| C  | 2.38551100  | 0.71134200  | 0.22009800  |
| C  | 2.09301100  | 1.98467200  | 0.77451700  |
| H  | 1.08932900  | 2.28608500  | 1.03846400  |
| C  | 3.17444300  | 2.77433400  | 1.01387400  |
| C  | 3.16344300  | 4.13751800  | 1.61378500  |
| H  | 3.54371800  | 4.88304700  | 0.90388800  |
| H  | 3.80258500  | 4.18601700  | 2.50394700  |
| H  | 2.14693100  | 4.41970400  | 1.90289200  |
| C  | 4.36861700  | -0.81764600 | 1.92853800  |
| H  | 3.35351400  | -0.62431800 | 2.29281200  |
| H  | 5.05044500  | -0.09041000 | 2.37458700  |
| H  | 4.66570700  | -1.82164000 | 2.24357400  |
| C  | 4.39453600  | -0.74924900 | 0.39009300  |
| C  | 3.52243700  | -1.89213200 | -0.12233900 |
| C  | 4.29366700  | -3.08136400 | -0.33623800 |
| H  | 3.84761900  | -4.06054500 | -0.48713800 |
| C  | 5.63232300  | -2.88160300 | -0.38430500 |
| C  | 6.69312900  | -3.90336000 | -0.60204500 |
| H  | 7.36479300  | -3.96563700 | 0.26313200  |
| H  | 7.31199300  | -3.65371000 | -1.47298400 |
| H  | 6.24721000  | -4.88844400 | -0.76696300 |
| C  | -4.75209700 | 3.64121200  | -0.29514400 |
| H  | -5.35719400 | 3.12375300  | -1.04763100 |
| H  | -4.80255000 | 4.71762600  | -0.47183700 |
| H  | -5.19142500 | 3.41599300  | 0.68281900  |
| C  | -3.34594700 | 3.10962700  | -0.33944600 |
| C  | -2.28159400 | 3.98528500  | -0.60087500 |
| H  | -2.52911100 | 5.02529500  | -0.77851700 |
| C  | -0.93170900 | 3.63461600  | -0.68455500 |
| C  | 0.08549000  | 4.67792700  | -1.05727700 |
| H  | 0.94071700  | 4.61606200  | -0.37708500 |
| H  | -0.32685300 | 5.68899500  | -1.04383100 |
| H  | 0.46318800  | 4.46275300  | -2.06365800 |
| N  | -2.44199600 | -0.94618400 | 0.08758700  |
| O  | -3.24406100 | 1.85801400  | -0.13619300 |
| O  | -0.41770100 | 2.47854200  | -0.49186500 |
| S  | 0.98785000  | -2.95840600 | -0.43575000 |
| S  | 4.70487900  | 2.05158900  | 0.56725200  |
| S  | 6.10345900  | -1.19196200 | -0.16955800 |
| Pt | -1.44195500 | 0.78753900  | -0.08250100 |
| C  | -5.89372300 | -2.34170600 | 0.39897900  |
| F  | -6.41202800 | -1.19190800 | 0.85606300  |
| F  | -6.49880300 | -2.61475200 | -0.77138700 |
| F  | -6.24728000 | -3.31957300 | 1.25068300  |

2-<sup>3</sup>ESo

|    |             |             |             |
|----|-------------|-------------|-------------|
| C  | -3.69670600 | -1.10624800 | 0.15492600  |
| H  | -4.24436800 | -0.16891500 | 0.16041300  |
| C  | -4.32705400 | -2.33884200 | 0.24049200  |
| C  | -3.55445500 | -3.52527900 | 0.21361100  |
| H  | -4.04311200 | -4.49161600 | 0.28474200  |
| C  | -2.19368900 | -3.43069400 | 0.09890300  |
| H  | -1.56725300 | -4.31624200 | 0.07781200  |
| C  | -1.58426500 | -2.15087000 | 0.01935900  |
| C  | -0.22555400 | -1.85654100 | -0.08309200 |
| C  | 0.18440600  | -0.44020600 | -0.05488700 |
| C  | 1.55849400  | -0.32111000 | 0.03658100  |
| C  | 2.24832200  | -1.56870100 | 0.00603000  |
| C  | 3.84740400  | 0.67707300  | -1.89346000 |
| H  | 4.80643900  | 0.19434800  | -1.66961900 |
| H  | 4.00443300  | 1.38079800  | -2.71618200 |
| H  | 3.15375600  | -0.09715600 | -2.23199300 |
| C  | 3.28583000  | 1.36863100  | -0.68904400 |
| C  | 2.27985900  | 0.96567800  | 0.14576600  |
| C  | 2.02319000  | 1.90809000  | 1.20083500  |
| H  | 1.24862600  | 1.75631000  | 1.94627300  |
| C  | 2.83706000  | 2.99529800  | 1.17801000  |
| C  | 2.86739200  | 4.15935500  | 2.12073200  |
| H  | 2.69883600  | 5.10935100  | 1.60218300  |
| H  | 3.82807200  | 4.23371900  | 2.64063700  |
| H  | 2.08217100  | 4.03914700  | 2.87144200  |
| C  | 4.39010200  | -0.30643900 | 2.00832100  |
| H  | 4.62472700  | 0.71406700  | 1.68387000  |
| H  | 5.02635400  | -0.54785700 | 2.86503800  |
| H  | 3.34789700  | -0.31740800 | 2.33605700  |
| C  | 4.58583800  | -1.30327600 | 0.90995600  |
| C  | 3.64672200  | -1.89365700 | 0.07714000  |
| C  | 4.23336500  | -2.92274800 | -0.75412600 |
| H  | 3.66330400  | -3.49340800 | -1.48095000 |
| C  | 5.57103600  | -3.07031400 | -0.59086300 |
| C  | 6.50203000  | -3.99912000 | -1.30572300 |
| H  | 6.97966600  | -4.69850200 | -0.61228700 |
| H  | 7.29376600  | -3.45246400 | -1.82706100 |
| H  | 5.94373600  | -4.57899900 | -2.04463900 |
| C  | -4.62253100 | 3.72444700  | -0.34340400 |
| H  | -5.22194700 | 3.25988400  | -1.13195200 |
| H  | -4.61864000 | 4.80630400  | -0.48120500 |
| H  | -5.09705200 | 3.48279700  | 0.61253200  |
| C  | -3.23384100 | 3.13090700  | -0.36751200 |
| C  | -2.13459200 | 3.98831300  | -0.54251700 |
| H  | -2.35135300 | 5.04250800  | -0.65642100 |
| C  | -0.78482000 | 3.61608900  | -0.61779300 |
| C  | 0.25615700  | 4.67837600  | -0.87236800 |
| H  | 1.04564300  | 4.57868700  | -0.12149600 |
| H  | -0.15975200 | 5.68655700  | -0.85145500 |
| H  | 0.71743300  | 4.49650800  | -1.84838000 |
| N  | -2.37439200 | -1.00362400 | 0.05153400  |
| O  | -3.18969500 | 1.87116100  | -0.22732400 |
| O  | -0.29228200 | 2.44844700  | -0.50509500 |
| S  | 1.10593200  | -2.94889400 | -0.20807600 |
| S  | 3.92805500  | 2.90005500  | -0.17488800 |
| S  | 6.15657700  | -1.96904100 | 0.62509500  |
| C  | -5.81055000 | -2.43332000 | 0.36783300  |
| Pt | -1.36435000 | 0.74062700  | -0.16514700 |
| F  | -6.16968300 | -3.03201600 | 1.51686000  |
| F  | -6.39927700 | -1.23095500 | 0.33971900  |
| F  | -6.34320200 | -3.17059800 | -0.62142400 |

2-<sup>3</sup>ESc

|    |             |             |             |
|----|-------------|-------------|-------------|
| C  | -3.81980500 | -0.95758400 | 0.16884100  |
| H  | -4.31775700 | 0.00564900  | 0.17872100  |
| C  | -4.51319600 | -2.15440300 | 0.21920700  |
| C  | -3.79358900 | -3.35876300 | 0.18328800  |
| H  | -4.31905900 | -4.30804800 | 0.22367100  |
| C  | -2.41930700 | -3.32215200 | 0.10588100  |
| H  | -1.83724900 | -4.23750500 | 0.08127200  |
| C  | -1.75616200 | -2.08226800 | 0.06565100  |
| C  | -0.36242000 | -1.83695200 | 0.01783900  |
| C  | 0.08646800  | -0.50579100 | 0.05000100  |
| C  | 1.49674500  | -0.45355800 | 0.10907100  |
| C  | 2.09543100  | -1.74156600 | 0.04390200  |
| C  | 3.82438200  | 0.41259700  | -1.82454500 |
| H  | 3.29216300  | -0.48712000 | -2.15108300 |
| H  | 4.85005200  | 0.36452500  | -2.20222500 |
| H  | 3.32702900  | 1.28576200  | -2.25501200 |
| C  | 3.80122300  | 0.51267300  | -0.29656900 |
| C  | 2.38801600  | 0.68476200  | 0.23107900  |
| C  | 2.19079000  | 1.85068000  | 0.95369400  |
| H  | 1.24314000  | 2.08997900  | 1.42298200  |
| C  | 3.29151500  | 2.68677900  | 1.06044400  |
| C  | 3.37820200  | 3.98814700  | 1.77549900  |
| H  | 3.61194900  | 4.81504000  | 1.09066900  |
| H  | 4.16304700  | 3.97777500  | 2.54342100  |
| H  | 2.42613700  | 4.21272900  | 2.26685300  |
| C  | 4.41565400  | -0.65383200 | 1.91962900  |
| H  | 3.41652000  | -0.42933300 | 2.30623200  |
| H  | 5.10200800  | 0.14033300  | 2.22639800  |
| H  | 4.75260100  | -1.60108100 | 2.34982100  |
| C  | 4.36857900  | -0.77131300 | 0.38988300  |
| C  | 3.48405000  | -1.94567800 | 0.01379900  |
| C  | 4.20684500  | -3.09161700 | -0.35785300 |
| H  | 3.73887800  | -4.04835900 | -0.57349400 |
| C  | 5.55829400  | -2.89861000 | -0.51228400 |
| C  | 6.56428800  | -3.90735200 | -0.94284500 |
| H  | 7.32528100  | -4.06671600 | -0.16857900 |
| H  | 7.09007400  | -3.58187000 | -1.84923700 |
| H  | 6.07968100  | -4.86550800 | -1.15110900 |
| C  | -4.56506700 | 3.79683100  | -0.46494400 |
| H  | -5.14485800 | 3.32065600  | -1.26327800 |
| H  | -4.54474000 | 4.87599300  | -0.63106600 |
| H  | -5.08197600 | 3.58721300  | 0.47796700  |
| C  | -3.18959000 | 3.18852600  | -0.42178200 |
| C  | -2.06619300 | 4.01005600  | -0.60223700 |
| H  | -2.25035200 | 5.06402200  | -0.77487800 |
| C  | -0.73027600 | 3.59656700  | -0.60034300 |
| C  | 0.36012300  | 4.60144700  | -0.85349800 |
| H  | 1.08247400  | 4.56691200  | -0.03127700 |
| H  | -0.02192200 | 5.61832400  | -0.96400000 |
| H  | 0.90359600  | 4.31874500  | -1.76180500 |
| N  | -2.48704500 | -0.91938000 | 0.09546100  |
| O  | -3.16970900 | 1.93223700  | -0.22383200 |
| O  | -0.28498900 | 2.41376000  | -0.40715200 |
| S  | 0.91318800  | -3.01501900 | -0.03130400 |
| S  | 4.68977000  | 2.04919000  | 0.21232600  |
| S  | 6.06182500  | -1.25575300 | -0.18213800 |
| Pt | -1.41863400 | 0.77748100  | -0.08516600 |
| C  | -6.00538100 | -2.16820500 | 0.26477400  |
| F  | -6.51176900 | -0.96320900 | 0.56733800  |
| F  | -6.53675500 | -2.53898100 | -0.91533100 |
| F  | -6.45821400 | -3.04505500 | 1.17865500  |

**2-<sup>3</sup>MC**

|    |             |             |             |
|----|-------------|-------------|-------------|
| C  | 3.56032100  | -1.08071700 | -0.39812900 |
| H  | 4.15234100  | -0.17179700 | -0.44545300 |
| C  | 4.14394700  | -2.33960500 | -0.33992900 |
| C  | 3.30592600  | -3.45767500 | -0.28978900 |
| H  | 3.73373200  | -4.45502200 | -0.25667900 |
| C  | 1.93476600  | -3.28463800 | -0.29129700 |
| H  | 1.26844400  | -4.14056400 | -0.25603000 |
| C  | 1.40408500  | -1.98530700 | -0.33719300 |
| C  | 0.01241100  | -1.62413000 | -0.31879500 |
| C  | -0.38048700 | -0.29468200 | -0.34041200 |
| C  | -1.79818500 | -0.16477500 | -0.22618300 |
| C  | -2.44967200 | -1.38924200 | -0.15789500 |
| C  | -3.86381100 | 0.74397700  | 1.99279100  |
| H  | -4.83277100 | 0.27570700  | 1.77892200  |
| H  | -3.98062400 | 1.37761300  | 2.87836800  |
| H  | -3.16003800 | -0.05778700 | 2.23551600  |
| C  | -3.35471300 | 1.52345100  | 0.82653200  |
| C  | -2.45591700 | 1.14762600  | -0.14336800 |
| C  | -2.18974300 | 2.20059500  | -1.08117300 |
| H  | -1.51063100 | 2.08358400  | -1.92050200 |
| C  | -2.88405800 | 3.34980700  | -0.84331800 |
| C  | -2.86050800 | 4.62621500  | -1.61715200 |
| H  | -2.53123300 | 5.47093500  | -1.00055800 |
| H  | -3.84794500 | 4.87879500  | -2.02158700 |
| H  | -2.16553800 | 4.53216900  | -2.45705500 |
| C  | -4.67968000 | -0.12813400 | -1.99206800 |
| H  | -4.83568300 | 0.90183100  | -1.64822100 |
| H  | -5.38436500 | -0.32743700 | -2.80615600 |
| H  | -3.66327600 | -0.18513000 | -2.39239500 |
| C  | -4.84046200 | -1.10873300 | -0.87975800 |
| C  | -3.87806100 | -1.68417700 | -0.07918400 |
| C  | -4.43066800 | -2.61601500 | 0.86279500  |
| H  | -3.82441000 | -3.15767000 | 1.58260400  |
| C  | -5.78670700 | -2.73304600 | 0.79856600  |
| C  | -6.68769100 | -3.58292400 | 1.63181100  |
| H  | -7.25061300 | -4.29972200 | 1.02244800  |
| H  | -7.41522900 | -2.98137800 | 2.18920000  |
| H  | -6.09353000 | -4.14907100 | 2.35536000  |
| C  | 4.71813700  | 3.57619600  | -0.34232300 |
| H  | 5.19820100  | 3.08214300  | -1.19364300 |
| H  | 5.46874400  | 3.79874300  | 0.41928800  |
| H  | 4.29791000  | 4.51800900  | -0.71305500 |
| C  | 3.59769500  | 2.70869400  | 0.17325800  |
| C  | 3.56917200  | 2.38795800  | 1.53951900  |
| H  | 4.38440500  | 2.77241400  | 2.14150700  |
| C  | 2.57094600  | 1.67926400  | 2.22847800  |
| C  | 2.70340500  | 1.52166400  | 3.72453100  |
| H  | 1.85474500  | 2.01378400  | 4.21194700  |
| H  | 3.63293400  | 1.94403600  | 4.11273700  |
| H  | 2.65089000  | 0.45850400  | 3.98106800  |
| N  | 2.24414100  | -0.92269200 | -0.39835900 |
| O  | 2.76074400  | 2.34980400  | -0.71356500 |
| O  | 1.52466200  | 1.14246700  | 1.74952000  |
| S  | -1.32809100 | -2.71801900 | -0.19531100 |
| S  | -3.88156700 | 3.15648700  | 0.56499800  |
| S  | -6.41108000 | -1.69639700 | -0.44702800 |
| Pt | 1.11354600  | 1.02693600  | -0.41341400 |
| C  | 5.62997100  | -2.48935900 | -0.27632200 |
| F  | 6.25986800  | -1.42653300 | -0.80040100 |
| F  | 6.04097300  | -3.58169200 | -0.94107500 |
| F  | 6.06294000  | -2.61953600 | 0.99070400  |

**2-<sup>3</sup>MECP<sub>1</sub>**

|    |             |             |             |
|----|-------------|-------------|-------------|
| C  | 3.44111001  | -1.18455156 | -0.38099486 |
| H  | 4.04984201  | -0.29156256 | -0.48554886 |
| C  | 4.00478601  | -2.45240056 | -0.31653186 |
| C  | 3.14730901  | -3.55014056 | -0.19323086 |
| H  | 3.55738901  | -4.55478356 | -0.15295886 |
| C  | 1.78203401  | -3.34846956 | -0.13675686 |
| H  | 1.10022301  | -4.18801756 | -0.04397186 |
| C  | 1.27271501  | -2.04089856 | -0.20155286 |
| C  | -0.11085699 | -1.65847556 | -0.16116186 |
| C  | -0.48503399 | -0.32683756 | -0.23284186 |
| C  | -1.90315999 | -0.17326656 | -0.14531086 |
| C  | -2.57041599 | -1.38660056 | -0.03462086 |
| C  | -3.93559899 | 0.91845744  | 2.02796214  |
| H  | -4.91528599 | 0.45315844  | 1.86181214  |
| H  | -4.03102699 | 1.61524144  | 2.86759914  |
| H  | -3.24007899 | 0.12604544  | 2.32074614  |
| C  | -3.42928699 | 1.60712144  | 0.80469514  |
| C  | -2.54625999 | 1.15151244  | -0.14545086 |
| C  | -2.26369099 | 2.14010044  | -1.14617586 |
| H  | -1.58903099 | 1.95832244  | -1.97737286 |
| C  | -2.92810299 | 3.31839944  | -0.97302986 |
| C  | -2.87885899 | 4.54833844  | -1.81829786 |
| H  | -2.52319099 | 5.41817344  | -1.25341886 |
| H  | -3.86304099 | 4.80429444  | -2.22839286 |
| H  | -2.19429999 | 4.39267744  | -2.65778186 |
| C  | -4.75783399 | -0.28860656 | -2.03038786 |
| H  | -4.94905799 | 0.75985844  | -1.77125286 |
| H  | -5.42658599 | -0.56269156 | -2.85321286 |
| H  | -3.72701999 | -0.35088756 | -2.39111086 |
| C  | -4.94165899 | -1.19171756 | -0.85713386 |
| C  | -4.00190499 | -1.68431556 | 0.02188814  |
| C  | -4.57288399 | -2.57645856 | 0.99086814  |
| H  | -3.98474699 | -3.05566456 | 1.76805814  |
| C  | -5.91919399 | -2.74609456 | 0.86744914  |
| C  | -6.83458499 | -3.58435856 | 1.69759414  |
| H  | -7.30201599 | -4.38341456 | 1.10938614  |
| H  | -7.63972699 | -2.99088456 | 2.14627014  |
| H  | -6.27097499 | -4.05362356 | 2.50936314  |
| C  | 4.41978101  | 3.78490644  | -0.32980286 |
| H  | 4.90178801  | 3.34384644  | -1.20792286 |
| H  | 5.17674401  | 4.04489044  | 0.41386514  |
| H  | 3.92410001  | 4.70488744  | -0.66228486 |
| C  | 3.37814901  | 2.83463544  | 0.20611414  |
| C  | 3.33719001  | 2.59349744  | 1.58834414  |
| H  | 4.09720001  | 3.08259644  | 2.18715014  |
| C  | 2.38740901  | 1.83307244  | 2.28920514  |
| C  | 2.49560701  | 1.75951444  | 3.79448214  |
| H  | 1.61247301  | 2.22921744  | 4.24127014  |
| H  | 3.39326701  | 2.25206944  | 4.17541114  |
| H  | 2.49419801  | 0.71032944  | 4.10627614  |
| N  | 2.12962001  | -0.99689856 | -0.32375586 |
| O  | 2.60918701  | 2.34357044  | -0.67739886 |
| O  | 1.40503301  | 1.18301844  | 1.81654314  |
| S  | -1.46451499 | -2.72887056 | -0.00638386 |
| S  | -3.91798699 | 3.23258344  | 0.44900514  |
| S  | -6.51174399 | -1.80722256 | -0.46548086 |
| Pt | 1.02626301  | 0.97052044  | -0.33654986 |
| C  | 5.48994401  | -2.63148256 | -0.31784486 |
| F  | 6.11321201  | -1.60158156 | -0.90921986 |
| F  | 5.84532601  | -3.75480756 | -0.96174486 |
| F  | 5.98047301  | -2.72602256 | 0.93054614  |

**2-TS<sub>1</sub>**

|    |             |             |             |
|----|-------------|-------------|-------------|
| C  | 3.82691400  | -1.26674400 | 0.08171400  |
| H  | 4.41859100  | -0.35907000 | 0.15947900  |
| C  | 4.41425100  | -2.51977800 | -0.05875700 |
| C  | 3.57974700  | -3.63481000 | -0.15913900 |
| H  | 4.00753400  | -4.62558700 | -0.27885100 |
| C  | 2.20650600  | -3.46365200 | -0.13036000 |
| H  | 1.54118500  | -4.31429400 | -0.23983400 |
| C  | 1.67896700  | -2.17247500 | 0.01228000  |
| C  | 0.27507600  | -1.82670100 | -0.00437500 |
| C  | -0.16030800 | -0.51227200 | -0.08895100 |
| C  | -1.58948400 | -0.43195000 | -0.11889500 |
| C  | -2.20300800 | -1.67389300 | -0.07492000 |
| C  | -3.87447100 | 0.51251600  | 1.85594900  |
| H  | -4.81122500 | 0.01303900  | 1.57849600  |
| H  | -4.08116100 | 1.17867000  | 2.70025800  |
| H  | -3.17901000 | -0.26206800 | 2.19261600  |
| C  | -3.28177100 | 1.25409400  | 0.70486100  |
| C  | -2.29296800 | 0.85905600  | -0.16276000 |
| C  | -1.97641300 | 1.86887100  | -1.13042700 |
| H  | -1.21277500 | 1.73487600  | -1.89066000 |
| C  | -2.71730800 | 3.00625200  | -1.01446900 |
| C  | -2.65095400 | 4.24724700  | -1.84198100 |
| H  | -2.37804000 | 5.12466100  | -1.24279200 |
| H  | -3.60731500 | 4.46842100  | -2.33060500 |
| H  | -1.89280400 | 4.12682500  | -2.62180400 |
| C  | -4.30916800 | -0.56290500 | -2.13720000 |
| H  | -4.53573500 | 0.47107600  | -1.84945900 |
| H  | -4.92818600 | -0.82096900 | -3.00283900 |
| H  | -3.25892400 | -0.59053000 | -2.44145400 |
| C  | -4.53164900 | -1.50935100 | -1.00615100 |
| C  | -3.62237500 | -2.02006100 | -0.10593600 |
| C  | -4.22136800 | -2.93778300 | 0.82127100  |
| H  | -3.66090700 | -3.43174700 | 1.60932500  |
| C  | -5.56213400 | -3.10769000 | 0.64714800  |
| C  | -6.50109800 | -3.96234200 | 1.43218000  |
| H  | -6.98554600 | -4.71902100 | 0.80388800  |
| H  | -7.29329900 | -3.37016400 | 1.90501800  |
| H  | -5.95137500 | -4.48216600 | 2.22251200  |
| C  | 4.34012700  | 4.07806200  | -0.36004200 |
| H  | 5.15293300  | 3.55452000  | 0.15513600  |
| H  | 4.37917700  | 5.13922500  | -0.10416000 |
| H  | 4.51197800  | 3.95969700  | -1.43550600 |
| C  | 3.02754300  | 3.43364700  | 0.00712500  |
| C  | 2.02613400  | 4.22281000  | 0.59727000  |
| H  | 2.24645700  | 5.27509200  | 0.73627300  |
| C  | 0.77101500  | 3.77658700  | 1.03104000  |
| C  | -0.20694800 | 4.76798300  | 1.60885400  |
| H  | -1.17028700 | 4.64572700  | 1.10254100  |
| H  | 0.13361200  | 5.80196900  | 1.51483200  |
| H  | -0.37117100 | 4.53779300  | 2.66751400  |
| N  | 2.51147900  | -1.11161100 | 0.12988400  |
| O  | 2.94787600  | 2.19753500  | -0.27133100 |
| O  | 0.33376900  | 2.58163500  | 1.00147600  |
| S  | -1.03441200 | -2.96225000 | 0.01977800  |
| S  | -3.82548800 | 2.85627000  | 0.31595500  |
| S  | -6.11280000 | -2.13931100 | -0.68493500 |
| Pt | 1.25620100  | 0.89472300  | -0.05410400 |
| C  | 5.90143400  | -2.67751900 | -0.04531800 |
| F  | 6.52582700  | -1.53780700 | -0.37790100 |
| F  | 6.29875400  | -3.63097500 | -0.90433300 |
| F  | 6.35259200  | -3.03732800 | 1.16968000  |

**2-TS<sub>2</sub>**

|    |             |             |             |
|----|-------------|-------------|-------------|
| C  | -3.78851100 | -0.98207600 | 0.15253200  |
| H  | -4.29585400 | -0.02367700 | 0.15555800  |
| C  | -4.47250000 | -2.18525800 | 0.19867000  |
| C  | -3.74139600 | -3.38488900 | 0.17322900  |
| H  | -4.25955500 | -4.33839300 | 0.20958200  |
| C  | -2.36774400 | -3.33646100 | 0.11104800  |
| H  | -1.77679800 | -4.24632900 | 0.09554200  |
| C  | -1.71315500 | -2.08985200 | 0.07440900  |
| C  | -0.32358400 | -1.83755200 | 0.04048700  |
| C  | 0.11380500  | -0.50107300 | 0.06538700  |
| C  | 1.51900700  | -0.42995800 | 0.09193100  |
| C  | 2.14869000  | -1.72348000 | 0.09164100  |
| C  | 3.88396400  | 0.21654400  | -1.94185300 |
| H  | 4.95195600  | 0.00046800  | -2.05288300 |
| H  | 3.58834600  | 0.90705700  | -2.74064000 |
| H  | 3.32613800  | -0.71211200 | -2.07622100 |
| C  | 3.57938900  | 0.82365100  | -0.60589900 |
| C  | 2.34737600  | 0.75847000  | 0.09178700  |
| C  | 2.16028600  | 1.86429500  | 0.96619300  |
| H  | 1.29763300  | 1.94867300  | 1.61716100  |
| C  | 3.18314200  | 2.76825300  | 0.96163700  |
| C  | 3.34359900  | 3.98485000  | 1.80719400  |
| H  | 3.46939100  | 4.88988200  | 1.19975600  |
| H  | 4.21944500  | 3.91023600  | 2.46379100  |
| H  | 2.45855400  | 4.11848200  | 2.43669400  |
| C  | 4.31486200  | -0.40777600 | 2.05931000  |
| H  | 4.83299100  | 0.55457400  | 2.14899300  |
| H  | 4.73455500  | -1.08822300 | 2.81238100  |
| H  | 3.25984000  | -0.25369400 | 2.29449700  |
| C  | 4.46739600  | -0.98790100 | 0.68634300  |
| C  | 3.52410100  | -1.97077200 | 0.14945500  |
| C  | 4.19618400  | -3.08924500 | -0.42793500 |
| H  | 3.67390600  | -3.92916500 | -0.87695500 |
| C  | 5.50642000  | -2.95359500 | -0.50521900 |
| C  | 6.52195400  | -3.87579700 | -1.15354200 |
| H  | 7.27199100  | -4.23301600 | -0.43711600 |
| H  | 7.06342000  | -3.37448400 | -1.96541000 |
| H  | 6.00321700  | -4.74422500 | -1.56932600 |
| C  | -4.56454400 | 3.77522100  | -0.43699600 |
| H  | -5.13485400 | 3.30570100  | -1.24605100 |
| H  | -4.55044300 | 4.85662400  | -0.58882700 |
| H  | -5.08738400 | 3.54960900  | 0.49891300  |
| C  | -3.18515900 | 3.17556400  | -0.39110900 |
| C  | -2.06632200 | 4.00662200  | -0.55375800 |
| H  | -2.25653600 | 5.06146900  | -0.71423800 |
| C  | -0.72708700 | 3.60235600  | -0.54840800 |
| C  | 0.35689600  | 4.62065100  | -0.77399000 |
| H  | 1.04853600  | 4.60260500  | 0.07473600  |
| H  | -0.03566400 | 5.63090800  | -0.90646500 |
| H  | 0.93768400  | 4.33726900  | -1.65846600 |
| N  | -2.45639200 | -0.93126100 | 0.09358200  |
| O  | -3.15845000 | 1.91727000  | -0.20779500 |
| O  | -0.27484100 | 2.42043700  | -0.37042700 |
| S  | 0.96181100  | -3.01571100 | -0.00478200 |
| S  | 4.41798000  | 2.29796900  | -0.18284400 |
| S  | 6.10671000  | -1.44966200 | 0.21621700  |
| Pt | -1.39965800 | 0.77251300  | -0.07363100 |
| C  | -5.96369400 | -2.21267100 | 0.22979300  |
| F  | -6.48172900 | -2.60582000 | -0.94980900 |
| F  | -6.48576000 | -1.00860700 | 0.51019200  |
| F  | -6.41870300 | -3.08105300 | 1.15155500  |



**2-<sup>3</sup>MECP<sub>2</sub>**

|    |             |             |             |
|----|-------------|-------------|-------------|
| C  | -3.81980500 | -0.95758400 | 0.16884100  |
| H  | -4.31775700 | 0.00564900  | 0.17872100  |
| C  | -4.51319600 | -2.15440300 | 0.21920700  |
| C  | -3.79358900 | -3.35876300 | 0.18328800  |
| H  | -4.31905900 | -4.30804800 | 0.22367100  |
| C  | -2.41930700 | -3.32215200 | 0.10588100  |
| H  | -1.83724900 | -4.23750500 | 0.08127200  |
| C  | -1.75616200 | -2.08226800 | 0.06565100  |
| C  | -0.36242000 | -1.83695200 | 0.01783900  |
| C  | 0.08646800  | -0.50579100 | 0.05000100  |
| C  | 1.49674500  | -0.45355800 | 0.10907100  |
| C  | 2.09543100  | -1.74156600 | 0.04390200  |
| C  | 3.82438200  | 0.41259700  | -1.82454500 |
| H  | 3.29216300  | -0.48712000 | -2.15108300 |
| H  | 4.85005200  | 0.36452500  | -2.20222500 |
| H  | 3.32702900  | 1.28576200  | -2.25501200 |
| C  | 3.80122300  | 0.51267300  | -0.29656900 |
| C  | 2.38801600  | 0.68476200  | 0.23107900  |
| C  | 2.19079000  | 1.85068000  | 0.95369400  |
| H  | 1.24314000  | 2.08997900  | 1.42298200  |
| C  | 3.29151500  | 2.68677900  | 1.06044400  |
| C  | 3.37820200  | 3.98814700  | 1.77549900  |
| H  | 3.61194900  | 4.81504000  | 1.09066900  |
| H  | 4.16304700  | 3.97777500  | 2.54342100  |
| H  | 2.42613700  | 4.21272900  | 2.26685300  |
| C  | 4.41565400  | -0.65383200 | 1.91962900  |
| H  | 3.41652000  | -0.42933300 | 2.30623200  |
| H  | 5.10200800  | 0.14033300  | 2.22639800  |
| H  | 4.75260100  | -1.60108100 | 2.34982100  |
| C  | 4.36857900  | -0.77131300 | 0.38988300  |
| C  | 3.48405000  | -1.94567800 | 0.01379900  |
| C  | 4.20684500  | -3.09161700 | -0.35785300 |
| H  | 3.73887800  | -4.04835900 | -0.57349400 |
| C  | 5.55829400  | -2.89861000 | -0.51228400 |
| C  | 6.56428800  | -3.90735200 | -0.94284500 |
| H  | 7.32528100  | -4.06671600 | -0.16857900 |
| H  | 7.09007400  | -3.58187000 | -1.84923700 |
| H  | 6.07968100  | -4.86550800 | -1.15110900 |
| C  | -4.56506700 | 3.79683100  | -0.46494400 |
| H  | -5.14485800 | 3.32065600  | -1.26327800 |
| H  | -4.54474000 | 4.87599300  | -0.63106600 |
| H  | -5.08197600 | 3.58721300  | 0.47796700  |
| C  | -3.18959000 | 3.18852600  | -0.42178200 |
| C  | -2.06619300 | 4.01005600  | -0.60223700 |
| H  | -2.25035200 | 5.06402200  | -0.77487800 |
| C  | -0.73027600 | 3.59656700  | -0.60034300 |
| C  | 0.36012300  | 4.60144700  | -0.85349800 |
| H  | 1.08247400  | 4.56691200  | -0.03127700 |
| H  | -0.02192200 | 5.61832400  | -0.96400000 |
| H  | 0.90359600  | 4.31874500  | -1.76180500 |
| N  | -2.48704500 | -0.91938000 | 0.09546100  |
| O  | -3.16970900 | 1.93223700  | -0.22383200 |
| O  | -0.28498900 | 2.41376000  | -0.40715200 |
| S  | 0.91318800  | -3.01501900 | -0.03130400 |
| S  | 4.68977000  | 2.04919000  | 0.21232600  |
| S  | 6.06182500  | -1.25575300 | -0.18213800 |
| Pt | -1.41863400 | 0.77748100  | -0.08516600 |
| C  | -6.00538100 | -2.16820500 | 0.26477400  |
| F  | -6.51176900 | -0.96320900 | 0.56733800  |
| F  | -6.53675500 | -2.53898100 | -0.91533100 |
| F  | -6.45821400 | -3.04505500 | 1.17865500  |

**3-1GSo**

|    |             |             |             |
|----|-------------|-------------|-------------|
| Pt | 3.02790300  | -0.17840700 | 0.01117400  |
| S  | -0.41218600 | 2.66623000  | -0.11225900 |
| S  | -0.82412900 | -1.48058800 | 0.09061900  |
| S  | -5.79416400 | 2.59734100  | -0.80436700 |
| S  | -5.73871500 | -2.92341200 | 0.75866200  |
| C  | 2.34722100  | -4.40284400 | 0.26623300  |
| O  | 5.03297500  | -0.81430600 | 0.03095100  |
| O  | 2.35742600  | -2.07611000 | 0.12857200  |
| N  | 3.51019600  | 1.77816400  | -0.10281200 |
| C  | 4.76675600  | 2.23836700  | -0.14066200 |
| H  | 5.53821000  | 1.47605500  | -0.10776200 |
| C  | 5.05168600  | 3.59177300  | -0.21626000 |
| H  | 6.08311700  | 3.92433100  | -0.24515300 |
| C  | 3.98861800  | 4.49589000  | -0.25327900 |
| H  | 4.17734000  | 5.56386600  | -0.31252300 |
| C  | 2.68698600  | 4.02441300  | -0.21396300 |
| H  | 1.84331700  | 4.70663900  | -0.24143700 |
| C  | 2.45252400  | 2.64698900  | -0.13774800 |
| C  | 1.19297900  | 1.96805700  | -0.08966300 |
| C  | 1.22099900  | 0.58316300  | -0.01517100 |
| C  | -0.10565300 | 0.09061600  | 0.02991600  |
| C  | -1.09233700 | 1.07251500  | -0.00718600 |
| C  | -2.43229800 | 0.58552600  | -0.00963500 |
| C  | -2.43656700 | -0.79909100 | 0.05522600  |
| C  | -5.43633600 | 4.52142000  | 1.22670800  |
| H  | -5.54012300 | 5.37703500  | 0.54899800  |
| H  | -4.73867300 | 4.80446700  | 2.02059300  |
| H  | -6.41618600 | 4.34585500  | 1.68634700  |
| C  | -4.92645200 | 3.30953100  | 0.51913700  |
| C  | -3.78940200 | 2.59746500  | 0.76288100  |
| H  | -3.09475300 | 2.85356800  | 1.55754400  |
| C  | -3.60649700 | 1.46709600  | -0.10285300 |
| C  | -4.61869400 | 1.34232900  | -1.02571200 |
| C  | -4.78500100 | 0.33681400  | -2.11593200 |
| H  | -5.21474400 | 0.78929900  | -3.01590900 |
| H  | -5.43508300 | -0.49227200 | -1.81020600 |
| H  | -3.81240100 | -0.09033200 | -2.37751600 |
| C  | -4.87576300 | -0.59896000 | 2.05780300  |
| H  | -5.34294900 | -1.04874200 | 2.94023500  |
| H  | -5.52832800 | 0.20819500  | 1.70303400  |
| H  | -3.93001900 | -0.14246600 | 2.36458700  |
| C  | -4.62597900 | -1.61728900 | 0.99645200  |
| C  | -3.56785400 | -1.72467400 | 0.12055900  |
| C  | -3.66687900 | -2.88637800 | -0.71804800 |
| H  | -2.92696400 | -3.13386600 | -1.47347900 |
| C  | -4.78377400 | -3.63704400 | -0.50314800 |
| C  | -5.21363900 | -4.88713900 | -1.19718100 |
| H  | -6.17760400 | -4.76351500 | -1.70464200 |
| H  | -5.31455700 | -5.72732500 | -0.50004500 |
| H  | -4.47014700 | -5.16327700 | -1.95079900 |
| C  | 6.86389200  | -2.27530400 | 0.10442900  |
| C  | 5.37707700  | -2.03620000 | 0.10363000  |
| C  | 4.50884400  | -3.13781100 | 0.17902400  |
| H  | 4.97025300  | -4.11682100 | 0.23608900  |
| C  | 3.11062600  | -3.10924200 | 0.18638200  |
| H  | 7.31749800  | -1.73746100 | 0.94421400  |
| H  | 7.29777100  | -1.86467800 | -0.81412200 |
| H  | 7.12052200  | -3.33421300 | 0.17750700  |
| H  | 3.00494200  | -5.27054600 | 0.34727200  |
| H  | 1.67524000  | -4.37554500 | 1.13067300  |
| H  | 1.71992600  | -4.50943100 | -0.62573200 |

**3-1GSc**

|    |             |             |             |
|----|-------------|-------------|-------------|
| Pt | 3.10923600  | -0.18886200 | -0.00682500 |
| S  | -0.28939800 | 2.69025600  | 0.07253900  |
| S  | -0.70653500 | -1.50142700 | -0.05304800 |
| S  | -6.18754300 | 1.66401900  | -0.03397100 |
| S  | -6.12997700 | -1.97189300 | -0.00053300 |
| C  | 2.39321900  | -4.41177900 | -0.13367200 |
| O  | 5.10745000  | -0.84092500 | -0.02198500 |
| O  | 2.42411500  | -2.08232800 | -0.06807100 |
| N  | 3.61544000  | 1.76394300  | 0.05233100  |
| C  | 4.87793000  | 2.20894200  | 0.06703500  |
| H  | 5.63941000  | 1.43631500  | 0.04577500  |
| C  | 5.18028000  | 3.56020200  | 0.10631100  |
| H  | 6.21603400  | 3.88012500  | 0.11688000  |
| C  | 4.12945700  | 4.47892600  | 0.13100500  |
| H  | 4.33231000  | 5.54545000  | 0.16175200  |
| C  | 2.82173200  | 4.02324800  | 0.11573500  |
| H  | 1.98724600  | 4.71700500  | 0.13396000  |
| C  | 2.57010700  | 2.64748500  | 0.07584400  |
| C  | 1.30307100  | 1.98163400  | 0.05288100  |
| C  | 1.30740300  | 0.59208400  | 0.01613500  |
| C  | -0.02338200 | 0.11720400  | 0.00853500  |
| C  | -0.99122400 | 1.11000500  | 0.03467800  |
| C  | -2.34622700 | 0.63929800  | -0.02056800 |
| C  | -2.34397100 | -0.82673200 | 0.01641200  |
| C  | -5.68961000 | 4.42251900  | -0.02877700 |
| H  | -6.32035400 | 4.60974500  | -0.90663600 |
| H  | -4.89572000 | 5.17427600  | -0.00593300 |
| H  | -6.32225800 | 4.56029200  | 0.85683600  |
| C  | -5.10926000 | 3.05190800  | -0.06831900 |
| C  | -3.79309900 | 2.71875900  | -0.11761300 |
| H  | -3.01384500 | 3.47507100  | -0.10799700 |
| C  | -3.53187400 | 1.31550000  | -0.13849500 |
| C  | -4.79625900 | 0.50662900  | -0.43032900 |
| C  | -4.83890700 | 0.23753800  | -1.94639100 |
| H  | -5.76511100 | -0.26533400 | -2.23469000 |
| H  | -3.99107200 | -0.38825500 | -2.24270900 |
| H  | -4.77393800 | 1.19077400  | -2.47834500 |
| C  | -4.86007500 | -0.49956900 | 1.93492400  |
| H  | -5.80858500 | -0.03350500 | 2.21250200  |
| H  | -4.03999700 | 0.15756100  | 2.24313500  |
| C  | -4.76502200 | -1.44953800 | 2.46820900  |
| H  | -4.78516500 | -0.76771600 | 0.42167300  |
| C  | -3.49210400 | -1.53792000 | 0.14568900  |
| C  | -3.70650700 | -2.95507900 | 0.14702600  |
| H  | -2.89496800 | -3.67719800 | 0.16621300  |
| C  | -5.00611300 | -3.32980600 | 0.07807700  |
| C  | -5.54783900 | -4.71668600 | 0.04929600  |
| H  | -6.15642500 | -4.88678300 | -0.84755200 |
| H  | -6.19205000 | -4.90809500 | 0.91637000  |
| H  | -4.73271700 | -5.44586900 | 0.05574600  |
| C  | 6.92764600  | -2.31666600 | -0.05798100 |
| C  | 5.44266500  | -2.06716800 | -0.05655700 |
| C  | 4.56601500  | -3.16368300 | -0.09187300 |
| H  | 5.01915800  | -4.14780900 | -0.11871900 |
| C  | 3.16805400  | -3.12321500 | -0.09565800 |
| H  | 7.37101500  | -1.87291800 | 0.84034900  |
| H  | 7.37894300  | -1.81624200 | -0.92186000 |
| H  | 7.17622700  | -3.37948800 | -0.09082700 |
| C  | 3.04352400  | -5.28775500 | -0.17658800 |
| H  | 1.75702300  | -4.47824800 | 0.75577800  |
| H  | 1.72966100  | -4.41037300 | -1.00511200 |

**3-<sup>3</sup>ESo**

|    |             |             |             |
|----|-------------|-------------|-------------|
| Pt | -3.02383600 | -0.17799000 | -0.01886000 |
| S  | 0.40786600  | 2.69717600  | 0.09791100  |
| S  | 0.79465100  | -1.51346700 | -0.13056400 |
| S  | 5.78706000  | 2.52473200  | 0.81606500  |
| S  | 5.81035100  | -2.82765200 | -0.66660200 |
| C  | -2.36059900 | -4.40792600 | -0.27441900 |
| O  | -5.03518100 | -0.80791100 | -0.01640200 |
| O  | -2.36212200 | -2.08477800 | -0.14296100 |
| N  | -3.50624100 | 1.76862200  | 0.10183300  |
| C  | -4.75424000 | 2.24029000  | 0.15213300  |
| H  | -5.53451700 | 1.48633700  | 0.12175500  |
| C  | -5.03504900 | 3.59638100  | 0.23820800  |
| C  | -3.96609500 | 4.51670300  | 0.27517100  |
| H  | -4.16230100 | 5.58229500  | 0.34349800  |
| C  | -2.67462100 | 4.05072300  | 0.22379300  |
| H  | -1.82892800 | 4.73132500  | 0.24968200  |
| C  | -2.42921500 | 2.65880400  | 0.13442000  |
| C  | -1.19747200 | 2.00571200  | 0.07044100  |
| C  | -1.21875900 | 0.53974800  | -0.01578600 |
| C  | 0.07090700  | 0.07274900  | -0.06419900 |
| C  | 1.09000400  | 1.06346100  | -0.02472200 |
| C  | 2.39409300  | 0.59189000  | -0.01769500 |
| C  | 2.41428400  | -0.82673400 | -0.09832100 |
| C  | 5.45335900  | 4.50409500  | -1.16586400 |
| H  | 5.57535600  | 5.34158600  | -0.46896300 |
| H  | 4.75794400  | 4.81703800  | -1.95042600 |
| H  | 6.42807700  | 4.31898800  | -1.63235800 |
| C  | 4.92371700  | 3.28678500  | -0.48333600 |
| C  | 3.77022900  | 2.60545800  | -0.73627900 |
| H  | 3.07615000  | 2.89017500  | -1.52149600 |
| C  | 3.57415700  | 1.45780400  | 0.10167100  |
| C  | 4.58969400  | 1.28723200  | 1.01379700  |
| C  | 4.74685600  | 0.24516200  | 2.07087400  |
| H  | 5.14300200  | 0.67235500  | 2.99812900  |
| H  | 5.42210100  | -0.55742900 | 1.74958400  |
| H  | 3.77744300  | -0.21099200 | 2.28929300  |
| C  | 4.99521200  | -0.46545400 | -1.91766200 |
| H  | 5.51176400  | -0.87385000 | -2.79302300 |
| H  | 5.62683500  | 0.32233900  | -1.48861700 |
| H  | 4.06898900  | 0.00714200  | -2.25628600 |
| C  | 4.68530600  | -1.53691700 | -0.92706100 |
| C  | 3.54968100  | -1.72277200 | -0.15721300 |
| C  | 3.60449100  | -2.94307500 | 0.60391400  |
| H  | 2.80920200  | -3.25518400 | 1.27423900  |
| C  | 4.75918800  | -3.64629500 | 0.45079100  |
| C  | 5.16595300  | -4.92170200 | 1.11065900  |
| H  | 6.06988500  | -4.79590800 | 1.71820200  |
| H  | 5.36872700  | -5.71213800 | 0.37848100  |
| H  | 4.36290800  | -5.26824500 | 1.76788300  |
| C  | -6.86973100 | -2.25981000 | -0.06441300 |
| C  | -5.38202700 | -2.02925200 | -0.08212600 |
| C  | -4.51953100 | -3.13551700 | -0.16495600 |
| H  | -4.98616600 | -4.11245600 | -0.21399300 |
| C  | -3.12088200 | -3.11319300 | -0.18908600 |
| H  | -7.32802100 | -1.71727400 | -0.89852300 |
| H  | -7.28709800 | -1.84395800 | 0.85936600  |
| H  | -7.13678300 | -3.31650000 | -0.13356100 |
| H  | -3.01739300 | -5.27729000 | -0.34555900 |
| H  | -1.69840400 | -4.37987800 | -1.14631500 |
| H  | -1.72284200 | -4.50890900 | 0.61070800  |
| H  | -6.06694800 | 3.92606100  | 0.27609500  |

**3-<sup>3</sup>ESc**

|    |             |             |             |
|----|-------------|-------------|-------------|
| Pt | -3.12016800 | -0.18503200 | -0.01008500 |
| S  | 0.29144200  | 2.69677500  | 0.09070300  |
| S  | 0.69912600  | -1.47293100 | -0.09509200 |
| S  | 6.21340500  | 1.64444000  | 0.14894100  |
| S  | 6.14323200  | -1.96152600 | 0.02570700  |
| C  | -2.36892700 | -4.39742000 | -0.23072500 |
| O  | -5.11498400 | -0.85423900 | -0.01825100 |
| O  | -2.42298900 | -2.07348800 | -0.11408700 |
| N  | -3.62611000 | 1.76657800  | 0.09216800  |
| C  | -4.88744400 | 2.21408700  | 0.12992100  |
| H  | -5.65141800 | 1.44389500  | 0.10245700  |
| C  | -5.18722900 | 3.56450100  | 0.19928000  |
| H  | -6.22219800 | 3.88561100  | 0.22839600  |
| C  | -4.13321800 | 4.48163000  | 0.22999700  |
| H  | -4.33450200 | 5.54757500  | 0.28432000  |
| C  | -2.82709900 | 4.02581900  | 0.19051100  |
| H  | -1.99061100 | 4.71708200  | 0.21264100  |
| C  | -2.57576200 | 2.64953000  | 0.12052100  |
| C  | -1.31212600 | 1.98746600  | 0.07225300  |
| C  | -1.32429800 | 0.59675000  | 0.00443800  |
| C  | -0.00366700 | 0.11390800  | -0.03933700 |
| C  | 0.98602000  | 1.10786400  | -0.00670200 |
| C  | 2.30813500  | 0.61892600  | -0.01565000 |
| C  | 2.30820100  | -0.79066500 | -0.07692400 |
| C  | 5.77890500  | 4.30603300  | -0.65155900 |
| H  | 6.34042200  | 4.73437700  | 0.18942700  |
| H  | 4.99312000  | 5.01460700  | -0.93059800 |
| H  | 6.47784700  | 4.22223800  | -1.49444900 |
| C  | 5.18325500  | 2.98910000  | -0.30209300 |
| C  | 3.83835700  | 2.64036600  | -0.29863600 |
| H  | 3.07361000  | 3.35217300  | -0.59888100 |
| C  | 3.56274400  | 1.32853100  | 0.05152000  |
| C  | 4.77862800  | 0.52318200  | 0.46853100  |
| C  | 4.73771600  | 0.21151100  | 1.96981900  |
| H  | 5.64923700  | -0.30405900 | 2.28634300  |
| H  | 3.87817500  | -0.42756800 | 2.19732800  |
| H  | 4.64195400  | 1.14184500  | 2.53594700  |
| C  | 4.88336400  | -0.47301400 | -1.89940300 |
| H  | 5.83654200  | 0.00750700  | -2.13858300 |
| H  | 4.06756200  | 0.19349400  | -2.19796100 |
| H  | 4.80159200  | -1.40320500 | -2.46838200 |
| C  | 4.78700000  | -0.77601100 | -0.39877300 |
| C  | 3.50576400  | -1.53978300 | -0.10946000 |
| C  | 3.70625400  | -2.90258100 | 0.13794100  |
| H  | 2.89164800  | -3.60545000 | 0.29211200  |
| C  | 5.02340800  | -3.29128700 | 0.24377200  |
| C  | 5.53988900  | -4.65493400 | 0.53928100  |
| H  | 6.15758100  | -4.66035500 | 1.44656700  |
| H  | 6.16624300  | -5.03326900 | -0.27879400 |
| H  | 4.70969100  | -5.35214300 | 0.68540600  |
| C  | -6.92355400 | -2.33939400 | -0.07064700 |
| C  | -5.44035100 | -2.08183600 | -0.07759600 |
| C  | -4.55600800 | -3.17186700 | -0.14534600 |
| H  | -5.00219800 | -4.15849600 | -0.19074300 |
| C  | -3.15882100 | -3.11990100 | -0.15894000 |
| H  | -7.38419300 | -1.81489500 | -0.91495600 |
| H  | -7.35721100 | -1.92159400 | 0.84466300  |
| H  | -7.16999300 | -3.40161200 | -0.13073800 |
| H  | -3.00597200 | -5.28202800 | -0.29282800 |
| H  | -1.70841100 | -4.36379100 | -1.10382000 |
| H  | -1.72900700 | -4.47490000 | 0.65519900  |

**3-<sup>3</sup>MC**

|    |             |             |             |
|----|-------------|-------------|-------------|
| Pt | -2.85008700 | -0.61619300 | -0.56206000 |
| S  | 0.41362800  | 2.43777800  | 0.09729600  |
| S  | 1.06514700  | -1.64046700 | -0.43615600 |
| S  | 5.79261500  | 2.48732500  | 1.17315400  |
| S  | 6.13754300  | -2.70196800 | -0.79318100 |
| C  | -4.72433700 | -1.18038800 | 3.45135500  |
| O  | -4.70264100 | -1.53020500 | -1.04888200 |
| O  | -3.38445100 | -0.87332700 | 1.56807200  |
| N  | -3.48008600 | 1.53210600  | -0.31195200 |
| C  | -4.72349100 | 2.00419100  | -0.29896600 |
| H  | -5.50919400 | 1.27079000  | -0.45770900 |
| C  | -4.99800300 | 3.34900200  | -0.08912800 |
| C  | -3.92049900 | 4.21375500  | 0.10943500  |
| H  | -4.09209500 | 5.27362900  | 0.27460400  |
| C  | -2.62599700 | 3.71809300  | 0.09883600  |
| H  | -1.77629200 | 4.37547900  | 0.25568300  |
| C  | -2.41717700 | 2.34815400  | -0.11176400 |
| C  | -1.14667600 | 1.66656700  | -0.13365200 |
| C  | -1.08831600 | 0.29418800  | -0.32625000 |
| C  | 0.26618000  | -0.11440900 | -0.28941200 |
| C  | 1.19354000  | 0.90119400  | -0.07962900 |
| C  | 2.55133700  | 0.47368600  | -0.01049300 |
| C  | 2.63382200  | -0.89590900 | -0.20769000 |
| C  | 5.44666000  | 4.62105500  | -0.63918200 |
| H  | 5.49676800  | 5.39532100  | 0.13546500  |
| H  | 4.76970000  | 4.97241500  | -1.42366600 |
| H  | 6.44820300  | 4.52610000  | -1.07507300 |
| C  | 4.95134900  | 3.32193300  | -0.09551700 |
| C  | 3.84859900  | 2.61143500  | -0.46677900 |
| H  | 3.17658800  | 2.93556900  | -1.25597200 |
| C  | 3.67264500  | 1.38381100  | 0.25499200  |
| C  | 4.65118600  | 1.18190000  | 1.20012100  |
| C  | 4.81137300  | 0.05496800  | 2.16472300  |
| H  | 5.17595800  | 0.40656300  | 3.13563600  |
| H  | 5.51131600  | -0.70271600 | 1.79085800  |
| H  | 3.84765400  | -0.43996700 | 2.31580900  |
| C  | 5.20111600  | -0.32296400 | -1.93956700 |
| H  | 5.76611300  | -0.63751100 | -2.82326700 |
| H  | 5.76277100  | 0.47676000  | -1.44109300 |
| H  | 4.25083500  | 0.10604400  | -2.27052800 |
| C  | 4.94214200  | -1.46906400 | -1.02113400 |
| C  | 3.82194200  | -1.74410800 | -0.26777900 |
| C  | 3.94033600  | -2.97238200 | 0.46576700  |
| H  | 3.15797600  | -3.34835600 | 1.11819900  |
| C  | 5.13312800  | -3.60869500 | 0.29538400  |
| C  | 5.60224400  | -4.88503300 | 0.91128700  |
| H  | 6.49995100  | -4.73758300 | 1.52317600  |
| H  | 5.84072300  | -5.64012100 | 0.15301300  |
| H  | 4.81749900  | -5.29144200 | 1.55627100  |
| C  | -6.87969900 | -2.36938500 | -0.88194200 |
| C  | -5.64145500 | -1.80178100 | -0.23523500 |
| C  | -5.62525600 | -1.63489900 | 1.15771600  |
| H  | -6.53303800 | -1.90197500 | 1.68641400  |
| C  | -4.54251100 | -1.22065600 | 1.95250200  |
| H  | -6.63298100 | -3.33458500 | -1.33850000 |
| H  | -7.20431900 | -1.70612600 | -1.69059000 |
| H  | -7.70079300 | -2.51156200 | -0.17579000 |
| H  | -5.73442900 | -1.45689100 | 3.76203200  |
| H  | -4.00523900 | -1.86221000 | 3.91787100  |
| H  | -4.49474000 | -0.17279400 | 3.81357300  |
| H  | -6.02277500 | 3.70352400  | -0.08140700 |

**3-<sup>3</sup>MECP<sub>1</sub>**

|    |             |             |             |
|----|-------------|-------------|-------------|
| Pt | -2.85008700 | -0.61619300 | -0.56206000 |
| S  | 0.41362800  | 2.43777800  | 0.09729600  |
| S  | 1.06514700  | -1.64046700 | -0.43615600 |
| S  | 5.79261500  | 2.48732500  | 1.17315400  |
| S  | 6.13754300  | -2.70196800 | -0.79318100 |
| C  | -4.72433700 | -1.18038800 | 3.45135500  |
| O  | -4.70264100 | -1.53020500 | -1.04888200 |
| O  | -3.38445100 | -0.87332700 | 1.56807200  |
| N  | -3.48008600 | 1.53210600  | -0.31195200 |
| C  | -4.72349100 | 2.00419100  | -0.29896600 |
| H  | -5.50919400 | 1.27079000  | -0.45770900 |
| C  | -4.99800300 | 3.34900200  | -0.08912800 |
| C  | -3.92049900 | 4.21375500  | 0.10943500  |
| H  | -4.09209500 | 5.27362900  | 0.27460400  |
| C  | -2.62599700 | 3.71809300  | 0.09883600  |
| H  | -1.77629200 | 4.37547900  | 0.25568300  |
| C  | -2.41717700 | 2.34815400  | -0.11176400 |
| C  | -1.14667600 | 1.66656700  | -0.13365200 |
| C  | -1.08831600 | 0.29418800  | -0.32625000 |
| C  | 0.26618000  | -0.11440900 | -0.28941200 |
| C  | 1.19354000  | 0.90119400  | -0.07962900 |
| C  | 2.55133700  | 0.47368600  | -0.01049300 |
| C  | 2.63382200  | -0.89590900 | -0.20769000 |
| C  | 5.44666000  | 4.62105500  | -0.63918200 |
| H  | 5.49676800  | 5.39532100  | 0.13546500  |
| H  | 4.76970000  | 4.97241500  | -1.42366600 |
| H  | 6.44820300  | 4.52610000  | -1.07507300 |
| C  | 4.95134900  | 3.32193300  | -0.09551700 |
| C  | 3.84859900  | 2.61143500  | -0.46677900 |
| H  | 3.17658800  | 2.93556900  | -1.25597200 |
| C  | 3.67264500  | 1.38381100  | 0.25499200  |
| C  | 4.65118600  | 1.18190000  | 1.20012100  |
| C  | 4.81137300  | 0.05496800  | 2.16472300  |
| H  | 5.17595800  | 0.40656300  | 3.13563600  |
| H  | 5.51131600  | -0.70271600 | 1.79085800  |
| H  | 3.84765400  | -0.43996700 | 2.31580900  |
| C  | 5.20111600  | -0.32296400 | -1.93956700 |
| H  | 5.76611300  | -0.63751100 | -2.82326700 |
| H  | 5.76277100  | 0.47676000  | -1.44109300 |
| H  | 4.25083500  | 0.10604400  | -2.27052800 |
| C  | 4.94214200  | -1.46906400 | -1.02113400 |
| C  | 3.82194200  | -1.74410800 | -0.26777900 |
| C  | 3.94033600  | -2.97238200 | 0.46576700  |
| H  | 3.15797600  | -3.34835600 | 1.11819900  |
| C  | 5.13312800  | -3.60869500 | 0.29538400  |
| C  | 5.60224400  | -4.88503300 | 0.91128700  |
| H  | 6.49995100  | -4.73758300 | 1.52317600  |
| H  | 5.84072300  | -5.64012100 | 0.15301300  |
| H  | 4.81749900  | -5.29144200 | 1.55627100  |
| C  | -6.87969900 | -2.36938500 | -0.88194200 |
| C  | -5.64145500 | -1.80178100 | -0.23523500 |
| C  | -5.62525600 | -1.63489900 | 1.15771600  |
| H  | -6.53303800 | -1.90197500 | 1.68641400  |
| C  | -4.54251100 | -1.22065600 | 1.95250200  |
| H  | -6.63298100 | -3.33458500 | -1.33850000 |
| H  | -7.20431900 | -1.70612600 | -1.69059000 |
| H  | -7.70079300 | -2.51156200 | -0.17579000 |
| H  | -5.73442900 | -1.45689100 | 3.76203200  |
| H  | -4.00523900 | -1.86221000 | 3.91787100  |
| H  | -4.49474000 | -0.17279400 | 3.81357300  |
| H  | -6.02277500 | 3.70352400  | -0.08140700 |

**3-TS<sub>1</sub>**

|    |             |             |             |
|----|-------------|-------------|-------------|
| Pt | -3.01718800 | -0.20295400 | -0.22912300 |
| S  | 0.45983200  | 2.66362800  | 0.24300000  |
| S  | 0.78251900  | -1.44732700 | -0.33174200 |
| S  | 5.87709900  | 2.33841400  | 0.98177800  |
| S  | 5.74730900  | -2.87602900 | -0.92584800 |
| C  | -2.86718900 | -4.43279800 | 1.28244200  |
| O  | -4.98210900 | -0.93003600 | -0.58745000 |
| O  | -2.59378000 | -2.21329900 | 0.59805700  |
| N  | -3.50902700 | 2.07925100  | 0.28712100  |
| C  | -4.69477000 | 2.67773900  | 0.32696500  |
| H  | -5.55598900 | 2.01522500  | 0.35564800  |
| C  | -4.82826200 | 4.06203300  | 0.34593100  |
| C  | -3.66541600 | 4.82974000  | 0.30871200  |
| H  | -3.72289200 | 5.91448000  | 0.32033900  |
| C  | -2.42766900 | 4.20373200  | 0.24346200  |
| H  | -1.51294900 | 4.78603700  | 0.18504300  |
| C  | -2.36917600 | 2.80511100  | 0.22872500  |
| C  | -1.16348900 | 2.00887800  | 0.12007500  |
| C  | -1.21434000 | 0.63849000  | -0.09713900 |
| C  | 0.10870900  | 0.13382000  | -0.15044000 |
| C  | 1.11758800  | 1.07737800  | 0.00126500  |
| C  | 2.44194500  | 0.55324200  | -0.00637300 |
| C  | 2.41117100  | -0.81949900 | -0.20029200 |
| C  | 5.58426600  | 4.47944500  | -0.83182400 |
| H  | 5.72310800  | 5.25579500  | -0.07016400 |
| H  | 4.89552900  | 4.86840700  | -1.58782200 |
| H  | 6.55519800  | 4.31322900  | -1.31325000 |
| C  | 5.02958500  | 3.22188100  | -0.24918100 |
| C  | 3.86158800  | 2.58826500  | -0.55405700 |
| H  | 3.17282400  | 2.95316900  | -1.31036500 |
| C  | 3.63883100  | 1.38115900  | 0.18900400  |
| C  | 4.65011300  | 1.11663600  | 1.08253700  |
| C  | 4.78169700  | -0.01206500 | 2.04938900  |
| H  | 5.21474300  | 0.32109100  | 2.99848900  |
| H  | 5.41180200  | -0.81689300 | 1.65058500  |
| H  | 3.79586000  | -0.44099100 | 2.25097700  |
| C  | 4.92845600  | -0.44795900 | -2.05948200 |
| H  | 5.42071100  | -0.81186300 | -2.96749200 |
| H  | 5.57500400  | 0.31059200  | -1.60085200 |
| H  | 3.99747200  | 0.04967400  | -2.34614700 |
| C  | 4.63180600  | -1.56371300 | -1.11541600 |
| C  | 3.53096400  | -1.75172200 | -0.30909800 |
| C  | 3.59730200  | -2.97730900 | 0.43540300  |
| H  | 2.82212300  | -3.28938700 | 1.12886800  |
| C  | 4.73361900  | -3.69786100 | 0.22031500  |
| C  | 5.14171600  | -4.99563700 | 0.83497500  |
| H  | 6.07626800  | -4.90321900 | 1.40076200  |
| H  | 5.28965100  | -5.77647300 | 0.07971400  |
| H  | 4.36305100  | -5.33631800 | 1.52395100  |
| C  | -6.91027400 | -2.25255100 | -0.67506200 |
| C  | -5.46243500 | -2.06947000 | -0.29636300 |
| C  | -4.78251000 | -3.13849500 | 0.31055900  |
| H  | -5.35355800 | -4.04417200 | 0.48019900  |
| C  | -3.43422600 | -3.16484500 | 0.69343500  |
| H  | -7.01598600 | -2.12846400 | -1.75852100 |
| H  | -7.50895900 | -1.46732900 | -0.20100800 |
| H  | -7.30521100 | -3.22936500 | -0.38722100 |
| H  | -3.59658900 | -5.24516500 | 1.32287800  |
| H  | -2.00505200 | -4.74943100 | 0.68587100  |
| H  | -2.49989900 | -4.22489500 | 2.29333800  |
| H  | -5.81106900 | 4.51791500  | 0.39728000  |

**3-TS<sub>2</sub>**

|    |             |             |             |
|----|-------------|-------------|-------------|
| Pt | -3.08708600 | -0.17999500 | -0.01291900 |
| S  | 0.33041000  | 2.69252700  | 0.09451800  |
| S  | 0.72017800  | -1.49287500 | -0.09979300 |
| S  | 6.04114100  | 1.94050800  | 0.62484700  |
| S  | 6.06342200  | -2.19514700 | -0.34465800 |
| C  | -2.35289300 | -4.39511600 | -0.23189000 |
| O  | -5.08533800 | -0.84176100 | -0.01540600 |
| O  | -2.39861800 | -2.07114600 | -0.11867700 |
| N  | -3.58666400 | 1.77258700  | 0.09202900  |
| C  | -4.84616400 | 2.22452000  | 0.13067000  |
| H  | -5.61282900 | 1.45702300  | 0.10192300  |
| C  | -5.14177200 | 3.57586500  | 0.20264700  |
| C  | -4.08464500 | 4.49032900  | 0.23566000  |
| H  | -4.28289800 | 5.56716000  | 0.29228700  |
| C  | -2.78043900 | 4.03074000  | 0.19536600  |
| H  | -1.94172500 | 4.71931100  | 0.21888000  |
| C  | -2.53283500 | 2.65306200  | 0.12216700  |
| C  | -1.27267300 | 1.98853700  | 0.07222200  |
| C  | -1.28707000 | 0.59378900  | -0.00314300 |
| C  | 0.02804300  | 0.10867400  | -0.05642400 |
| C  | 1.02120100  | 1.10038800  | -0.02335900 |
| C  | 2.34171100  | 0.61887000  | 0.00897600  |
| C  | 2.35092300  | -0.81340900 | -0.11041600 |
| C  | 5.72994100  | 4.26018200  | -0.94924900 |
| H  | 6.18673900  | 4.91352100  | -0.19608300 |
| H  | 4.97564900  | 4.83984400  | -1.48937800 |
| H  | 6.51784500  | 3.98043200  | -1.65961700 |
| C  | 5.09983700  | 3.06010100  | -0.33063300 |
| C  | 3.81056100  | 2.62662100  | -0.44759200 |
| H  | 3.07270800  | 3.15006800  | -1.04879700 |
| C  | 3.55067600  | 1.37505800  | 0.18386000  |
| C  | 4.69452500  | 0.84546100  | 0.83857500  |
| C  | 4.71058100  | -0.02011600 | 2.06284400  |
| H  | 4.67381700  | 0.60427800  | 2.96396600  |
| H  | 5.61646000  | -0.63437300 | 2.10953500  |
| H  | 3.84462600  | -0.68419200 | 2.07656500  |
| C  | 4.92428100  | -0.24851300 | -1.95767400 |
| H  | 5.00399900  | -0.91984400 | -2.82343300 |
| H  | 5.82140300  | 0.38178600  | -1.93577500 |
| H  | 4.05568300  | 0.39525500  | -2.11044700 |
| C  | 4.77872300  | -1.03711700 | -0.69259900 |
| C  | 3.50195700  | -1.59565900 | -0.24386400 |
| C  | 3.63703800  | -2.95221500 | 0.18394700  |
| H  | 2.80254000  | -3.54179000 | 0.55300500  |
| C  | 4.91988400  | -3.40595500 | 0.22833200  |
| C  | 5.40996400  | -4.71654300 | 0.73497200  |
| H  | 6.09553800  | -4.58475700 | 1.58153200  |
| H  | 5.95609900  | -5.26781800 | -0.04062700 |
| H  | 4.56942100  | -5.33265000 | 1.06616500  |
| C  | -6.89976900 | -2.31995200 | -0.06419000 |
| C  | -5.41547000 | -2.06810700 | -0.07442400 |
| C  | -4.53569100 | -3.16150600 | -0.14446500 |
| H  | -4.98571100 | -4.14645700 | -0.18887600 |
| C  | -3.13813400 | -3.11467200 | -0.16101100 |
| H  | -7.36030700 | -1.79359000 | -0.90740400 |
| H  | -7.32981300 | -1.90064800 | 0.85214400  |
| H  | -7.15049400 | -3.38121700 | -0.12389100 |
| H  | -2.99290800 | -5.27684400 | -0.30413000 |
| H  | -1.68331800 | -4.35939000 | -1.09783700 |
| H  | -1.72193300 | -4.47939800 | 0.65989000  |
| H  | -6.17579000 | 3.89998600  | 0.23211700  |

**3-<sup>3</sup>MECP<sub>2</sub>**

|    |             |             |             |
|----|-------------|-------------|-------------|
| Pt | 2.43005900  | 0.94300500  | -0.05469600 |
| S  | -0.46525600 | -2.45836000 | 0.06640100  |
| S  | -1.56390800 | 1.57992800  | -0.11085400 |
| S  | -6.48601200 | -2.40365600 | 0.14143700  |
| S  | -7.01191800 | 1.15870700  | 0.08774900  |
| C  | 1.02240800  | 4.98031000  | -0.22567400 |
| O  | 4.27834000  | 1.91682000  | -0.07022400 |
| O  | 1.46130300  | 2.69598700  | -0.13479200 |
| N  | 3.24445400  | -0.89658600 | 0.02618400  |
| C  | 4.55766100  | -1.13006400 | 0.05084600  |
| H  | 5.19552200  | -0.24334100 | 0.01945900  |
| C  | 4.18251100  | -3.50075000 | 0.12693200  |
| H  | 4.56462300  | -4.52379900 | 0.15474300  |
| C  | 2.82417400  | -3.26155800 | 0.10060600  |
| H  | 2.10755300  | -4.08407700 | 0.10905400  |
| C  | 2.34750600  | -1.93753200 | 0.05430700  |
| C  | 0.99816300  | -1.49454400 | 0.02557800  |
| C  | 0.78367500  | -0.11336700 | -0.03342500 |
| C  | -0.59915100 | 0.14237200  | -0.05670800 |
| C  | -1.41203000 | -1.00778100 | -0.01214300 |
| C  | -2.79543800 | -0.74365400 | -0.01418300 |
| C  | -3.02710300 | 0.64082700  | -0.07251500 |
| C  | -5.64204000 | -4.93687900 | -0.73959000 |
| H  | -6.10454200 | -5.47316700 | 0.10727400  |
| H  | -4.75339700 | -5.50264600 | -1.05404500 |
| H  | -6.37215000 | -4.95677700 | -1.56712600 |
| C  | -5.26296900 | -3.54924600 | -0.36879600 |
| C  | -3.98864900 | -2.97836100 | -0.36305300 |
| H  | -3.11171100 | -3.53993400 | -0.69684100 |
| C  | -3.92833100 | -1.65779600 | 0.04421500  |
| C  | -5.25309600 | -1.07203800 | 0.48398200  |
| C  | -5.27946600 | -0.77420700 | 1.98441100  |
| H  | -6.27202600 | -0.41001000 | 2.28815600  |
| H  | -4.53318700 | -0.00430700 | 2.23343900  |
| H  | -5.04591600 | -1.68677000 | 2.55001200  |
| C  | -5.56265100 | -0.08069300 | -1.86781800 |
| H  | -6.42897700 | -0.72464600 | -2.07858900 |
| H  | -4.64916500 | -0.59989500 | -2.19512700 |
| H  | -5.66225000 | 0.85256900  | -2.43937500 |
| C  | -5.48232100 | 0.22608000  | -0.37089000 |
| C  | -4.34740300 | 1.18516200  | -0.07413400 |
| C  | -4.76453600 | 2.48059300  | 0.23498400  |
| H  | -4.06780000 | 3.30153400  | 0.42163500  |
| C  | -6.13574500 | 2.64562600  | 0.35452000  |
| C  | -6.87246300 | 3.89271100  | 0.68860300  |
| H  | -7.48118600 | 3.77277500  | 1.60097300  |
| H  | -7.56450700 | 4.17857300  | -0.12175500 |
| H  | -6.17079700 | 4.72333500  | 0.84860600  |
| C  | 5.85108500  | 3.65034300  | -0.11917100 |
| C  | 4.42496800  | 3.17405400  | -0.11643700 |
| C  | 3.38246400  | 4.11991200  | -0.16376500 |
| H  | 3.67131500  | 5.16984200  | -0.19997300 |
| C  | 2.00698700  | 3.84681600  | -0.17052800 |
| H  | 6.37695900  | 3.20926500  | -0.98004000 |
| H  | 6.35696400  | 3.28141100  | 0.78649700  |
| H  | 5.93518900  | 4.74299400  | -0.16274900 |
| H  | 1.50842600  | 5.96299000  | -0.25125600 |
| H  | 0.38681900  | 4.86253700  | -1.11689600 |
| H  | 0.35664100  | 4.92308800  | 0.64932600  |
| C  | 5.07502600  | -2.41699500 | 0.10571700  |
| H  | 6.13379010  | -2.56957214 | 0.13099132  |

## 4-1GSo

|    |             |             |             |
|----|-------------|-------------|-------------|
| Pt | -2.32752600 | -0.97929900 | -0.04950900 |
| S  | 0.52127400  | 2.46038700  | 0.08349700  |
| S  | 1.68403700  | -1.54837900 | -0.09056100 |
| S  | 5.86750500  | 3.33460600  | 0.74505700  |
| S  | 6.83131200  | -1.95582700 | -0.65439400 |
| C  | -0.87981800 | -5.00024500 | -0.27710100 |
| O  | -4.17699300 | -1.96529800 | -0.09190200 |
| O  | -1.32271000 | -2.71958600 | -0.15062000 |
| N  | -3.16737700 | 0.85334900  | 0.04776500  |
| C  | -4.48594000 | 1.06755100  | 0.07229300  |
| H  | -5.10726700 | 0.17918600  | 0.03607900  |
| C  | -5.01435200 | 2.34489800  | 0.13564100  |
| C  | -4.14046000 | 3.43854800  | 0.17610600  |
| H  | -4.53392900 | 4.44961400  | 0.22259900  |
| C  | -2.77904800 | 3.21872200  | 0.15173100  |
| H  | -2.07911800 | 4.04715300  | 0.18123700  |
| C  | -2.28798900 | 1.90613600  | 0.08637600  |
| C  | -0.92904800 | 1.47834800  | 0.05332600  |
| C  | -0.69979600 | 0.10697800  | -0.01108100 |
| C  | 0.69227200  | -0.13332200 | -0.04213100 |
| C  | 1.47959800  | 1.01622700  | -0.00410800 |
| C  | 2.88385100  | 0.78204600  | 0.01004300  |
| C  | 3.14106100  | -0.57941400 | -0.04927000 |
| C  | 5.13557600  | 5.17310100  | -1.26533800 |
| H  | 5.11135200  | 6.03340000  | -0.58614100 |
| H  | 4.37982200  | 5.33386500  | -2.03997400 |
| H  | 6.11905500  | 5.16357800  | -1.74977000 |
| C  | 4.85530800  | 3.89302400  | -0.55022100 |
| C  | 3.84545600  | 3.00293900  | -0.76682000 |
| H  | 3.09698200  | 3.13808700  | -1.54209000 |
| C  | 3.87932000  | 1.85801900  | 0.09739000  |
| C  | 4.92269400  | 1.90173800  | 0.99207600  |
| C  | 5.28751400  | 0.92849800  | 2.06263400  |
| H  | 5.64467600  | 1.43821300  | 2.96364800  |
| H  | 6.06993200  | 0.23474200  | 1.73059100  |
| H  | 4.41298100  | 0.32819500  | 2.32992000  |
| C  | 5.52111700  | 0.12979000  | -1.99019600 |
| H  | 6.08116900  | -0.20709900 | -2.86874500 |
| H  | 5.99099800  | 1.04793500  | -1.61638400 |
| H  | 4.50644400  | 0.38963500  | -2.30543900 |
| C  | 5.46684600  | -0.92744200 | -0.93967200 |
| C  | 4.43159400  | -1.26255200 | -0.09458400 |
| C  | 4.75349300  | -2.37153900 | 0.75805300  |
| H  | 4.06244200  | -2.77017400 | 1.49470400  |
| C  | 6.01497800  | -2.85692100 | 0.58538500  |
| C  | 6.68752400  | -3.97653500 | 1.30820800  |
| H  | 7.58074300  | -3.63678700 | 1.84546900  |
| H  | 6.99800200  | -4.77521200 | 0.62440800  |
| H  | 5.99779800  | -4.40781600 | 2.03980700  |
| C  | -5.71649200 | -3.72690300 | -0.17395800 |
| C  | -4.29636800 | -3.23053500 | -0.15633500 |
| C  | -3.24265500 | -4.15810200 | -0.21076600 |
| H  | -3.51840700 | -5.20485500 | -0.26323600 |
| C  | -1.87351900 | -3.87460200 | -0.20723800 |
| H  | -6.23898300 | -3.29280500 | -1.03350100 |
| H  | -6.23161100 | -3.37647600 | 0.72715200  |
| H  | -5.78411600 | -4.81557900 | -0.22566800 |
| H  | -1.35812200 | -5.98080300 | -0.31874000 |
| H  | -0.24798600 | -4.86791700 | -1.16206700 |
| H  | -0.22170200 | -4.95485500 | 0.59735000  |
| C  | -6.49207500 | 2.56368800  | 0.18356200  |
| F  | -6.88316200 | 3.45148300  | -0.74730800 |
| F  | -7.17715900 | 1.42954100  | -0.02020600 |
| F  | -6.87798600 | 3.06034500  | 1.37248400  |

## 4-1GSc

|    |             |             |             |
|----|-------------|-------------|-------------|
| Pt | 2.42207700  | 0.93883200  | -0.03743300 |
| S  | -0.46458400 | -2.46692100 | 0.04816700  |
| S  | -1.55867400 | 1.58152200  | -0.07623100 |
| S  | -6.48260700 | -2.41246400 | 0.12489300  |
| S  | -7.01429000 | 1.15680800  | 0.05330900  |
| C  | 0.98397700  | 4.96988800  | -0.21301700 |
| O  | 4.27882800  | 1.92757500  | -0.05485200 |
| O  | 1.42229800  | 2.68625900  | -0.11654900 |
| N  | 3.24430800  | -0.90373400 | 0.03919800  |
| C  | 4.56260400  | -1.13615700 | 0.06422600  |
| H  | 5.18831500  | -0.24986400 | 0.04133100  |
| C  | 5.08182200  | -2.41943300 | 0.11559100  |
| C  | 4.19509600  | -3.49814300 | 0.14140800  |
| H  | 4.57019500  | -4.51660800 | 0.18179400  |
| C  | 2.83063200  | -3.26381400 | 0.11502700  |
| H  | 2.11997300  | -4.08391900 | 0.13393600  |
| C  | 2.35611900  | -1.94813300 | 0.06318600  |
| C  | 0.99793500  | -1.50246400 | 0.03097200  |
| C  | 0.78035800  | -0.12966800 | -0.01859900 |
| C  | -0.60476100 | 0.12860100  | -0.04747600 |
| C  | -1.41257300 | -1.01451300 | -0.02380400 |
| C  | -2.80276300 | -0.75069500 | -0.01664500 |
| C  | -3.03463400 | 0.64038800  | -0.05839200 |
| C  | -5.60314800 | -4.96590300 | -0.66605000 |
| H  | -6.09244900 | -5.48001000 | 0.17174800  |
| H  | -4.70959500 | -5.53556600 | -0.93892500 |
| H  | -6.30031100 | -4.99715900 | -1.51373600 |
| C  | -5.23543400 | -3.56852500 | -0.31348200 |
| C  | -3.96905600 | -3.00280700 | -0.30032400 |
| H  | -3.09415200 | -3.57771900 | -0.59272600 |
| C  | -3.91930000 | -1.65893400 | 0.04756800  |
| C  | -5.25567100 | -1.07115100 | 0.46519600  |
| C  | -5.26930500 | -0.77834700 | 1.97013700  |
| H  | -6.25498400 | -0.42729300 | 2.28951200  |
| H  | -4.52940600 | -0.00788500 | 2.21121000  |
| H  | -5.02068600 | -1.68769300 | 2.52387500  |
| C  | -5.52055800 | -0.07507100 | -1.88858200 |
| H  | -6.38105900 | -0.70289200 | -2.13741300 |
| H  | -4.60608000 | -0.59510700 | -2.19266000 |
| H  | -5.59166800 | 0.86278700  | -2.44632400 |
| C  | -5.47949100 | 0.22040600  | -0.38458100 |
| C  | -4.34376700 | 1.18303700  | -0.07794800 |
| C  | -4.76600100 | 2.48724400  | 0.19955800  |
| H  | -4.07840200 | 3.31103800  | 0.37277600  |
| C  | -6.13077100 | 2.65121700  | 0.30675300  |
| C  | -6.86767800 | 3.90262000  | 0.63023300  |
| H  | -7.47754000 | 3.78476600  | 1.53516300  |
| H  | -7.54819100 | 4.18966700  | -0.18170600 |
| H  | -6.16549100 | 4.72519100  | 0.79495700  |
| C  | 5.81732700  | 3.69094400  | -0.11059400 |
| C  | 4.39690000  | 3.19252800  | -0.10710300 |
| C  | 3.34432300  | 4.12201800  | -0.15837700 |
| H  | 3.62109900  | 5.16902900  | -0.19991100 |
| C  | 1.97479400  | 3.84019600  | -0.15947800 |
| H  | 6.35098700  | 3.25215000  | -0.96075300 |
| H  | 6.32157500  | 3.34759400  | 0.79951300  |
| H  | 5.88476300  | 4.77942900  | -0.16776700 |
| H  | 1.46538200  | 5.94779000  | -0.27740100 |
| H  | 0.32620500  | 4.83118500  | -1.07773000 |
| H  | 0.35215600  | 4.93680200  | 0.68145500  |
| C  | 6.60760600  | -2.62640300 | 0.14291500  |
| F  | 6.88169500  | -3.94726000 | 0.19498400  |
| F  | 7.15356600  | -2.09715700 | -0.97257800 |
| F  | 7.12509500  | -2.01622600 | 1.23029300  |

4-<sup>3</sup>ESo

|    |             |             |             |
|----|-------------|-------------|-------------|
| Pt | -2.32081400 | -0.98200500 | -0.05992200 |
| S  | 0.51353900  | 2.47851800  | 0.04590200  |
| S  | 1.68801300  | -1.58032600 | -0.11793600 |
| S  | 5.82163700  | 3.33920200  | 0.79170900  |
| S  | 6.86739300  | -1.92568100 | -0.58974700 |
| C  | -0.91854100 | -5.02672000 | -0.27338800 |
| O  | -4.18362200 | -1.95144000 | -0.06900500 |
| O  | -1.33010500 | -2.73978200 | -0.16126800 |
| N  | -3.15502400 | 0.84183300  | 0.03456000  |
| C  | -4.46673700 | 1.06890500  | 0.07124200  |
| H  | -5.09783000 | 0.18695900  | 0.04310100  |
| C  | -4.99147100 | 2.35056300  | 0.14070700  |
| C  | -4.11304600 | 3.46211300  | 0.17723600  |
| H  | -4.51147400 | 4.46996700  | 0.23267900  |
| C  | -2.76184400 | 3.24033500  | 0.13954300  |
| H  | -2.05929800 | 4.06765000  | 0.16579900  |
| C  | -2.26157200 | 1.91811900  | 0.06503300  |
| C  | -0.92848300 | 1.50039900  | 0.01679200  |
| C  | -0.67856600 | 0.05840000  | -0.05050000 |
| C  | 0.68001800  | -0.15895600 | -0.08148100 |
| C  | 1.49196100  | 1.00314900  | -0.04860600 |
| C  | 2.86307500  | 0.78637100  | -0.02329600 |
| C  | 3.14750900  | -0.60331900 | -0.08146500 |
| C  | 5.13184600  | 5.18792100  | -1.22402400 |
| H  | 5.09007900  | 6.04350400  | -0.53989200 |
| H  | 4.39367800  | 5.35192900  | -2.01463900 |
| H  | 6.12622500  | 5.18303900  | -1.68552300 |
| C  | 4.83819200  | 3.90303500  | -0.52332600 |
| C  | 3.83648500  | 3.01140200  | -0.76900200 |
| H  | 3.10742700  | 3.14636400  | -1.56256900 |
| C  | 3.85709100  | 1.86055400  | 0.08702200  |
| C  | 4.88019900  | 1.90029500  | 1.00613300  |
| C  | 5.22416700  | 0.92608400  | 2.08375600  |
| H  | 5.52357100  | 1.43816700  | 3.00424400  |
| H  | 6.04380200  | 0.26208700  | 1.78243300  |
| H  | 4.35864400  | 0.29665900  | 2.30805500  |
| C  | 5.62215000  | 0.20789200  | -1.89705900 |
| H  | 6.21518500  | -0.11048300 | -2.76103300 |
| H  | 6.08550700  | 1.11113400  | -1.48145700 |
| H  | 4.62485300  | 0.48490400  | -2.24960000 |
| C  | 5.51783800  | -0.88237400 | -0.88439300 |
| C  | 4.43362300  | -1.26805200 | -0.11459000 |
| C  | 4.71554800  | -2.43650600 | 0.67606600  |
| H  | 3.99005400  | -2.88023200 | 1.35120200  |
| C  | 5.98608300  | -2.90557600 | 0.54434300  |
| C  | 6.62796100  | -4.06099600 | 1.23729300  |
| H  | 7.48848500  | -3.74696000 | 1.83957100  |
| H  | 6.98155800  | -4.81649500 | 0.52593100  |
| H  | 5.90424000  | -4.53777700 | 1.90489000  |
| C  | -5.73734800 | -3.70063900 | -0.11229500 |
| C  | -4.31291500 | -3.21582600 | -0.12032600 |
| C  | -3.26894800 | -4.15431200 | -0.18133900 |
| H  | -3.55681400 | -5.19840500 | -0.22051600 |
| C  | -1.89615600 | -3.88673300 | -0.19956500 |
| H  | -6.27110900 | -3.26315000 | -0.96309500 |
| H  | -6.23340800 | -3.34408000 | 0.79712300  |
| H  | -5.81523300 | -4.78880300 | -0.16054900 |
| H  | -1.40981400 | -6.00144800 | -0.29709000 |
| H  | -0.29938500 | -4.91170700 | -1.16969800 |
| H  | -0.24604000 | -4.98061400 | 0.59001200  |
| C  | -6.46400900 | 2.57247400  | 0.19089000  |
| F  | -6.87195600 | 3.38932800  | -0.79935400 |
| F  | -7.15725100 | 1.42901800  | 0.08388100  |
| F  | -6.83617200 | 3.16339400  | 1.34298100  |

4-<sup>3</sup>ESc

|    |             |             |             |
|----|-------------|-------------|-------------|
| Pt | 2.42835900  | 0.94695300  | -0.04763900 |
| S  | -0.47161500 | -2.45180400 | 0.03136400  |
| S  | -1.57074800 | 1.59442600  | -0.06565600 |
| S  | -6.48643900 | -2.41110400 | 0.10627800  |
| S  | -7.02260800 | 1.16087700  | 0.07991800  |
| C  | 1.07786500  | 5.00690500  | -0.22795500 |
| O  | 4.29900900  | 1.88894800  | -0.07081200 |
| O  | 1.46027700  | 2.71032400  | -0.12863500 |
| N  | 3.23643600  | -0.89951800 | 0.02695500  |
| C  | 4.54989500  | -1.13615400 | 0.05318500  |
| H  | 5.18406700  | -0.25627400 | 0.02885800  |
| C  | 5.05946000  | -2.42360600 | 0.10036400  |
| C  | 4.16682100  | -3.50231000 | 0.12094100  |
| H  | 4.54276400  | -4.52033700 | 0.14998800  |
| C  | 2.80915300  | -3.25941700 | 0.09375400  |
| H  | 2.09748600  | -4.07829400 | 0.10536100  |
| C  | 2.33916000  | -1.93788900 | 0.04692000  |
| C  | 0.99002100  | -1.48633500 | 0.01549600  |
| C  | 0.77434200  | -0.10951300 | -0.02683800 |
| C  | -0.61060500 | 0.14474600  | -0.04907200 |
| C  | -1.41866500 | -0.99975500 | -0.02944900 |
| C  | -2.80915300 | -0.74130100 | -0.01721400 |
| C  | -3.04383100 | 0.65009900  | -0.04861300 |
| C  | -5.60220700 | -4.95988000 | -0.69648800 |
| H  | -6.08130100 | -5.48345900 | 0.14134800  |
| H  | -4.70838400 | -5.52302900 | -0.98143300 |
| H  | -6.30649900 | -4.98902000 | -1.53817300 |
| C  | -5.23754200 | -3.56331500 | -0.33668300 |
| C  | -3.97283700 | -2.99514400 | -0.31679800 |
| H  | -3.09690700 | -3.56780000 | -0.61130700 |
| C  | -3.92528600 | -1.65255500 | 0.04069900  |
| C  | -5.26350600 | -1.07089300 | 0.46294200  |
| C  | -5.28508500 | -0.79753200 | 1.97167000  |
| H  | -6.27404800 | -0.45539200 | 2.29052000  |
| H  | -4.54991700 | -0.02808600 | 2.23018300  |
| H  | -5.03714500 | -1.71342900 | 2.51495200  |
| C  | -5.54080900 | -0.04904500 | -1.88004100 |
| H  | -6.40444800 | -0.67223500 | -2.12912200 |
| H  | -4.63020900 | -0.56728200 | -2.19856300 |
| H  | -5.61566800 | 0.89436000  | -2.42799200 |
| C  | -5.48960100 | 0.22955500  | -0.37282600 |
| C  | -4.35423000 | 1.19069700  | -0.06034900 |
| C  | -4.77735500 | 2.49333100  | 0.22608600  |
| H  | -4.09102600 | 3.31746200  | 0.40248200  |
| C  | -6.14216600 | 2.65434800  | 0.33922200  |
| C  | -6.88061400 | 3.90273300  | 0.67173400  |
| H  | -7.48782500 | 3.77924800  | 1.57758300  |
| H  | -7.56405700 | 4.19283400  | -0.13651200 |
| H  | -6.18021800 | 4.72614200  | 0.83903600  |
| C  | 5.87716800  | 3.62095000  | -0.12478200 |
| C  | 4.44727800  | 3.15168700  | -0.11888300 |
| C  | 3.41462800  | 4.10252700  | -0.16522900 |
| H  | 3.71472800  | 5.14319900  | -0.20371900 |
| C  | 2.03920400  | 3.85195800  | -0.16909500 |
| H  | 6.39897100  | 3.18432200  | -0.98348500 |
| H  | 6.38175900  | 3.25841500  | 0.77761200  |
| H  | 5.96249300  | 4.70859900  | -0.16957800 |
| H  | 1.58686500  | 5.97238500  | -0.25184300 |
| H  | 0.44832500  | 4.90949700  | -1.11922100 |
| H  | 0.41318800  | 4.97057200  | 0.64199300  |
| C  | 6.53499000  | -2.65203300 | 0.17904800  |
| F  | 6.90175600  | -3.72406500 | -0.54290300 |
| F  | 7.22949200  | -1.59661000 | -0.27092200 |
| F  | 6.93755900  | -2.88130300 | 1.44191300  |



4-<sup>3</sup>MC

|    |             |             |             |
|----|-------------|-------------|-------------|
| Pt | -2.12227800 | -1.29899000 | -0.57777200 |
| S  | 0.64858200  | 2.21279400  | 0.06256500  |
| S  | 1.91349100  | -1.72092000 | -0.46324000 |
| S  | 5.92135200  | 3.09865900  | 1.18060200  |
| S  | 7.09734400  | -1.98524100 | -0.74325800 |
| C  | -3.88367400 | -1.98580800 | 3.46140900  |
| O  | -3.84742900 | -2.44914300 | -1.02509100 |
| O  | -2.59277500 | -1.59502900 | 1.55956600  |
| N  | -3.06197800 | 0.72580700  | -0.32004500 |
| C  | -4.36018500 | 0.99819400  | -0.28299900 |
| H  | -5.03236800 | 0.15989300  | -0.43528300 |
| C  | -4.82817200 | 2.28340400  | -0.05160900 |
| C  | -3.89258700 | 3.30694200  | 0.13923900  |
| H  | -4.22865000 | 4.32383800  | 0.32025000  |
| C  | -2.54379300 | 3.01542300  | 0.10252600  |
| H  | -1.80437800 | 3.79492700  | 0.25547100  |
| C  | -2.12971700 | 1.69111400  | -0.12500800 |
| C  | -0.77686600 | 1.21237300  | -0.16360600 |
| C  | -0.51162000 | -0.13956500 | -0.35842300 |
| C  | 0.88791700  | -0.33533300 | -0.32437600 |
| C  | 1.64909600  | 0.81205500  | -0.11536500 |
| C  | 3.05486600  | 0.59901900  | -0.03953000 |
| C  | 3.34697400  | -0.74297000 | -0.22953700 |
| C  | 5.28285600  | 5.14141100  | -0.65729700 |
| H  | 5.19258600  | 5.91817900  | 0.11116000  |
| H  | 4.57684500  | 5.37716900  | -1.45920200 |
| H  | 6.29641800  | 5.20348000  | -1.07062300 |
| C  | 4.98643100  | 3.78365100  | -0.11200800 |
| C  | 4.01612500  | 2.90697400  | -0.49808600 |
| H  | 3.31901200  | 3.11715900  | -1.30395000 |
| C  | 4.01914000  | 1.67230700  | 0.23265300  |
| C  | 4.99723600  | 1.63176600  | 1.19854800  |
| C  | 5.30962600  | 0.55021200  | 2.17755700  |
| H  | 5.59101500  | 0.96088100  | 3.15290400  |
| H  | 6.12920300  | -0.08959400 | 1.82754600  |
| H  | 4.43259700  | -0.08940900 | 2.31250900  |
| C  | 5.82791600  | 0.21636200  | -1.92135700 |
| H  | 6.44938300  | -0.01252200 | -2.79337900 |
| H  | 6.25379900  | 1.09387700  | -1.41931600 |
| H  | 4.83004900  | 0.49543400  | -2.27182700 |
| C  | 5.73068500  | -0.95262200 | -0.99996600 |
| C  | 4.65187300  | -1.39793700 | -0.26755200 |
| C  | 4.94444200  | -2.59147300 | 0.47440700  |
| H  | 4.21740600  | -3.08250900 | 1.11422700  |
| C  | 6.22503600  | -3.03438000 | 0.33102500  |
| C  | 6.87592900  | -4.21924700 | 0.96399300  |
| H  | 7.73202200  | -3.93083900 | 1.58514000  |
| H  | 7.23750700  | -4.93383000 | 0.21529700  |
| H  | 6.15447000  | -4.73665400 | 1.60327600  |
| C  | -5.92547300 | -3.50424000 | -0.82413200 |
| C  | -4.75261900 | -2.79238800 | -0.20013400 |
| C  | -4.75035300 | -2.58227100 | 1.18717300  |
| H  | -5.62528700 | -2.92262000 | 1.72868600  |
| C  | -3.70898600 | -2.04567900 | 1.96294600  |
| H  | -5.58011100 | -4.45165100 | -1.25322500 |
| H  | -6.31832700 | -2.90218600 | -1.65011300 |
| H  | -6.72596900 | -3.70959100 | -0.11010400 |
| H  | -4.84736400 | -2.38126600 | 3.78994000  |
| H  | -3.07850200 | -2.55348100 | 3.93959900  |
| H  | -3.78578200 | -0.94629400 | 3.79200800  |
| C  | -6.29131800 | 2.58392600  | -0.00958400 |
| F  | -6.64765700 | 3.43409600  | -0.98852000 |
| F  | -7.03597800 | 1.47675000  | -0.14450900 |
| F  | -6.63740800 | 3.16910900  | 1.15053600  |

4-<sup>3</sup>MECP<sub>1</sub>

|    |             |             |             |
|----|-------------|-------------|-------------|
| Pt | -2.13276100 | -1.24866400 | -0.53792200 |
| S  | 0.64810200  | 2.24441000  | 0.12121400  |
| S  | 1.89519100  | -1.68839600 | -0.43919000 |
| S  | 5.83371700  | 3.18329700  | 1.27144500  |
| S  | 7.02009500  | -2.05296400 | -0.91940400 |
| C  | -3.62256000 | -2.49978500 | 3.46439400  |
| O  | -3.82096200 | -2.41272000 | -1.03897800 |
| O  | -2.48199100 | -1.77958800 | 1.56529400  |
| N  | -3.06412300 | 0.77406700  | -0.28111500 |
| C  | -4.36045500 | 1.05999800  | -0.28257600 |
| H  | -5.03526800 | 0.22924400  | -0.46357400 |
| C  | -4.82497400 | 2.34910800  | -0.06584200 |
| C  | -3.88533600 | 3.36141400  | 0.16451900  |
| H  | -4.21923700 | 4.37940200  | 0.34308100  |
| C  | -2.53966400 | 3.05839500  | 0.16639500  |
| H  | -1.79628000 | 3.82833000  | 0.34696600  |
| C  | -2.12908200 | 1.73276800  | -0.06433000 |
| C  | -0.78115300 | 1.25090000  | -0.09611400 |
| C  | -0.52436700 | -0.09998700 | -0.30209900 |
| C  | 0.87391000  | -0.30304600 | -0.28334300 |
| C  | 1.64103800  | 0.84118200  | -0.07809900 |
| C  | 3.04771800  | 0.62631000  | -0.02101600 |
| C  | 3.33285100  | -0.71665900 | -0.21682800 |
| C  | 5.20101900  | 5.21663500  | -0.57775200 |
| H  | 5.06273100  | 5.98508500  | 0.19216900  |
| H  | 4.51345900  | 5.43967300  | -1.39939400 |
| H  | 6.22409000  | 5.31452500  | -0.95971000 |
| C  | 4.92805500  | 3.84604800  | -0.05131900 |
| C  | 3.99984500  | 2.94204900  | -0.47582500 |
| H  | 3.32640000  | 3.13440200  | -1.30631800 |
| C  | 4.00728700  | 1.70652200  | 0.25323700  |
| C  | 4.95300800  | 1.69066600  | 1.25188400  |
| C  | 5.24581900  | 0.62282100  | 2.25245100  |
| H  | 5.48607200  | 1.04765100  | 3.23284900  |
| H  | 6.08535200  | -0.01165400 | 1.94255300  |
| H  | 4.37148300  | -0.02502600 | 2.36462300  |
| C  | 5.74757600  | 0.17817200  | -2.03077100 |
| H  | 6.33791400  | -0.07252000 | -2.91829300 |
| H  | 6.19329400  | 1.06536600  | -1.56460300 |
| H  | 4.73946400  | 0.45232000  | -2.35589400 |
| C  | 5.67708700  | -0.97474000 | -1.08685800 |
| C  | 4.62909100  | -1.38838700 | -0.29360300 |
| C  | 4.92734700  | -2.59526900 | 0.42410500  |
| H  | 4.22351500  | -3.06793500 | 1.10304800  |
| C  | 6.18100600  | -3.08007100 | 0.19878100  |
| C  | 6.83483600  | -4.28894700 | 0.78103900  |
| H  | 7.72468000  | -4.02922100 | 1.36664600  |
| H  | 7.14743400  | -4.99723500 | 0.00456300  |
| H  | 6.13456800  | -4.80519900 | 1.44442800  |
| C  | -5.78616000 | -3.67087900 | -0.87318200 |
| C  | -4.64272400 | -2.93395800 | -0.22150000 |
| C  | -4.57340200 | -2.89678200 | 1.17931600  |
| H  | -5.38558500 | -3.37148400 | 1.71743700  |
| C  | -3.53377900 | -2.36805600 | 1.96204800  |
| H  | -5.39729700 | -4.57179100 | -1.36187700 |
| H  | -6.22537000 | -3.04626400 | -1.65738300 |
| H  | -6.56064500 | -3.96366100 | -0.16072300 |
| H  | -4.54479600 | -2.98491100 | 3.79172600  |
| H  | -2.76380600 | -3.07541300 | 3.82568500  |
| H  | -3.55494900 | -1.50445600 | 3.91566500  |
| C  | -6.28465500 | 2.66870400  | -0.08022300 |
| F  | -6.57973100 | 3.56589800  | -1.03634100 |
| F  | -7.03420400 | 1.57922000  | -0.30008200 |
| F  | -6.68030400 | 3.20757500  | 1.08588200  |

| 4-TS <sub>1</sub> |             |             |             |
|-------------------|-------------|-------------|-------------|
| Pt                | -2.28129300 | -1.12349900 | -0.30535100 |
| S                 | 0.49931000  | 2.42079700  | 0.17627100  |
| S                 | 1.71279700  | -1.53068000 | -0.33479600 |
| S                 | 5.84341300  | 3.28555200  | 0.98945600  |
| S                 | 6.87835800  | -1.85548700 | -0.81847100 |
| C                 | -1.34648000 | -5.21186600 | 1.27627400  |
| O                 | -4.09451300 | -2.19790600 | -0.61586500 |
| O                 | -1.49752400 | -2.99039400 | 0.56534400  |
| N                 | -3.24487700 | 0.97113400  | 0.17344300  |
| C                 | -4.53373300 | 1.28585400  | 0.18568000  |
| H                 | -5.22962300 | 0.45240700  | 0.20349700  |
| C                 | -4.96690600 | 2.60602200  | 0.17967600  |
| C                 | -4.00434900 | 3.61919700  | 0.14895500  |
| H                 | -4.31137500 | 4.66084500  | 0.13516400  |
| C                 | -2.66291300 | 3.28552500  | 0.11413800  |
| H                 | -1.90220800 | 4.05785400  | 0.06033100  |
| C                 | -2.29029200 | 1.93230500  | 0.12140300  |
| C                 | -0.94192600 | 1.42604100  | 0.04222700  |
| C                 | -0.69003400 | 0.07372800  | -0.15910900 |
| C                 | 0.70891700  | -0.13179600 | -0.18513900 |
| C                 | 1.48624400  | 1.01189300  | -0.03247500 |
| C                 | 2.89228400  | 0.78777300  | -0.01483200 |
| C                 | 3.16268400  | -0.56148400 | -0.18762800 |
| C                 | 5.14261200  | 5.27756500  | -0.88108400 |
| H                 | 5.10150300  | 6.08014800  | -0.13530100 |
| H                 | 4.40107900  | 5.49826500  | -1.65471500 |
| H                 | 6.13519400  | 5.31038900  | -1.34556400 |
| C                 | 4.85489700  | 3.94279800  | -0.27750700 |
| C                 | 3.85535100  | 3.06858100  | -0.58689700 |
| H                 | 3.12211500  | 3.26296600  | -1.36417100 |
| C                 | 3.87873100  | 1.85732800  | 0.18177100  |
| C                 | 4.90249500  | 1.83333300  | 1.09942500  |
| C                 | 5.25073000  | 0.77831800  | 2.09534400  |
| H                 | 5.58631200  | 1.21511400  | 3.04181900  |
| H                 | 6.04380400  | 0.11702300  | 1.72477300  |
| H                 | 4.37437900  | 0.15469500  | 2.29497600  |
| C                 | 5.57619600  | 0.31909100  | -2.01340200 |
| H                 | 6.16046500  | 0.05902700  | -2.90224100 |
| H                 | 6.02662200  | 1.20891000  | -1.55641500 |
| H                 | 4.56633100  | 0.59372700  | -2.33179700 |
| C                 | 5.50957300  | -0.81974900 | -1.05236900 |
| C                 | 4.45952500  | -1.23032100 | -0.26084100 |
| C                 | 4.77393800  | -2.40111500 | 0.50786000  |
| H                 | 4.07063500  | -2.86346100 | 1.19396700  |
| C                 | 6.04396100  | -2.86025400 | 0.32614700  |
| C                 | 6.71184500  | -4.02854700 | 0.97222600  |
| H                 | 7.59315100  | -3.72617900 | 1.54997100  |
| H                 | 7.03974500  | -4.77024600 | 0.23445500  |
| H                 | 6.01264600  | -4.51914800 | 1.65589300  |
| C                 | -5.76045700 | -3.84091800 | -0.61190200 |
| C                 | -4.36071800 | -3.39241800 | -0.27842100 |
| C                 | -3.48679800 | -4.30512900 | 0.33799600  |
| H                 | -3.88101500 | -5.29429500 | 0.54076900  |
| C                 | -2.15002700 | -4.07922700 | 0.68815800  |
| H                 | -5.90077000 | -3.80145400 | -1.69791700 |
| H                 | -6.47772000 | -3.14177600 | -0.16903700 |
| H                 | -5.97753200 | -4.85186000 | -0.26041700 |
| H                 | -1.91035200 | -6.14581800 | 1.33263700  |
| H                 | -0.44882500 | -5.36645700 | 0.66826100  |
| H                 | -1.01072100 | -4.93003000 | 2.28019500  |
| C                 | -6.42104900 | 2.94651800  | 0.24880000  |
| F                 | -6.74321400 | 3.89320400  | -0.64919900 |
| F                 | -7.19716700 | 1.87823500  | 0.01462000  |
| F                 | -6.75966300 | 3.43118000  | 1.45703500  |

| 4-TS <sub>2</sub> |             |             |             |
|-------------------|-------------|-------------|-------------|
| Pt                | -2.38882800 | -0.95436800 | -0.05632200 |
| S                 | 0.49147400  | 2.46214900  | 0.02380000  |
| S                 | 1.59047200  | -1.59994600 | -0.10416600 |
| S                 | 6.22489600  | 2.71157000  | 0.63105700  |
| S                 | 6.98171900  | -1.35124800 | -0.26088800 |
| C                 | -0.99223700 | -4.99695200 | -0.24550600 |
| O                 | -4.25068000 | -1.92027200 | -0.05050300 |
| O                 | -1.40601800 | -2.70945900 | -0.14819200 |
| N                 | -3.20933200 | 0.88616900  | 0.02879900  |
| C                 | -4.52417100 | 1.11615100  | 0.06582100  |
| H                 | -5.15578300 | 0.23456200  | 0.04585700  |
| C                 | -5.03968500 | 2.39923100  | 0.12336000  |
| C                 | -4.15252200 | 3.48672800  | 0.14525400  |
| H                 | -4.53606000 | 4.50176600  | 0.18808000  |
| C                 | -2.79592500 | 3.25362300  | 0.10745500  |
| H                 | -2.08779800 | 4.07566000  | 0.12187500  |
| C                 | -2.31562500 | 1.93322500  | 0.04742300  |
| C                 | -0.96830400 | 1.49370200  | 0.00310100  |
| C                 | -0.74416900 | 0.11131300  | -0.05364300 |
| C                 | 0.63255300  | -0.14103800 | -0.09215500 |
| C                 | 1.44186400  | 1.00879500  | -0.06706800 |
| C                 | 2.82183800  | 0.76112900  | -0.01652600 |
| C                 | 3.07981500  | -0.64982500 | -0.10902100 |
| C                 | 5.55605700  | 4.91060600  | -1.00270600 |
| H                 | 5.86866300  | 5.64965600  | -0.25518400 |
| H                 | 4.72843300  | 5.33722200  | -1.57682600 |
| H                 | 6.40167200  | 4.75817500  | -1.68465600 |
| C                 | 5.12775300  | 3.63214800  | -0.36899300 |
| C                 | 3.93455900  | 2.98110300  | -0.49952300 |
| H                 | 3.13153400  | 3.35667500  | -1.12704900 |
| C                 | 3.88021800  | 1.71783500  | 0.15773600  |
| C                 | 5.08270500  | 1.40627200  | 0.84526500  |
| C                 | 5.22195900  | 0.57722600  | 2.08685000  |
| H                 | 5.07940000  | 1.20618900  | 2.97392600  |
| H                 | 6.21223800  | 0.11358600  | 2.15238800  |
| H                 | 4.46956200  | -0.21280300 | 2.10947800  |
| C                 | 5.54284600  | 0.33057200  | -1.92970500 |
| H                 | 5.77481400  | -0.32775700 | -2.77755900 |
| H                 | 6.30079500  | 1.12267600  | -1.90089200 |
| H                 | 4.57126700  | 0.79117200  | -2.11862300 |
| C                 | 5.51717300  | -0.45043900 | -0.65140600 |
| C                 | 4.35379300  | -1.21838000 | -0.20755800 |
| C                 | 4.72148400  | -2.51809000 | 0.25667400  |
| H                 | 4.00052500  | -3.23934800 | 0.63073500  |
| C                 | 6.06459600  | -2.73222100 | 0.32867800  |
| C                 | 6.77198100  | -3.92104400 | 0.87698800  |
| H                 | 7.40234700  | -3.64833600 | 1.73257200  |
| H                 | 7.42685500  | -4.37925500 | 0.12560200  |
| H                 | 6.04971800  | -4.67316100 | 1.20699200  |
| C                 | -5.81111500 | -3.66492400 | -0.07520600 |
| C                 | -4.38526300 | -3.18444300 | -0.09337800 |
| C                 | -3.34345600 | -4.12535900 | -0.15292800 |
| H                 | -3.63239800 | -5.16944600 | -0.18457600 |
| C                 | -1.97123700 | -3.85798100 | -0.17709900 |
| H                 | -6.35028900 | -3.22528100 | -0.92141100 |
| H                 | -6.29930800 | -3.30839600 | 0.83852400  |
| H                 | -5.89226400 | -4.75286600 | -0.12371400 |
| H                 | -1.48264900 | -5.97221200 | -0.26622000 |
| H                 | -0.37188300 | -4.88445900 | -1.14129600 |
| H                 | -0.32131000 | -4.94700200 | 0.61896200  |
| C                 | -6.51253100 | 2.63417200  | 0.18386000  |
| F                 | -6.90865500 | 3.50371700  | -0.76348600 |
| F                 | -7.21338200 | 1.50309200  | 0.01679400  |
| F                 | -6.88099200 | 3.16532200  | 1.36458100  |

**4-<sup>3</sup>MECP<sub>2</sub>**

|    |             |             |             |
|----|-------------|-------------|-------------|
| Pt | 2.43005900  | 0.94300500  | -0.05469600 |
| S  | -0.46525600 | -2.45836000 | 0.06640100  |
| S  | -1.56390800 | 1.57992800  | -0.11085400 |
| S  | -6.48601200 | -2.40365600 | 0.14143700  |
| S  | -7.01191800 | 1.15870700  | 0.08774900  |
| C  | 1.02240800  | 4.98031000  | -0.22567400 |
| O  | 4.27834000  | 1.91682000  | -0.07022400 |
| O  | 1.46130300  | 2.69598700  | -0.13479200 |
| N  | 3.24445400  | -0.89658600 | 0.02618400  |
| C  | 4.55766100  | -1.13006400 | 0.05084600  |
| H  | 5.19552200  | -0.24334100 | 0.01945900  |
| C  | 5.07502600  | -2.41699500 | 0.10571700  |
| C  | 4.18251100  | -3.50075000 | 0.12693200  |
| H  | 4.56462300  | -4.52379900 | 0.15474300  |
| C  | 2.82417400  | -3.26155800 | 0.10060600  |
| H  | 2.10755300  | -4.08407700 | 0.10905400  |
| C  | 2.34750600  | -1.93753200 | 0.05430700  |
| C  | 0.99816300  | -1.49454400 | 0.02557800  |
| C  | 0.78367500  | -0.11336700 | -0.03342500 |
| C  | -0.59915100 | 0.14237200  | -0.05670800 |
| C  | -1.41203000 | -1.00778100 | -0.01214300 |
| C  | -2.79543800 | -0.74365400 | -0.01418300 |
| C  | -3.02710300 | 0.64082700  | -0.07251500 |
| C  | -5.64204000 | -4.93687900 | -0.73959000 |
| H  | -6.10454200 | -5.47316700 | 0.10727400  |
| H  | -4.75339700 | -5.50264600 | -1.05404500 |
| H  | -6.37215000 | -4.95677700 | -1.56712600 |
| C  | -5.26296900 | -3.54924600 | -0.36879600 |
| C  | -3.98864900 | -2.97836100 | -0.36305300 |
| H  | -3.11171100 | -3.53993400 | -0.69684100 |
| C  | -3.92833100 | -1.65779600 | 0.04421500  |
| C  | -5.25309600 | -1.07203800 | 0.48398200  |
| C  | -5.27946600 | -0.77420700 | 1.98441100  |
| H  | -6.27202600 | -0.41001000 | 2.28815600  |
| H  | -4.53318700 | -0.00430700 | 2.23343900  |
| H  | -5.04591600 | -1.68677000 | 2.55001200  |
| C  | -5.56265100 | -0.08069300 | -1.86781800 |
| H  | -6.42897700 | -0.72464600 | -2.07858900 |
| H  | -4.64916500 | -0.59989500 | -2.19512700 |
| H  | -5.66225000 | 0.85256900  | -2.43937500 |
| C  | -5.48232100 | 0.22608000  | -0.37089000 |
| C  | -4.34740300 | 1.18516200  | -0.07413400 |
| C  | -4.76453600 | 2.48059300  | 0.23498400  |
| H  | -4.06780000 | 3.30153400  | 0.42163500  |
| C  | -6.13574500 | 2.64562600  | 0.35452000  |
| C  | -6.87246300 | 3.89271100  | 0.68860300  |
| H  | -7.48118600 | 3.77277500  | 1.60097300  |
| H  | -7.56450700 | 4.17857300  | -0.12175500 |
| H  | -6.17079700 | 4.72333500  | 0.84860600  |
| C  | 5.85108500  | 3.65034300  | -0.11917100 |
| C  | 4.42496800  | 3.17405400  | -0.11643700 |
| C  | 3.38246400  | 4.11991200  | -0.16376500 |
| H  | 3.67131500  | 5.16984200  | -0.19997300 |
| C  | 2.00698700  | 3.84681600  | -0.17052800 |
| H  | 6.37695900  | 3.20926500  | -0.98004000 |
| H  | 6.35696400  | 3.28141100  | 0.78649700  |
| H  | 5.93518900  | 4.74299400  | -0.16274900 |
| H  | 1.50842600  | 5.96299000  | -0.25125600 |
| H  | 0.38681900  | 4.86253700  | -1.11689600 |
| H  | 0.35664100  | 4.92308800  | 0.64932600  |
| C  | 6.55418900  | -2.64312000 | 0.18562700  |
| F  | 6.92360900  | -3.70271900 | -0.54280900 |
| F  | 7.24340700  | -1.58655000 | -0.25051900 |
| F  | 6.95227900  | -2.88356900 | 1.44144000  |

**5-1GSo**

|    |             |             |             |
|----|-------------|-------------|-------------|
| Pt | -2.29287400 | -0.98550300 | -0.06172300 |
| S  | 0.51297100  | 2.49411200  | 0.10587500  |
| S  | 1.71437000  | -1.55569000 | -0.09850600 |
| C  | -0.85831700 | -5.01680200 | -0.31456100 |
| O  | -4.14780100 | -1.96825300 | -0.10310000 |
| O  | -1.28790700 | -2.73459500 | -0.17546300 |
| N  | -3.14205100 | 0.83061300  | 0.04813400  |
| C  | -4.45576100 | 1.04680200  | 0.07795100  |
| H  | -5.07956700 | 0.16030500  | 0.03417400  |
| C  | -4.99114300 | 2.32331800  | 0.15928000  |
| C  | -4.12175000 | 3.44104100  | 0.21522000  |
| H  | -4.52844600 | 4.44509600  | 0.27911800  |
| C  | -2.76856000 | 3.23048600  | 0.18466700  |
| H  | -2.07289000 | 4.06301700  | 0.22477100  |
| C  | -2.25729900 | 1.91318600  | 0.09836700  |
| C  | -0.92068700 | 1.50621600  | 0.05505100  |
| C  | -0.65948300 | 0.06778400  | -0.02897700 |
| C  | 0.70089000  | -0.13860400 | -0.05627800 |
| C  | 1.50478000  | 1.02808600  | -0.00281100 |
| C  | 2.87821300  | 0.81471000  | 0.02992900  |
| C  | 5.83176600  | 5.23004800  | -0.61652000 |
| C  | 5.26710300  | 3.92751300  | -0.15456100 |
| C  | 3.88550200  | 1.86209800  | 0.17283200  |
| C  | 4.93631700  | 1.93865300  | 1.05929600  |
| C  | 5.24122000  | 0.94300800  | 2.13520400  |
| H  | 5.54349000  | 1.45543700  | 3.05507300  |
| H  | 6.06107800  | 0.27671900  | 1.83935700  |
| H  | 4.37506800  | 0.31502500  | 2.35854500  |
| C  | -5.68815700 | -3.72773700 | -0.18638400 |
| C  | -4.26729100 | -3.23277800 | -0.17223800 |
| C  | -3.21587400 | -4.16281600 | -0.23431700 |
| H  | -3.49555600 | -5.20835700 | -0.29024300 |
| C  | -1.84498500 | -3.88503200 | -0.23503600 |
| H  | -6.21410600 | -3.28697700 | -1.04038700 |
| H  | -6.19836200 | -3.38220700 | 0.71942700  |
| H  | -5.75762700 | -4.81597500 | -0.24477700 |
| H  | -1.34217700 | -5.99467900 | -0.35531200 |
| H  | -0.23216700 | -4.88565100 | -1.20374800 |
| H  | -0.19388400 | -4.97701800 | 0.55536600  |
| C  | -6.46567200 | 2.53290900  | 0.20203400  |
| F  | -6.87324000 | 3.36041900  | -0.77942900 |
| F  | -7.14899300 | 1.38560400  | 0.07399400  |
| F  | -6.85086500 | 3.10441300  | 1.35970100  |
| C  | 5.71371600  | 3.11851700  | 0.85324700  |
| S  | 3.85795200  | 3.24367000  | -0.88965400 |
| H  | 6.58210200  | 3.36585200  | 1.45729500  |
| S  | 6.88962200  | -1.91050900 | -0.52181000 |
| C  | 5.67023000  | 0.23475800  | -1.83191100 |
| H  | 6.27926300  | -0.07913700 | -2.68628500 |
| H  | 6.12566800  | 1.13602100  | -1.40264400 |
| H  | 4.67972600  | 0.51232500  | -2.20229800 |
| C  | 5.54870100  | -0.85885200 | -0.82528500 |
| C  | 4.72389900  | -2.41403200 | 0.72207800  |
| H  | 3.98998300  | -2.85582000 | 1.38929700  |
| C  | 5.99295300  | -2.88954600 | 0.60074800  |
| C  | 6.62201300  | -4.05085000 | 1.29558100  |
| C  | 4.45523500  | -1.24121900 | -0.06718200 |
| C  | 3.16907100  | -0.57591800 | -0.04371100 |
| H  | 5.88991300  | -4.52508700 | 1.95581600  |
| H  | 6.97677700  | -4.80649600 | 0.58493200  |
| H  | 7.47943500  | -3.74391300 | 1.90589700  |
| H  | 5.11638400  | 6.05066100  | -0.48784600 |
| H  | 6.11144300  | 5.20040400  | -1.67597700 |
| H  | 6.72813600  | 5.46927700  | -0.03675500 |

**5-1GSc**

|    |             |             |             |
|----|-------------|-------------|-------------|
| Pt | 2.39017600  | 0.95962100  | -0.03553200 |
| S  | -0.48970400 | -2.45644200 | 0.12377600  |
| S  | -1.59194700 | 1.58899800  | -0.02683100 |
| C  | 0.98469100  | 4.99900700  | -0.24013400 |
| O  | 4.24962600  | 1.92589200  | -0.10550300 |
| O  | 1.40251000  | 2.71285200  | -0.12159300 |
| N  | 3.21341100  | -0.88012300 | 0.04904900  |
| C  | 4.52928100  | -1.10863500 | 0.05853000  |
| H  | 5.15937400  | -0.22672000 | 0.01742600  |
| C  | 5.04659900  | -2.39081500 | 0.11321400  |
| C  | 4.16083200  | -3.47757200 | 0.16058300  |
| H  | 4.54537800  | -4.49237700 | 0.20052800  |
| C  | 2.80306600  | -3.24535900 | 0.15142800  |
| H  | 2.09591300  | -4.06756900 | 0.18570100  |
| C  | 2.32136700  | -1.92608900 | 0.09486300  |
| C  | 0.97160400  | -1.48682700 | 0.07823200  |
| C  | 0.74928700  | -0.10871900 | 0.02095700  |
| C  | -0.63195700 | 0.14281100  | 0.00616500  |
| C  | -1.43999100 | -1.00488400 | 0.04905900  |
| C  | -2.82637300 | -0.74587600 | 0.05849400  |
| C  | -6.44539300 | -4.60012600 | -0.65517400 |
| C  | -5.74653800 | -3.33422400 | -0.29115300 |
| C  | -3.94522400 | -1.63273400 | 0.15576500  |
| C  | -5.31435000 | -1.09093800 | 0.50071200  |
| C  | -5.39784300 | -0.78339000 | 2.00774500  |
| H  | -6.40005700 | -0.43274400 | 2.27490500  |
| H  | -4.67241200 | -0.01136200 | 2.28349700  |
| H  | -5.17664600 | -1.68960800 | 2.57910400  |
| C  | 5.80697400  | 3.67033500  | -0.21071900 |
| C  | 4.38184500  | 3.18933900  | -0.17105500 |
| C  | 3.33781100  | 4.12905700  | -0.20896200 |
| H  | 3.62480400  | 5.17264000  | -0.26479600 |
| C  | 1.96586100  | 3.86112800  | -0.18544900 |
| H  | 6.31022500  | 3.23367200  | -1.08039900 |
| H  | 6.33324200  | 3.31099900  | 0.68035100  |
| H  | 5.88564700  | 4.75841600  | -0.25994000 |
| H  | 1.47391300  | 5.97402900  | -0.28526400 |
| H  | 0.34088900  | 4.87672700  | -1.11798900 |
| H  | 0.33733200  | 4.95909200  | 0.64261600  |
| C  | 6.52089900  | -2.62454000 | 0.14245600  |
| F  | 6.89662800  | -3.49852100 | -0.80880800 |
| F  | 7.21660200  | -1.49363600 | -0.04604200 |
| F  | 6.91555800  | -3.14883900 | 1.31757500  |
| C  | -6.27633400 | -2.18343700 | 0.14216700  |
| S  | -3.97673400 | -3.27435900 | -0.40703400 |
| H  | -7.34597600 | -2.05544100 | 0.28970400  |
| S  | -7.04028100 | 1.15926200  | 0.02613400  |
| C  | -5.50472800 | -0.10462200 | -1.85563500 |
| H  | -6.35075900 | -0.75210800 | -2.10569100 |
| H  | -4.57848100 | -0.61926500 | -2.13244300 |
| H  | -5.57925500 | 0.81716000  | -2.43907800 |
| C  | -5.49253100 | 0.21926600  | -0.35619000 |
| C  | -4.79970300 | 2.48255400  | 0.25301700  |
| H  | -4.11775800 | 3.30337800  | 0.45894700  |
| C  | -6.16791000 | 2.64449400  | 0.32996400  |
| C  | -6.91009400 | 3.89037700  | 0.66208800  |
| C  | -4.37092800 | 1.18376700  | -0.03020000 |
| C  | -3.06059100 | 0.64784300  | 0.00189900  |
| H  | -6.21100200 | 4.70796600  | 0.86063400  |
| H  | -7.57083200 | 4.19594400  | -0.15937300 |
| H  | -7.54146900 | 3.75459700  | 1.54961300  |
| H  | -6.11805800 | -5.43093100 | -0.01908500 |
| H  | -6.24080600 | -4.88274500 | -1.69452100 |
| H  | -7.52608900 | -4.48076900 | -0.53677900 |

**5-<sup>3</sup>ESo**

|    |             |             |             |
|----|-------------|-------------|-------------|
| Pt | -2.29287400 | -0.98550300 | -0.06172300 |
| S  | 0.51297100  | 2.49411200  | 0.10587500  |
| S  | 1.71437000  | -1.55569000 | -0.09850600 |
| C  | -0.85831700 | -5.01680200 | -0.31456100 |
| O  | -4.14780100 | -1.96825300 | -0.10310000 |
| O  | -1.28790700 | -2.73459500 | -0.17546300 |
| N  | -3.14205100 | 0.83061300  | 0.04813400  |
| C  | -4.45576100 | 1.04680200  | 0.07795100  |
| H  | -5.07956700 | 0.16030500  | 0.03417400  |
| C  | -4.99114300 | 2.32331800  | 0.15928000  |
| C  | -4.12175000 | 3.44104100  | 0.21522000  |
| H  | -4.52844600 | 4.44509600  | 0.27911800  |
| C  | -2.76856000 | 3.23048600  | 0.18466700  |
| H  | -2.07289000 | 4.06301700  | 0.22477100  |
| C  | -2.25729900 | 1.91318600  | 0.09836700  |
| C  | -0.92068700 | 1.50621600  | 0.05505100  |
| C  | -0.65948300 | 0.06778400  | -0.02897700 |
| C  | 0.70089000  | -0.13860400 | -0.05627800 |
| C  | 1.50478000  | 1.02808600  | -0.00281100 |
| C  | 2.87821300  | 0.81471000  | 0.02992900  |
| C  | 5.83176600  | 5.23004800  | -0.61652000 |
| C  | 5.26710300  | 3.92751300  | -0.15456100 |
| C  | 3.88550200  | 1.86209800  | 0.17283200  |
| C  | 4.93631700  | 1.93865300  | 1.05929600  |
| C  | 5.24122000  | 0.94300800  | 2.13520400  |
| H  | 5.54349000  | 1.45543700  | 3.05507300  |
| H  | 6.06107800  | 0.27671900  | 1.83935700  |
| H  | 4.37506800  | 0.31502500  | 2.35854500  |
| C  | -5.68815700 | -3.72773700 | -0.18638400 |
| C  | -4.26729100 | -3.23277800 | -0.17223800 |
| C  | -3.21587400 | -4.16281600 | -0.23431700 |
| H  | -3.49555600 | -5.20835700 | -0.29024300 |
| C  | -1.84498500 | -3.88503200 | -0.23503600 |
| H  | -6.21410600 | -3.28697700 | -1.04038700 |
| H  | -6.19836200 | -3.38220700 | 0.71942700  |
| H  | -5.75762700 | -4.81597500 | -0.24477700 |
| H  | -1.34217700 | -5.99467900 | -0.35531200 |
| H  | -0.23216700 | -4.88565100 | -1.20374800 |
| H  | -0.19388400 | -4.97701800 | 0.55536600  |
| C  | -6.46567200 | 2.53290900  | 0.20203400  |
| F  | -6.87324000 | 3.36041900  | -0.77942900 |
| F  | -7.14899300 | 1.38560400  | 0.07399400  |
| F  | -6.85086500 | 3.10441300  | 1.35970100  |
| C  | 5.71371600  | 3.11851700  | 0.85324700  |
| S  | 3.85795200  | 3.24367000  | -0.88965400 |
| H  | 6.58210200  | 3.36585200  | 1.45729500  |
| S  | 6.88962200  | -1.91050900 | -0.52181000 |
| C  | 5.67023000  | 0.23475800  | -1.83191100 |
| H  | 6.27926300  | -0.07913700 | -2.68628500 |
| H  | 6.12566800  | 1.13602100  | -1.40264400 |
| H  | 4.67972600  | 0.51232500  | -2.20229800 |
| C  | 5.54870100  | -0.85885200 | -0.82528500 |
| C  | 4.72389900  | -2.41403200 | 0.72207800  |
| H  | 3.98998300  | -2.85582000 | 1.38929700  |
| C  | 5.99295300  | -2.88954600 | 0.60074800  |
| C  | 6.62201300  | -4.05085000 | 1.29558100  |
| C  | 4.45523500  | -1.24121900 | -0.06718200 |
| C  | 3.16907100  | -0.57591800 | -0.04371100 |
| H  | 5.88991300  | -4.52508700 | 1.95581600  |
| H  | 6.97677700  | -4.80649600 | 0.58493200  |
| H  | 7.47943500  | -3.74391300 | 1.90589700  |
| H  | 5.11638400  | 6.05066100  | -0.48784600 |
| H  | 6.11144300  | 5.20040400  | -1.67597700 |

H 6.72813600 5.46927700 -0.03675500

**5-<sup>3</sup>ESc**

|    |             |             |             |
|----|-------------|-------------|-------------|
| Pt | 2.39017600  | 0.95962100  | -0.03553200 |
| S  | -0.48970400 | -2.45644200 | 0.12377600  |
| S  | -1.59194700 | 1.58899800  | -0.02683100 |
| C  | 0.98469100  | 4.99900700  | -0.24013400 |
| O  | 4.24962600  | 1.92589200  | -0.10550300 |
| O  | 1.40251000  | 2.71285200  | -0.12159300 |
| N  | 3.21341100  | -0.88012300 | 0.04904900  |
| C  | 4.52928100  | -1.10863500 | 0.05853000  |
| H  | 5.15937400  | -0.22672000 | 0.01742600  |
| C  | 5.04659900  | -2.39081500 | 0.11321400  |
| C  | 4.16083200  | -3.47757200 | 0.16058300  |
| H  | 4.54537800  | -4.49237700 | 0.20052800  |
| C  | 2.80306600  | -3.24535900 | 0.15142800  |
| H  | 2.09591300  | -4.06756900 | 0.18570100  |
| C  | 2.32136700  | -1.92608900 | 0.09486300  |
| C  | 0.97160400  | -1.48682700 | 0.07823200  |
| C  | 0.74928700  | -0.10871900 | 0.02095700  |
| C  | -0.63195700 | 0.14281100  | 0.00616500  |
| C  | -1.43999100 | -1.00488400 | 0.04905900  |
| C  | -2.82637300 | -0.74587600 | 0.05849400  |
| C  | -6.44539300 | -4.60012600 | -0.65517400 |
| C  | -5.74653800 | -3.33422400 | -0.29115300 |
| C  | -3.94522400 | -1.63273400 | 0.15576500  |
| C  | -5.31435000 | -1.09093800 | 0.50071200  |
| C  | -5.39784300 | -0.78339000 | 2.00774500  |
| H  | -6.40005700 | -0.43274400 | 2.27490500  |
| H  | -4.67241200 | -0.01136200 | 2.28349700  |
| H  | -5.17664600 | -1.68960800 | 2.57910400  |
| C  | 5.80697400  | 3.67033500  | -0.21071900 |
| C  | 4.38184500  | 3.18933900  | -0.17105500 |
| C  | 3.33781100  | 4.12905700  | -0.20896200 |
| H  | 3.62480400  | 5.17264000  | -0.26479600 |
| C  | 1.96586100  | 3.86112800  | -0.18544900 |
| H  | 6.31022500  | 3.23367200  | -1.08039900 |
| H  | 6.33324200  | 3.31099900  | 0.68035100  |
| H  | 5.88564700  | 4.75841600  | -0.25994000 |
| H  | 1.47391300  | 5.97402900  | -0.28526400 |
| H  | 0.34088900  | 4.87672700  | -1.11798900 |
| H  | 0.33733200  | 4.95909200  | 0.64261600  |
| C  | 6.52089900  | -2.62454000 | 0.14245600  |
| F  | 6.89662800  | -3.49852100 | -0.80880800 |
| F  | 7.21660200  | -1.49363600 | -0.04604200 |
| F  | 6.91555800  | -3.14883900 | 1.31757500  |
| C  | -6.27633400 | -2.18343700 | 0.14216700  |
| S  | -3.97673400 | -3.27435900 | -0.40703400 |
| H  | -7.34597600 | -2.05544100 | 0.28970400  |
| S  | -7.04028100 | 1.15926200  | 0.02613400  |
| C  | -5.50472800 | -0.10462200 | -1.85563500 |
| H  | -6.35075900 | -0.75210800 | -2.10569100 |
| H  | -4.57848100 | -0.61928500 | -2.13244300 |
| H  | -5.57925500 | 0.81716000  | -2.43907800 |
| C  | -5.49253100 | 0.21926600  | -0.35619000 |
| C  | -4.79970300 | 2.48255400  | 0.25301700  |
| H  | -4.11775800 | 3.30337800  | 0.45894700  |
| C  | -6.16791000 | 2.64449400  | 0.32996400  |
| C  | -6.91009400 | 3.89037700  | 0.66208800  |
| C  | -4.37092800 | 1.18376700  | -0.03020000 |
| C  | -3.06059100 | 0.64784300  | 0.00189900  |
| H  | -6.21100200 | 4.70796600  | 0.86063400  |
| H  | -7.57083200 | 4.19594400  | -0.15937300 |
| H  | -7.54146900 | 3.75459700  | 1.54961300  |
| H  | -6.11805800 | -5.43093100 | -0.01908500 |
| H  | -6.24080600 | -4.88274500 | -1.69452100 |

|                         |             |             |             |
|-------------------------|-------------|-------------|-------------|
| H                       | -7.52608900 | -4.48076900 | -0.53677900 |
| <b>5-<sup>3</sup>MC</b> |             |             |             |
| Pt                      | -2.29287400 | -0.98550300 | -0.06172300 |
| S                       | 0.51297100  | 2.49411200  | 0.10587500  |
| S                       | 1.71437000  | -1.55569000 | -0.09850600 |
| C                       | -3.03299257 | -1.10047241 | 4.15873420  |
| O                       | -4.14780100 | -1.96825300 | -0.10310000 |
| O                       | -2.32320655 | -0.87018960 | 1.95520562  |
| N                       | -3.14205100 | 0.83061300  | 0.04813400  |
| C                       | -4.45576100 | 1.04680200  | 0.07795100  |
| H                       | -5.07956700 | 0.16030500  | 0.03417400  |
| C                       | -4.99114300 | 2.32331800  | 0.15928000  |
| C                       | -4.12175000 | 3.44104100  | 0.21522000  |
| H                       | -4.52844600 | 4.44509600  | 0.27911800  |
| C                       | -2.76856000 | 3.23048600  | 0.18466700  |
| H                       | -2.07289000 | 4.06301700  | 0.22477100  |
| C                       | -2.25729900 | 1.91318600  | 0.09836700  |
| C                       | -0.92068700 | 1.50621600  | 0.05505100  |
| C                       | -0.65948300 | 0.06778400  | -0.02897700 |
| C                       | 0.70089000  | -0.13860400 | -0.05627800 |
| C                       | 1.50478000  | 1.02808600  | -0.00281100 |
| C                       | 2.87821300  | 0.81471000  | 0.02992900  |
| C                       | 5.83176600  | 5.23004800  | -0.61652000 |
| C                       | 5.26710300  | 3.92751300  | -0.15456100 |
| C                       | 3.88550200  | 1.86209800  | 0.17283200  |
| C                       | 4.93631700  | 1.93865300  | 1.05929600  |
| C                       | 5.24122000  | 0.94300800  | 2.13520400  |
| H                       | 5.54349000  | 1.45543700  | 3.05507300  |
| H                       | 6.06107800  | 0.27671900  | 1.83935700  |
| H                       | 4.37506800  | 0.31502500  | 2.35854500  |
| C                       | -6.11953252 | -2.95026942 | 0.68641588  |
| C                       | -4.81469665 | -2.24654400 | 0.94374560  |
| C                       | -4.43951264 | -1.95852200 | 2.26684140  |
| H                       | -5.12811811 | -2.26732807 | 3.04463767  |
| C                       | -3.27013120 | -1.31824332 | 2.69003328  |
| H                       | -5.92458419 | -3.88342001 | 0.14656592  |
| H                       | -6.74260964 | -2.32619032 | 0.03642060  |
| H                       | -6.66874662 | -3.17406179 | 1.60335569  |
| H                       | -3.85010046 | -1.47710411 | 4.77720639  |
| H                       | -2.10075190 | -1.59674426 | 4.44952540  |
| H                       | -2.89958294 | -0.02969014 | 4.34702692  |
| C                       | -6.46567200 | 2.53290900  | 0.20203400  |
| F                       | -6.87324000 | 3.36041900  | -0.77942900 |
| F                       | -7.14899300 | 1.38560400  | 0.07399400  |
| F                       | -6.85086500 | 3.10441300  | 1.35970100  |
| C                       | 5.71371600  | 3.11851700  | 0.85324700  |
| S                       | 3.85795200  | 3.24367000  | -0.88965400 |
| H                       | 6.58210200  | 3.36585200  | 1.45729500  |
| S                       | 6.88962200  | -1.91050900 | -0.52181000 |
| C                       | 5.67023000  | 0.23475800  | -1.83191100 |
| H                       | 6.27926300  | -0.07913700 | -2.68628500 |
| H                       | 6.12566800  | 1.13602100  | -1.40264400 |
| H                       | 4.67972600  | 0.51232500  | -2.20229800 |
| C                       | 5.54870100  | -0.85885200 | -0.82528500 |
| C                       | 4.72389900  | -2.41403200 | 0.72207800  |
| H                       | 3.98998300  | -2.85582000 | 1.38929700  |
| C                       | 5.99295300  | -2.88954600 | 0.60074800  |
| C                       | 6.62201300  | -4.05085000 | 1.29558100  |
| C                       | 4.45523500  | -1.24121900 | -0.06718200 |
| C                       | 3.16907100  | -0.57591800 | -0.04371100 |
| H                       | 5.88991300  | -4.52508700 | 1.95581600  |
| H                       | 6.97677700  | -4.80649600 | 0.58493200  |
| H                       | 7.47943500  | -3.74391300 | 1.90589700  |
| H                       | 5.11638400  | 6.05066100  | -0.48784600 |
| H                       | 6.11144300  | 5.20040400  | -1.67597700 |

|                                       |             |             |             |
|---------------------------------------|-------------|-------------|-------------|
| H                                     | 6.72813600  | 5.46927700  | -0.03675500 |
| <b>5-<sup>3</sup>MECP<sub>1</sub></b> |             |             |             |
| Pt                                    | -2.09209000 | -1.29710600 | -0.58426400 |
| S                                     | 0.65425700  | 2.22361300  | 0.10743300  |
| S                                     | 1.94180300  | -1.69696500 | -0.46048600 |
| C                                     | -3.85996100 | -2.01263700 | 3.44678600  |
| O                                     | -3.81024800 | -2.45390100 | -1.04193300 |
| O                                     | -2.56593900 | -1.60641500 | 1.56032300  |
| N                                     | -3.04426800 | 0.72051900  | -0.31408300 |
| C                                     | -4.34416500 | 0.98548100  | -0.28253100 |
| H                                     | -5.01076700 | 0.14518000  | -0.44762000 |
| C                                     | -4.82047500 | 2.26575300  | -0.04099000 |
| C                                     | -3.89176700 | 3.29231900  | 0.16598700  |
| H                                     | -4.23449700 | 4.30551200  | 0.35501700  |
| C                                     | -2.54113800 | 3.00846100  | 0.13468300  |
| H                                     | -1.80688000 | 3.79047600  | 0.29921900  |
| C                                     | -2.11874200 | 1.68881300  | -0.10356000 |
| C                                     | -0.76274400 | 1.21771200  | -0.13915300 |
| C                                     | -0.48888700 | -0.12956900 | -0.35068000 |
| C                                     | 0.91171900  | -0.31603100 | -0.31335800 |
| C                                     | 1.66543400  | 0.83215500  | -0.08333000 |
| C                                     | 3.07315400  | 0.62025500  | 0.00124000  |
| C                                     | 5.94473500  | 5.14000500  | 0.05846000  |
| C                                     | 5.39187100  | 3.77885200  | 0.32529300  |
| C                                     | 4.04621200  | 1.66141300  | 0.32278200  |
| C                                     | 5.04408600  | 1.65214700  | 1.27053100  |
| C                                     | 5.31157100  | 0.53634100  | 2.23142800  |
| H                                     | 5.58978800  | 0.93326700  | 3.21380800  |
| H                                     | 6.13266700  | -0.10255900 | 1.88303900  |
| H                                     | 4.43289300  | -0.10307000 | 2.35111600  |
| C                                     | -5.88348700 | -3.52019600 | -0.85123800 |
| C                                     | -4.71555000 | -2.80590500 | -0.22082700 |
| C                                     | -4.71753700 | -2.60281100 | 1.16752800  |
| H                                     | -5.59206000 | -2.95024800 | 1.70518800  |
| C                                     | -3.68092600 | -2.06464000 | 1.94854200  |
| H                                     | -5.53232900 | -4.46312900 | -1.28544800 |
| H                                     | -6.27799500 | -2.91524600 | -1.67432400 |
| H                                     | -6.68420500 | -3.73399900 | -0.13995300 |
| H                                     | -4.82197900 | -2.41568900 | 3.77097500  |
| H                                     | -3.05240700 | -2.57718600 | 3.92464200  |
| H                                     | -3.76970200 | -0.97397300 | 3.78219300  |
| C                                     | -6.28551100 | 2.55818600  | -0.00662800 |
| F                                     | -6.64086100 | 3.40910600  | -0.98519600 |
| F                                     | -7.02325300 | 1.44732200  | -0.14906100 |
| F                                     | -6.64140500 | 3.13808300  | 1.15318300  |
| C                                     | 5.80312100  | 2.86235600  | 1.25168800  |
| S                                     | 4.04433700  | 3.16086300  | -0.56863600 |
| H                                     | 6.62985400  | 3.05103300  | 1.93087400  |
| S                                     | 7.12001500  | -1.98257000 | -0.68377000 |
| C                                     | 5.89172900  | 0.25187500  | -1.84044500 |
| H                                     | 6.53269000  | 0.03688100  | -2.70178000 |
| H                                     | 6.31102300  | 1.11586700  | -1.30961600 |
| H                                     | 4.90459700  | 0.54397900  | -2.20962900 |
| C                                     | 5.76732800  | -0.93286800 | -0.94356200 |
| C                                     | 4.94370500  | -2.58873000 | 0.49064200  |
| H                                     | 4.20285900  | -3.08325500 | 1.11162500  |
| C                                     | 6.22205200  | -3.04121800 | 0.35946400  |
| C                                     | 6.85203900  | -4.24259200 | 0.98228200  |
| C                                     | 4.67318300  | -1.37994800 | -0.23539700 |
| C                                     | 3.37071100  | -0.72031800 | -0.20703500 |
| H                                     | 6.11560000  | -4.76431300 | 1.60061400  |
| H                                     | 7.21958800  | -4.94740400 | 0.22725600  |
| H                                     | 7.70023600  | -3.97274700 | 1.62231600  |
| H                                     | 5.19700400  | 5.92323400  | 0.22997800  |
| H                                     | 6.29734300  | 5.24256100  | -0.97447300 |

|   |            |            |            |
|---|------------|------------|------------|
| H | 6.79160400 | 5.33034200 | 0.72447500 |
|---|------------|------------|------------|

| 5-TS <sub>1</sub> |             |             |             |
|-------------------|-------------|-------------|-------------|
| Pt                | -2.29287400 | -0.98550300 | -0.06172300 |
| S                 | 0.51297100  | 2.49411200  | 0.10587500  |
| S                 | 1.71437000  | -1.55569000 | -0.09850600 |
| C                 | -3.03299257 | -1.10047241 | 4.15873420  |
| O                 | -4.14780100 | -1.96825300 | -0.10310000 |
| O                 | -2.32320655 | -0.87018960 | 1.95520562  |
| N                 | -3.14205100 | 0.83061300  | 0.04813400  |
| C                 | -4.45576100 | 1.04680200  | 0.07795100  |
| H                 | -5.07956700 | 0.16030500  | 0.03417400  |
| C                 | -4.99114300 | 2.32331800  | 0.15928000  |
| C                 | -4.12175000 | 3.44104100  | 0.21522000  |
| H                 | -4.52844600 | 4.44509600  | 0.27911800  |
| C                 | -2.76856000 | 3.23048600  | 0.18466700  |
| H                 | -2.07289000 | 4.06301700  | 0.22477100  |
| C                 | -2.25729900 | 1.91318600  | 0.09836700  |
| C                 | -0.92068700 | 1.50621600  | 0.05505100  |
| C                 | -0.65948300 | 0.06778400  | -0.02897700 |
| C                 | 0.70089000  | -0.13860400 | -0.05627800 |
| C                 | 1.50478000  | 1.02808600  | -0.00281100 |
| C                 | 2.87821300  | 0.81471000  | 0.02992900  |
| C                 | 5.83176600  | 5.23004800  | -0.61652000 |
| C                 | 5.26710300  | 3.92751300  | -0.15456100 |
| C                 | 3.88550200  | 1.86209800  | 0.17283200  |
| C                 | 4.93631700  | 1.93865300  | 1.05929600  |
| C                 | 5.24122000  | 0.94300800  | 2.13520400  |
| H                 | 5.54349000  | 1.45543700  | 3.05507300  |
| H                 | 6.06107800  | 0.27671900  | 1.83935700  |
| H                 | 4.37506800  | 0.31502500  | 2.35854500  |
| C                 | -6.11953252 | -2.95026942 | 0.68641588  |
| C                 | -4.81469665 | -2.24654400 | 0.94374560  |
| C                 | -4.43951264 | -1.95852200 | 2.26684140  |
| H                 | -5.12811811 | -2.26732807 | 3.04463767  |
| C                 | -3.27013120 | -1.31824332 | 2.69003328  |
| H                 | -5.92458419 | -3.88342001 | 0.14656592  |
| H                 | -6.74260964 | -2.32619032 | 0.03642060  |
| H                 | -6.66874662 | -3.17406179 | 1.60335569  |
| H                 | -3.85010046 | -1.47710411 | 4.77720639  |
| H                 | -2.10075190 | -1.59674426 | 4.44952540  |
| H                 | -2.89958294 | -0.02969014 | 4.34702692  |
| C                 | -6.46567200 | 2.53290900  | 0.20203400  |
| F                 | -6.87324000 | 3.36041900  | -0.77942900 |
| F                 | -7.14899300 | 1.38560400  | 0.07399400  |
| F                 | -6.85086500 | 3.10441300  | 1.35970100  |
| C                 | 5.71371600  | 3.11851700  | 0.85324700  |
| S                 | 3.85795200  | 3.24367000  | -0.88965400 |
| H                 | 6.58210200  | 3.36585200  | 1.45729500  |
| S                 | 6.88962200  | -1.91050900 | -0.52181000 |
| C                 | 5.67023000  | 0.23475800  | -1.83191100 |
| H                 | 6.27926300  | -0.07913700 | -2.68628500 |
| H                 | 6.12566800  | 1.13602100  | -1.40264400 |
| H                 | 4.67972600  | 0.51232500  | -2.20229800 |
| C                 | 5.54870100  | -0.85885200 | -0.82528500 |
| C                 | 4.72389900  | -2.41403200 | 0.72207800  |
| H                 | 3.98998300  | -2.85582000 | 1.38929700  |
| C                 | 5.99295300  | -2.88954600 | 0.60074800  |
| C                 | 6.62201300  | -4.05085000 | 1.29558100  |
| C                 | 4.45523500  | -1.24121900 | -0.06718200 |
| C                 | 3.16907100  | -0.57591800 | -0.04371100 |
| H                 | 5.88991300  | -4.52508700 | 1.95581600  |
| H                 | 6.97677700  | -4.80649600 | 0.58493200  |
| H                 | 7.47943500  | -3.74391300 | 1.90589700  |
| H                 | 5.11638400  | 6.05066100  | -0.48784600 |
| H                 | 6.11444300  | 5.20040400  | -1.67597700 |

|   |            |            |             |
|---|------------|------------|-------------|
| H | 6.72813600 | 5.46927700 | -0.03675500 |
|---|------------|------------|-------------|

| 5-TS <sub>2</sub> |             |             |             |
|-------------------|-------------|-------------|-------------|
| Pt                | 2.36644000  | 0.96116800  | -0.03772700 |
| S                 | -0.49710300 | -2.46527000 | 0.09082400  |
| S                 | -1.61497400 | 1.58905400  | -0.04579100 |
| C                 | 0.94805500  | 4.99624500  | -0.21362900 |
| O                 | 4.22336900  | 1.93479700  | -0.07970400 |
| O                 | 1.37440500  | 2.71104300  | -0.11648100 |
| N                 | 3.19650100  | -0.87595100 | 0.03847800  |
| C                 | 4.51325800  | -1.09905100 | 0.05071500  |
| H                 | 5.13981600  | -0.21427500 | 0.01729700  |
| C                 | 5.03562100  | -2.37959600 | 0.09928400  |
| C                 | 4.15467800  | -3.47041600 | 0.13802400  |
| H                 | 4.54336100  | -4.48378600 | 0.17308600  |
| C                 | 2.79585800  | -3.24356500 | 0.12610900  |
| H                 | 2.09200200  | -4.06887700 | 0.15323800  |
| C                 | 2.30934800  | -1.92615900 | 0.07502800  |
| C                 | 0.95757700  | -1.49176100 | 0.05475500  |
| C                 | 0.72808700  | -0.11324000 | -0.00212100 |
| C                 | -0.65341500 | 0.13282400  | -0.02850800 |
| C                 | -1.45250800 | -1.01827200 | 0.01099000  |
| C                 | -2.84042500 | -0.77144300 | 0.06919800  |
| C                 | -6.38892400 | -4.69280100 | -0.49048300 |
| C                 | -5.66415300 | -3.44925300 | -0.10288200 |
| C                 | -3.91211500 | -1.68525200 | 0.26668300  |
| C                 | -5.17505100 | -1.34047600 | 0.84473000  |
| C                 | -5.29486500 | -0.51422900 | 2.09817700  |
| H                 | -5.21501400 | -1.17471300 | 2.97044800  |
| H                 | -6.26540500 | -0.00890000 | 2.14476900  |
| H                 | -4.50589300 | 0.23569600  | 2.17226700  |
| C                 | 5.77544200  | 3.68572000  | -0.15099900 |
| C                 | 4.35165700  | 3.19940900  | -0.13112000 |
| C                 | 3.30472500  | 4.13560300  | -0.16976700 |
| H                 | 3.58817500  | 5.18080500  | -0.21197400 |
| C                 | 1.93354400  | 3.86205600  | -0.16239000 |
| H                 | 6.29008100  | 3.25761000  | -1.01824500 |
| H                 | 6.29292000  | 3.32142600  | 0.74323300  |
| H                 | 5.85071700  | 4.77443000  | -0.19083600 |
| H                 | 1.43346600  | 5.97363300  | -0.24764200 |
| H                 | 0.30962400  | 4.87813700  | -1.09589400 |
| H                 | 0.29563700  | 4.94595900  | 0.66486100  |
| C                 | 6.51106100  | -2.60707000 | 0.13246100  |
| F                 | 6.89210900  | -3.48151500 | -0.81605800 |
| F                 | 7.20224600  | -1.47366600 | -0.05685900 |
| F                 | 6.90490500  | -3.12696300 | 1.30969700  |
| C                 | -6.13401500 | -2.38145300 | 0.59613900  |
| S                 | -3.97471800 | -3.25057200 | -0.51462100 |
| H                 | -7.15032200 | -2.33946100 | 0.97766300  |
| S                 | -7.00428500 | 1.30434500  | -0.30333300 |
| C                 | -5.49460800 | -0.37090600 | -1.91221300 |
| H                 | -5.75062200 | 0.28725500  | -2.75199500 |
| H                 | -6.20765800 | -1.20363800 | -1.89953800 |
| H                 | -4.49758500 | -0.77620400 | -2.09708100 |
| C                 | -5.51951200 | 0.39309700  | -0.61872500 |
| C                 | -4.77148900 | 2.48958700  | 0.27342800  |
| H                 | -4.06700900 | 3.22097900  | 0.65936400  |
| C                 | -6.11922300 | 2.69738600  | 0.29780000  |
| C                 | -6.84998600 | 3.88944700  | 0.80779100  |
| C                 | -4.38035700 | 1.19299400  | -0.16892100 |
| C                 | -3.09771000 | 0.63630700  | -0.04605600 |
| H                 | -5.91679400 | -5.58283300 | -0.05777600 |
| H                 | -6.40507900 | -4.82798700 | -1.57860500 |
| H                 | -7.42312300 | -4.64731900 | -0.13728800 |
| H                 | -7.50261800 | 3.62588800  | 1.64951400  |
| H                 | -7.48591700 | 4.33279800  | 0.03161500  |

|   |             |            |            |
|---|-------------|------------|------------|
| H | -6.14219700 | 4.65121700 | 1.14705900 |
|---|-------------|------------|------------|

|   |             |             |             |
|---|-------------|-------------|-------------|
| H | -7.52608900 | -4.48076900 | -0.53677900 |
|---|-------------|-------------|-------------|

| <b>5-<sup>3</sup>MECP<sub>2</sub></b> |             |             |             |
|---------------------------------------|-------------|-------------|-------------|
| Pt                                    | 2.39017600  | 0.95962100  | -0.03553200 |
| S                                     | -0.48970400 | -2.45644200 | 0.12377600  |
| S                                     | -1.59194700 | 1.58899800  | -0.02683100 |
| C                                     | 0.98469100  | 4.99900700  | -0.24013400 |
| O                                     | 4.24962600  | 1.92589200  | -0.10550300 |
| O                                     | 1.40251000  | 2.71285200  | -0.12159300 |
| N                                     | 3.21341100  | -0.88012300 | 0.04904900  |
| C                                     | 4.52928100  | -1.10863500 | 0.05853000  |
| H                                     | 5.15937400  | -0.22672000 | 0.01742600  |
| C                                     | 5.04659900  | -2.39081500 | 0.11321400  |
| C                                     | 4.16083200  | -3.47757200 | 0.16058300  |
| H                                     | 4.54537800  | -4.49237700 | 0.20052800  |
| C                                     | 2.80306600  | -3.24535900 | 0.15142800  |
| H                                     | 2.09591300  | -4.06756900 | 0.18570100  |
| C                                     | 2.32136700  | -1.92608900 | 0.09486300  |
| C                                     | 0.97160400  | -1.48682700 | 0.07823200  |
| C                                     | 0.74928700  | -0.10871900 | 0.02095700  |
| C                                     | -0.63195700 | 0.14281100  | 0.00616500  |
| C                                     | -1.43999100 | -1.00488400 | 0.04905900  |
| C                                     | -2.82637300 | -0.74587600 | 0.05849400  |
| C                                     | -6.44539300 | -4.60012600 | -0.65517400 |
| C                                     | -5.74653800 | -3.33422400 | -0.29115300 |
| C                                     | -3.94522400 | -1.63273400 | 0.15576500  |
| C                                     | -5.31435000 | -1.09093800 | 0.50071200  |
| C                                     | -5.39784300 | -0.78339000 | 2.00774500  |
| H                                     | -6.40005700 | -0.43274400 | 2.27490500  |
| H                                     | -4.67241200 | -0.01136200 | 2.28349700  |
| H                                     | -5.17664600 | -1.68960800 | 2.57910400  |
| C                                     | 5.80697400  | 3.67033500  | -0.21071900 |
| C                                     | 4.38184500  | 3.18933900  | -0.17105500 |
| C                                     | 3.33781100  | 4.12905700  | -0.20896200 |
| H                                     | 3.62480400  | 5.17264000  | -0.26479600 |
| C                                     | 1.96586100  | 3.86112800  | -0.18544900 |
| H                                     | 6.31022500  | 3.23367200  | -1.08039900 |
| H                                     | 6.33324200  | 3.31099900  | 0.68035100  |
| H                                     | 5.88564700  | 4.75841600  | -0.25994000 |
| H                                     | 1.47391300  | 5.97402900  | -0.28526400 |
| H                                     | 0.34088900  | 4.87672700  | -1.11798900 |
| H                                     | 0.33733200  | 4.95909200  | 0.64261600  |
| C                                     | 6.52089900  | -2.62454000 | 0.14245600  |
| F                                     | 6.89662800  | -3.49852100 | -0.80880800 |
| F                                     | 7.21660200  | -1.49363600 | -0.04604200 |
| F                                     | 6.91555800  | -3.14883900 | 1.31757500  |
| C                                     | -6.27633400 | -2.18343700 | 0.14216700  |
| S                                     | -3.97673400 | -3.27435900 | -0.40703400 |
| H                                     | -7.34597600 | -2.05544100 | 0.28970400  |
| S                                     | -7.04028100 | 1.15926200  | 0.02613400  |
| C                                     | -5.50472800 | -0.10462200 | -1.85563500 |
| H                                     | -6.35075900 | -0.75210800 | -2.10569100 |
| H                                     | -4.57848100 | -0.61926500 | -2.13244300 |
| H                                     | -5.57925500 | 0.81716000  | -2.43907800 |
| C                                     | -5.49253100 | 0.21926600  | -0.35619000 |
| C                                     | -4.79970300 | 2.48255400  | 0.25301700  |
| H                                     | -4.11775800 | 3.30337800  | 0.45894700  |
| C                                     | -6.16791000 | 2.64449400  | 0.32996400  |
| C                                     | -6.91009400 | 3.89037700  | 0.66208800  |
| C                                     | -4.37092800 | 1.18376700  | -0.03020000 |
| C                                     | -3.06059100 | 0.64784300  | 0.00189900  |
| H                                     | -6.21100200 | 4.70796600  | 0.86063400  |
| H                                     | -7.57083200 | 4.19594400  | -0.15937300 |
| H                                     | -7.54146900 | 3.75459700  | 1.54961300  |
| H                                     | -6.11805800 | -5.43093100 | -0.01908500 |
| H                                     | -6.24080600 | -4.88274500 | -1.69452100 |



**6-1GSo**

|    |             |             |             |
|----|-------------|-------------|-------------|
| Pt | -3.00562000 | -1.03834700 | -0.09784000 |
| S  | -0.19445300 | 2.42733000  | 0.18935400  |
| S  | 0.98713400  | -1.61523400 | -0.25553900 |
| C  | -1.57179300 | -5.05408800 | -0.50828500 |
| O  | -4.85737200 | -2.01514400 | -0.15394700 |
| O  | -2.00061700 | -2.77833500 | -0.28629500 |
| N  | -3.85237600 | 0.77455300  | 0.09537900  |
| C  | -5.16482400 | 0.98839300  | 0.15041900  |
| H  | -5.79001900 | 0.10469700  | 0.07738300  |
| C  | -5.69711800 | 2.26174600  | 0.29827800  |
| C  | -4.82748300 | 3.37141300  | 0.39148300  |
| H  | -5.23160500 | 4.37128800  | 0.51198600  |
| C  | -3.47322500 | 3.16285800  | 0.33487200  |
| H  | -2.77649100 | 3.99213900  | 0.40620300  |
| C  | -2.96722200 | 1.84989000  | 0.18375700  |
| C  | -1.63122300 | 1.44523700  | 0.10957500  |
| C  | -1.37283700 | 0.00889000  | -0.04470600 |
| C  | -0.01706300 | -0.19833000 | -0.10859200 |
| C  | 0.79061800  | 0.96613600  | -0.00955100 |
| C  | 2.15868700  | 0.74817700  | -0.01393200 |
| C  | 2.44751900  | -0.64103800 | -0.17643400 |
| C  | 5.10787700  | 5.16391900  | -0.30750000 |
| C  | 4.54216900  | 3.82964000  | 0.03062900  |
| C  | 3.16974300  | 1.78110800  | 0.20137000  |
| C  | 4.19998400  | 1.79518900  | 1.11901800  |
| C  | 4.47199300  | 0.73298100  | 2.13797000  |
| H  | 4.77036800  | 1.18423800  | 3.08984200  |
| H  | 5.28381700  | 0.07077000  | 1.81333600  |
| H  | 3.59049200  | 0.11137600  | 2.31341200  |
| C  | 4.97568700  | 0.27857200  | -1.88078500 |
| H  | 5.61126200  | 0.02940900  | -2.73682800 |
| H  | 5.41591500  | 1.15145000  | -1.38338500 |
| H  | 3.99373400  | 0.57466200  | -2.25842800 |
| C  | 4.87242500  | -0.89208100 | -0.95532400 |
| C  | 3.73029200  | -1.27763800 | -0.26005100 |
| C  | 5.61712400  | -2.86117300 | 0.05260500  |
| C  | 6.50184600  | -3.99868700 | 0.41956000  |
| C  | -6.39975100 | -3.77002200 | -0.28010000 |
| C  | -4.97876500 | -3.27777600 | -0.26495400 |
| C  | -3.92876900 | -4.20471300 | -0.37043300 |
| H  | -4.20949000 | -5.24767500 | -0.45802600 |
| C  | -2.55798800 | -3.92773000 | -0.37820700 |
| H  | -6.93410700 | -3.30076600 | -1.11345800 |
| H  | -6.89958700 | -3.45401400 | 0.64209500  |
| H  | -6.47116800 | -4.85554600 | -0.37366100 |
| H  | -2.05530900 | -6.03091200 | -0.56949500 |
| H  | -0.96182000 | -4.89594200 | -1.40435300 |
| H  | -0.89186000 | -5.03869000 | 0.35027700  |
| C  | -7.17487500 | 2.46961900  | 0.32418700  |
| F  | -7.61135400 | 3.06167900  | -0.80307200 |
| F  | -7.84600900 | 1.31600500  | 0.45550300  |
| F  | -7.53500800 | 3.27281300  | 1.34101900  |
| C  | 4.98304200  | 2.97933300  | 1.00399000  |
| C  | 5.94035600  | -1.80405800 | -0.75253600 |
| S  | 3.15726800  | 3.21208500  | -0.78338500 |
| S  | 3.99201000  | -2.77139100 | 0.61391400  |
| H  | 5.83820500  | 3.19773000  | 1.63414300  |
| H  | 6.91441400  | -1.69757900 | -1.21720400 |
| H  | 6.03882875  | 5.31838728  | 0.19684948  |
| H  | 5.28197207  | 5.26795655  | -1.35810321 |
| H  | 4.45235525  | 5.96161016  | -0.02664408 |

**6-1GSc**

|    |             |             |             |
|----|-------------|-------------|-------------|
| H  | 6.10682222  | -4.93694508 | 0.09012414  |
| H  | 6.63347749  | -4.08004022 | 1.47831153  |
| H  | 7.47052624  | -3.88081622 | -0.01937630 |
| Pt | 2.39017600  | 0.95962100  | -0.03553200 |
| S  | -0.48970400 | -2.45644200 | 0.12377600  |
| S  | -1.59194700 | 1.58899800  | -0.02683100 |
| C  | 0.98469100  | 4.99900700  | -0.24013400 |
| O  | 4.24962600  | 1.92589200  | -0.10550300 |
| O  | 1.40251000  | 2.71285200  | -0.12159300 |
| N  | 3.21341100  | -0.88012300 | 0.04904900  |
| C  | 4.52928100  | -1.10863500 | 0.05853000  |
| H  | 5.15937400  | -0.22672000 | 0.01742600  |
| C  | 5.04659900  | -2.39081500 | 0.11321400  |
| C  | 4.16083200  | -3.47757200 | 0.16058300  |
| H  | 4.54537800  | -4.49237700 | 0.20052800  |
| C  | 2.80306600  | -3.24535900 | 0.15142800  |
| H  | 2.09591300  | -4.06756900 | 0.18570100  |
| C  | 2.32136700  | -1.92608900 | 0.09486300  |
| C  | 0.97160400  | -1.48682700 | 0.07823200  |
| C  | 0.74928700  | -0.10871900 | 0.02095700  |
| C  | -0.63195700 | 0.14281100  | 0.00616500  |
| C  | -1.43999100 | -1.00488400 | 0.04905900  |
| C  | -2.82637300 | -0.74587600 | 0.05849400  |
| C  | -6.44539300 | -4.60012600 | -0.65517400 |
| C  | -5.74653800 | -3.33422400 | -0.29115300 |
| C  | -3.94522400 | -1.63273400 | 0.15576500  |
| C  | -5.31435000 | -1.09093800 | 0.50071200  |
| C  | -5.39784300 | -0.78339000 | 2.00774500  |
| H  | -6.40005700 | -0.43274400 | 2.27490500  |
| H  | -4.67241200 | -0.01136200 | 2.28349700  |
| H  | -5.17664600 | -1.68960800 | 2.57910400  |
| C  | 5.80697400  | 3.67033500  | -0.21071900 |
| C  | 4.38184500  | 3.18933900  | -0.17105500 |
| C  | 3.33781100  | 4.12905700  | -0.20896200 |
| H  | 3.62480400  | 5.17264000  | -0.26479600 |
| C  | 1.96586100  | 3.86112800  | -0.18544900 |
| H  | 6.31022500  | 3.23367200  | -1.08039900 |
| H  | 6.33324200  | 3.31099900  | 0.68035100  |
| H  | 5.88564700  | 4.75841600  | -0.25994000 |
| H  | 1.47391300  | 5.97402900  | -0.28526400 |
| H  | 0.34088900  | 4.87672700  | -1.11798900 |
| H  | 0.33733200  | 4.95909200  | 0.64261600  |
| C  | 6.52089900  | -2.62454000 | 0.14245600  |
| F  | 6.89662800  | -3.49852100 | -0.80880800 |
| F  | 7.21660200  | -1.49363600 | -0.04604200 |
| F  | 6.91555800  | -3.14883900 | 1.31757500  |
| C  | -6.27633400 | -2.18343700 | 0.14216700  |
| S  | -3.97673400 | -3.27435900 | -0.40703400 |
| H  | -7.34597600 | -2.05544100 | 0.28970400  |
| S  | -7.04028100 | 1.15926200  | 0.02613400  |
| C  | -5.50472800 | -0.10462200 | -1.85563500 |
| H  | -6.35075900 | -0.75210800 | -2.10569100 |
| H  | -4.57848100 | -0.61926500 | -2.13244300 |
| H  | -5.57925500 | 0.81716000  | -2.43907800 |
| C  | -5.49253100 | 0.21926600  | -0.35619000 |
| C  | -4.79970300 | 2.48255400  | 0.25301700  |
| H  | -4.11775800 | 3.30337800  | 0.45894700  |
| C  | -6.16791000 | 2.64449400  | 0.32996400  |
| C  | -6.91009400 | 3.89037700  | 0.66208800  |
| C  | -4.37092800 | 1.18376700  | -0.03020000 |
| C  | -3.06059100 | 0.64784300  | 0.00189900  |
| H  | -6.21100200 | 4.70796600  | 0.86063400  |
| H  | -7.57083200 | 4.19594400  | -0.15937300 |
| H  | -7.54146900 | 3.75459700  | 1.54961300  |

|   |             |             |             |
|---|-------------|-------------|-------------|
| H | -6.11805800 | -5.43093100 | -0.01908500 |
| H | -6.24080600 | -4.88274500 | -1.69452100 |
| H | -7.52608900 | -4.48076900 | -0.53677900 |

**6-3ESo**

|    |             |             |             |
|----|-------------|-------------|-------------|
| Pt | -2.26064900 | -0.97778600 | -0.06739000 |
| S  | 0.54064600  | 2.51211100  | 0.05051900  |
| S  | 1.73859800  | -1.54190100 | -0.15937800 |
| C  | -0.81166700 | -5.00358200 | -0.30422600 |
| O  | -4.11152200 | -1.96863300 | -0.06325700 |
| O  | -1.25089700 | -2.72208800 | -0.18493400 |
| N  | -3.11201600 | 0.83832200  | 0.04266200  |
| C  | -4.42561100 | 1.05088700  | 0.09142200  |
| H  | -5.04725700 | 0.16215200  | 0.06402500  |
| C  | -4.96323800 | 2.32660700  | 0.17709100  |
| C  | -4.09589900 | 3.44419000  | 0.21327400  |
| H  | -4.50304400 | 4.44756800  | 0.28528000  |
| C  | -2.74188300 | 3.23673200  | 0.16313000  |
| H  | -2.04780300 | 4.07095300  | 0.19196700  |
| C  | -2.22986900 | 1.92062100  | 0.07464800  |
| C  | -0.89145300 | 1.51645300  | 0.01510200  |
| C  | -0.62850300 | 0.08410900  | -0.06719900 |
| C  | 0.72783100  | -0.12124100 | -0.10907400 |
| C  | 1.53389000  | 1.05093900  | -0.06468700 |
| C  | 2.90145800  | 0.84226500  | -0.03454000 |
| C  | 3.19948100  | -0.55691000 | -0.11959500 |
| C  | 5.84693200  | 5.28134500  | -0.53410900 |
| C  | 5.27847800  | 3.96736000  | -0.11092000 |
| C  | 3.90392400  | 1.88767900  | 0.14056900  |
| C  | 4.93059900  | 1.95380100  | 1.05636900  |
| C  | 5.21422700  | 0.94055400  | 2.12180700  |
| H  | 5.50183000  | 1.43766100  | 3.05458700  |
| H  | 6.03771000  | 0.27732700  | 1.82879300  |
| H  | 4.34346100  | 0.31104400  | 2.32157800  |
| C  | 5.77424300  | 0.31238500  | -1.79265100 |
| H  | 6.43255600  | 0.03384400  | -2.62267000 |
| H  | 6.20204500  | 1.19997100  | -1.31004500 |
| H  | 4.80459500  | 0.60184600  | -2.20526900 |
| C  | 5.64178400  | -0.82938900 | -0.83534100 |
| C  | 4.47888300  | -1.19192000 | -0.16076300 |
| C  | 6.38106900  | -2.78914900 | 0.23862100  |
| C  | 7.25221000  | -3.91698500 | 0.67881000  |
| C  | -5.64499500 | -3.73579000 | -0.09764000 |
| C  | -4.22635200 | -3.23431900 | -0.11663300 |
| C  | -3.17198400 | -4.16026900 | -0.18915900 |
| H  | -3.44764500 | -5.20767700 | -0.22780500 |
| C  | -1.80273600 | -3.87620300 | -0.21971800 |
| H  | -6.19049500 | -3.30427000 | -0.94405200 |
| H  | -6.13805900 | -3.38548100 | 0.81581400  |
| H  | -5.71055100 | -4.82477600 | -0.14597000 |
| H  | -1.29122400 | -5.98414600 | -0.32828300 |
| H  | -0.19981200 | -4.87758700 | -1.20402600 |
| H  | -0.13386200 | -4.95229100 | 0.55473300  |
| C  | -6.43921000 | 2.53167900  | 0.20161700  |
| F  | -6.88049600 | 3.11273400  | -0.93113500 |
| F  | -7.11120300 | 1.37945800  | 0.34605300  |
| F  | -6.80357500 | 3.34634000  | 1.20973900  |
| C  | 5.70426300  | 3.14232300  | 0.89321400  |
| C  | 6.70276800  | -1.73932700 | -0.58136100 |
| S  | 3.89345800  | 3.28895600  | -0.89505400 |
| S  | 4.73125500  | -2.67371400 | 0.74592600  |
| H  | 6.55423600  | 3.38415600  | 1.52502300  |
| H  | 7.68726100  | -1.63311800 | -1.02838000 |
| H  | 6.72437200  | 5.51683200  | 0.07541300  |
| H  | 6.15734400  | 5.27156000  | -1.58535400 |
| H  | 5.12212600  | 6.09472900  | -0.41257200 |

|   |            |             |            |
|---|------------|-------------|------------|
| H | 6.84604700 | -4.88691800 | 0.36845400 |
| H | 7.36491800 | -3.94263500 | 1.76922500 |
| H | 8.24767400 | -3.80903900 | 0.23827400 |

**6-3ESc**

|    |             |             |             |
|----|-------------|-------------|-------------|
| Pt | 2.35770600  | 0.94981900  | -0.03702600 |
| S  | -0.50364000 | -2.48848400 | 0.11428100  |
| S  | -1.61797000 | 1.56185700  | -0.05628700 |
| C  | 0.92544900  | 4.98030000  | -0.25319900 |
| O  | 4.21162100  | 1.92952400  | -0.09236000 |
| O  | 1.35846200  | 2.69694200  | -0.13252900 |
| N  | 3.19092500  | -0.88379800 | 0.05797800  |
| C  | 4.50703400  | -1.10543700 | 0.08138400  |
| H  | 5.13283800  | -0.22015000 | 0.04422300  |
| C  | 5.03217500  | -2.38405800 | 0.15386500  |
| C  | 4.15158900  | -3.47691700 | 0.20086100  |
| H  | 4.54245800  | -4.48813400 | 0.26277400  |
| C  | 2.79362500  | -3.25356000 | 0.17472200  |
| H  | 2.09124500  | -4.07975800 | 0.21314700  |
| C  | 2.30233200  | -1.93662200 | 0.10164700  |
| C  | 0.95365300  | -1.50749900 | 0.07118200  |
| C  | 0.72134000  | -0.12634900 | 0.00706200  |
| C  | -0.65399100 | 0.11712000  | -0.01800200 |
| C  | -1.46510100 | -1.03958400 | 0.02459000  |
| C  | -2.84031200 | -0.79341700 | 0.02268100  |
| C  | -3.08865100 | 0.61258500  | -0.03971000 |
| C  | -6.47332200 | -4.64331400 | -0.65425900 |
| C  | -5.76762700 | -3.37978700 | -0.29478500 |
| C  | -3.96263700 | -1.68183700 | 0.13322600  |
| C  | -5.32021400 | -1.14345400 | 0.51321300  |
| C  | -5.38446300 | -0.82167100 | 2.01840900  |
| H  | -6.38161900 | -0.45794000 | 2.29076100  |
| H  | -4.65301000 | -0.04928900 | 2.27751000  |
| H  | -5.16500900 | -1.71981100 | 2.60305100  |
| C  | -5.64364200 | -0.14963900 | -1.82595800 |
| H  | -6.52564400 | -0.76650200 | -2.02825400 |
| H  | -4.75287200 | -0.69705700 | -2.15028000 |
| H  | -5.71889900 | 0.77325800  | -2.40902700 |
| C  | -5.55639500 | 0.18219300  | -0.32227800 |
| C  | -4.38468600 | 1.10876400  | -0.07855100 |
| C  | -6.58374200 | 2.27021200  | 0.31893800  |
| C  | -7.59589100 | 3.31782700  | 0.63506600  |
| C  | 5.75659600  | 3.68532600  | -0.18744700 |
| C  | 4.33459500  | 3.19375600  | -0.15793300 |
| C  | 3.28434200  | 4.12619800  | -0.20437600 |
| H  | 3.56457600  | 5.17174600  | -0.25828400 |
| C  | 1.91386700  | 3.84908600  | -0.19155800 |
| H  | 6.26860500  | 3.25378200  | -1.05459300 |
| H  | 6.27971100  | 3.32826600  | 0.70637800  |
| H  | 5.82775800  | 4.77405000  | -0.23452200 |
| H  | 1.40844700  | 5.95844900  | -0.29851300 |
| H  | 0.28585300  | 4.85166900  | -1.13316800 |
| H  | 0.27426200  | 4.93829200  | 0.62664200  |
| C  | 6.50733700  | -2.60721300 | 0.14782600  |
| F  | 6.92706600  | -3.13902500 | -1.01607400 |
| F  | 7.19214100  | -1.46865400 | 0.33428300  |
| F  | 6.87611200  | -3.46919100 | 1.11307500  |
| C  | -6.28684300 | -2.23891700 | 0.17774500  |
| C  | -6.77089400 | 0.96876000  | 0.07129100  |
| S  | -4.00488500 | -3.30633400 | -0.47062200 |
| S  | -4.87337700 | 2.74723000  | 0.21587000  |
| H  | -7.35145400 | -2.12628200 | 0.36716800  |
| H  | -7.75986800 | 0.51802400  | 0.06240300  |
| H  | -6.30776700 | -4.90625000 | -1.70565800 |
| H  | -6.11720700 | -5.48341300 | -0.04655000 |
| H  | -7.54938400 | -4.53308100 | -0.49227700 |

|   |             |            |             |
|---|-------------|------------|-------------|
| H | -8.59680300 | 2.87764800 | 0.65855100  |
| H | -7.58859400 | 4.11632500 | -0.11627700 |
| H | -7.39892600 | 3.78154400 | 1.60879400  |

**6-<sup>3</sup>MC**

|    |             |             |             |
|----|-------------|-------------|-------------|
| Pt | -1.90705662 | -1.43656047 | -0.59316504 |
| S  | 0.83929038  | 2.08415853  | 0.09853196  |
| S  | 2.12683638  | -1.83641947 | -0.46938704 |
| C  | -3.85996100 | -2.01263700 | 3.44678600  |
| O  | -3.81024800 | -2.45390100 | -1.04193300 |
| O  | -2.56593900 | -1.60641500 | 1.55032300  |
| N  | -2.85923462 | 0.58106453  | -0.32298404 |
| C  | -4.15913162 | 0.84602653  | -0.29143204 |
| H  | -4.82573362 | 0.00572553  | -0.45652104 |
| C  | -4.63544162 | 2.12629853  | -0.04989104 |
| C  | -3.70673362 | 3.15286453  | 0.15708596  |
| H  | -4.04946362 | 4.16605753  | 0.34611596  |
| C  | -2.35610462 | 2.86900653  | 0.12578196  |
| H  | -1.62184662 | 3.65102153  | 0.29031796  |
| C  | -1.93370862 | 1.54935853  | -0.11246104 |
| C  | -0.57771062 | 1.07825753  | -0.14805404 |
| C  | -0.30385362 | -0.26902347 | -0.35958104 |
| C  | 1.09675238  | -0.45548547 | -0.32225904 |
| C  | 1.85046738  | 0.69270053  | -0.09223104 |
| C  | 3.25818738  | 0.48080053  | -0.00766104 |
| C  | 6.12976838  | 5.00055053  | 0.04955896  |
| C  | 5.57690438  | 3.63939753  | 0.31639196  |
| C  | 4.23124538  | 1.52195853  | 0.31388096  |
| C  | 5.22911938  | 1.51269253  | 1.26162996  |
| C  | 5.49660438  | 0.39688653  | 2.22252696  |
| H  | 5.77482138  | 0.79381253  | 3.20490696  |
| H  | 6.31770038  | -0.24201347 | 1.87413796  |
| H  | 4.61792638  | -0.24252447 | 2.34221496  |
| C  | -5.88348700 | -3.52019600 | -0.85123800 |
| C  | -4.71555000 | -2.80590500 | -0.22082700 |
| C  | -4.71753700 | -2.60281100 | 1.16752800  |
| H  | -5.59206000 | -2.95024800 | 1.70518800  |
| C  | -3.68092600 | -2.06464000 | 1.94854200  |
| H  | -5.53232900 | -4.46312900 | -1.28544800 |
| H  | -6.27799500 | -2.91524600 | -1.67432400 |
| H  | -6.68420500 | -3.73399900 | -0.13995300 |
| H  | -4.82197900 | -2.41568900 | 3.77097500  |
| H  | -3.05240700 | -2.57718600 | 3.92464200  |
| H  | -3.76970200 | -0.97397300 | 3.78219300  |
| C  | -6.10047762 | 2.41873153  | -0.01552904 |
| F  | -6.45582762 | 3.26965153  | -0.99409704 |
| F  | -6.83821962 | 1.30786753  | -0.15796204 |
| F  | -6.45637162 | 2.99862853  | 1.14428196  |
| C  | 5.98815438  | 2.72290153  | 1.24278696  |
| S  | 4.22937038  | 3.02140853  | -0.57753704 |
| H  | 6.81488738  | 2.91157853  | 1.92197296  |
| S  | 4.60837621  | -3.16810267 | 0.70637229  |
| C  | 6.91093515  | -4.60457858 | 1.39491226  |
| H  | 6.26931348  | -5.48728158 | 1.30486532  |
| H  | 7.06609433  | -4.40228468 | 2.46218536  |
| H  | 7.88716269  | -4.84244323 | 0.96311212  |
| C  | 6.32064524  | -3.42723393 | 0.69569263  |
| C  | 6.02419433  | -1.48741277 | -0.57960564 |
| C  | 3.55574438  | -0.85977247 | -0.21593604 |
| H  | 5.38203738  | 5.78377953  | 0.22107696  |
| H  | 6.48237638  | 5.10310653  | -0.98337404 |
| H  | 6.97663738  | 5.19088753  | 0.71557396  |
| C  | 6.46909474  | -0.27385877 | -1.41683338 |
| H  | 7.34524398  | 0.15851501  | -0.98058181 |
| H  | 6.68686751  | -0.59010792 | -2.41556332 |
| H  | 5.68429169  | 0.45319991  | -1.43606493 |

|   |            |             |             |
|---|------------|-------------|-------------|
| C | 4.72082675 | -1.73786239 | -0.27198241 |
| C | 6.94928870 | -2.43419317 | -0.02347976 |
| H | 8.01489750 | -2.36151363 | -0.08747643 |

**6-<sup>3</sup>MECP<sub>1</sub>**

|    |             |             |             |
|----|-------------|-------------|-------------|
| Pt | -1.90705662 | -1.43656047 | -0.59316504 |
| S  | 0.83929038  | 2.08415853  | 0.09853196  |
| S  | 2.12683638  | -1.83641947 | -0.46938704 |
| C  | -3.33247659 | -2.98403297 | 3.41188313  |
| O  | -3.81024800 | -2.45390100 | -1.04193300 |
| O  | -2.29432884 | -2.10118951 | 1.52008033  |
| N  | -2.85923462 | 0.58106453  | -0.32298404 |
| C  | -4.15913162 | 0.84602653  | -0.29143204 |
| H  | -4.82573362 | 0.00572553  | -0.45652104 |
| C  | -4.63544162 | 2.12629853  | -0.04989104 |
| C  | -3.70673362 | 3.15286453  | 0.15708596  |
| H  | -4.04946362 | 4.16605753  | 0.34611596  |
| C  | -2.35610462 | 2.86900653  | 0.12578196  |
| H  | -1.62184662 | 3.65102153  | 0.29031796  |
| C  | -1.93370862 | 1.54935853  | -0.11246104 |
| C  | -0.57771062 | 1.07825753  | -0.14805404 |
| C  | -0.30385362 | -0.26902347 | -0.35958104 |
| C  | 1.09675238  | -0.45548547 | -0.32225904 |
| C  | 1.85046738  | 0.69270053  | -0.09223104 |
| C  | 3.25818738  | 0.48080053  | -0.00766104 |
| C  | 6.12976838  | 5.00055053  | 0.04955896  |
| C  | 5.57690438  | 3.63939753  | 0.31639196  |
| C  | 4.23124538  | 1.52195853  | 0.31388096  |
| C  | 5.22911938  | 1.51269253  | 1.26162996  |
| C  | 5.49660438  | 0.39688653  | 2.22252696  |
| H  | 5.77482138  | 0.79381253  | 3.20490696  |
| H  | 6.31770038  | -0.24201347 | 1.87413796  |
| H  | 4.61792638  | -0.24252447 | 2.34221496  |
| C  | -5.80273882 | -3.66615561 | -0.86279991 |
| C  | -4.59522358 | -3.02982343 | -0.22350750 |
| C  | -4.43671933 | -3.12799870 | 1.16718252  |
| H  | -5.22569045 | -3.63706709 | 1.70843585  |
| C  | -3.33447068 | -2.70384773 | 1.92831137  |
| H  | -5.47094616 | -4.47048836 | -1.52908466 |
| H  | -6.31695775 | -2.92598795 | -1.48473428 |
| H  | -6.50257884 | -4.07726426 | -0.13204619 |
| H  | -4.23197383 | -3.50737381 | 3.74361666  |
| H  | -2.45194549 | -3.58489148 | 3.66256105  |
| H  | -3.24207077 | -2.03718930 | 3.95482080  |
| C  | -6.10047762 | 2.41873153  | -0.01552904 |
| F  | -6.45582762 | 3.26965153  | -0.99409704 |
| F  | -6.83821962 | 1.30786753  | -0.15796204 |
| F  | -6.45637162 | 2.99862853  | 1.14428196  |
| C  | 5.98815438  | 2.72290153  | 1.24278696  |
| S  | 4.22937038  | 3.02140853  | -0.57753704 |
| H  | 6.81488738  | 2.91157853  | 1.92197296  |
| S  | 4.60837621  | -3.16810267 | 0.70637229  |
| C  | 6.91093515  | -4.60457858 | 1.39491226  |
| H  | 6.26931348  | -5.48728158 | 1.30486532  |
| H  | 7.06609433  | -4.40228468 | 2.46218536  |
| H  | 7.88716269  | -4.84244323 | 0.96311212  |
| C  | 6.32064524  | -3.42723393 | 0.69569263  |
| C  | 6.02419433  | -1.48741277 | -0.57960564 |
| C  | 3.55574438  | -0.85977247 | -0.21593604 |
| H  | 5.38203738  | 5.78377953  | 0.22107696  |
| H  | 6.48237638  | 5.10310653  | -0.98337404 |
| H  | 6.97663738  | 5.19088753  | 0.71557396  |
| C  | 6.46909474  | -0.27385877 | -1.41683338 |
| H  | 7.34524398  | 0.15851501  | -0.98058181 |
| H  | 6.68686751  | -0.59010792 | -2.41556332 |
| H  | 5.68429169  | 0.45319991  | -1.43606493 |

|   |            |             |             |
|---|------------|-------------|-------------|
| C | 4.72082675 | -1.73786239 | -0.27198241 |
| C | 6.94928870 | -2.43419317 | -0.02347976 |
| H | 8.01489750 | -2.36151363 | -0.08747643 |

|   |            |             |             |
|---|------------|-------------|-------------|
| C | 4.72082675 | -1.73786239 | -0.27198241 |
| C | 6.94928870 | -2.43419317 | -0.02347976 |
| H | 8.01489750 | -2.36151363 | -0.08747643 |

**6-TS<sub>1</sub>**

|    |             |             |             |
|----|-------------|-------------|-------------|
| Pt | -1.90705662 | -1.43656047 | -0.59316504 |
| S  | 0.83929038  | 2.08415853  | 0.09853196  |
| S  | 2.12683638  | -1.83641947 | -0.46938704 |
| C  | -3.76646744 | -2.19380094 | 3.46097881  |
| O  | -3.81024800 | -2.45390100 | -1.04193300 |
| O  | -2.51766884 | -1.69890608 | 1.55528674  |
| N  | -2.85923462 | 0.58106453  | -0.32298404 |
| C  | -4.15913162 | 0.84602653  | -0.29143204 |
| H  | -4.82573362 | 0.00572553  | -0.45652104 |
| C  | -4.63544162 | 2.12629853  | -0.04989104 |
| C  | -3.70673362 | 3.15286453  | 0.15708596  |
| H  | -4.04946362 | 4.16605753  | 0.34611596  |
| C  | -2.35610462 | 2.86900653  | 0.12578196  |
| H  | -1.62184662 | 3.65102153  | 0.29031796  |
| C  | -1.93370862 | 1.54935853  | -0.11246104 |
| C  | -0.57771062 | 1.07825753  | -0.14805404 |
| C  | -0.30385362 | -0.26902347 | -0.35958104 |
| C  | 1.09675238  | -0.45548547 | -0.32225904 |
| C  | 1.85046738  | 0.69270053  | -0.09223104 |
| C  | 3.25818738  | 0.48080053  | -0.00766104 |
| C  | 6.12976838  | 5.00055053  | 0.04955896  |
| C  | 5.57690438  | 3.63939753  | 0.31369196  |
| C  | 4.23124538  | 1.52195853  | 0.31388096  |
| C  | 5.22911938  | 1.51269253  | 1.26162996  |
| C  | 5.49660438  | 0.39688653  | 2.22252696  |
| H  | 5.77482138  | 0.79381253  | 3.20490696  |
| H  | 6.31770038  | -0.24201347 | 1.87413796  |
| H  | 4.61792638  | -0.24252447 | 2.34221496  |
| C  | -5.86910956 | -3.54752690 | -0.85025350 |
| C  | -4.69427829 | -2.84757235 | -0.21658040 |
| C  | -4.66795515 | -2.70043622 | 1.17856790  |
| H  | -5.52741174 | -3.07785408 | 1.72029787  |
| C  | -3.61954708 | -2.18380382 | 1.95837860  |
| H  | -5.51893386 | -4.46872559 | -1.32956852 |
| H  | -6.28686442 | -2.91395206 | -1.63964277 |
| H  | -6.65222201 | -3.79766617 | -0.13125933 |
| H  | -4.71752664 | -2.61908068 | 3.78908183  |
| H  | -2.94364415 | -2.76904197 | 3.89831733  |
| H  | -3.67836145 | -1.16860205 | 3.83604148  |
| C  | -6.10047762 | 2.41873153  | -0.01552904 |
| F  | -6.45582762 | 3.26965153  | -0.99409704 |
| F  | -6.83821962 | 1.30786753  | -0.15796204 |
| F  | -6.45637162 | 2.99862853  | 1.14428196  |
| C  | 5.98815438  | 2.72290153  | 1.24278696  |
| C  | 4.22937038  | 3.02140853  | -0.57753704 |
| H  | 6.81488738  | 2.91157853  | 1.92197296  |
| S  | 4.60837621  | -3.16810267 | 0.70637229  |
| C  | 6.91093515  | -4.60457858 | 1.39491226  |
| H  | 6.26931348  | -5.48728158 | 1.30486532  |
| H  | 7.06609433  | -4.40228468 | 2.46218536  |
| H  | 7.88716269  | -4.84244323 | 0.96311212  |
| C  | 6.32064524  | -3.42723393 | 0.69569263  |
| C  | 6.02419433  | -1.48741277 | -0.57960564 |
| C  | 3.55574438  | -0.85977247 | -0.21593604 |
| H  | 5.38203738  | 5.78377953  | 0.22107696  |
| H  | 6.48237638  | 5.10310653  | -0.98337404 |
| H  | 6.97663738  | 5.19088753  | 0.71557396  |
| C  | 6.46909474  | -0.27385877 | -1.41683338 |
| H  | 7.34524398  | 0.15851501  | -0.98058181 |
| H  | 6.68686751  | -0.59010792 | -2.41556332 |
| H  | 5.68429169  | 0.45319991  | -1.43606493 |

**6-TS<sub>2</sub>**

|    |             |             |             |
|----|-------------|-------------|-------------|
| Pt | 2.34595300  | 0.95134700  | -0.04831600 |
| S  | -0.51191500 | -2.48074800 | 0.05886600  |
| S  | -1.63193700 | 1.57172700  | -0.10040900 |
| C  | 0.91362000  | 4.97920700  | -0.26370100 |
| O  | 4.19937400  | 1.93184100  | -0.06524700 |
| O  | 1.34839100  | 2.69637600  | -0.14946200 |
| N  | 3.17960700  | -0.88334900 | 0.04869500  |
| C  | 4.49634900  | -1.10240600 | 0.08668700  |
| H  | 5.12094400  | -0.21588800 | 0.06051300  |
| C  | 5.02125000  | -2.38096800 | 0.16110400  |
| C  | 4.14298900  | -3.47337500 | 0.19476100  |
| H  | 4.53368000  | -4.48450100 | 0.25863900  |
| C  | 2.78367300  | -3.25060200 | 0.15323600  |
| H  | 2.08149100  | -4.07729800 | 0.18113500  |
| C  | 2.29486000  | -1.93556500 | 0.07843500  |
| C  | 0.94199300  | -1.50473700 | 0.03415300  |
| C  | 0.71104300  | -0.12764800 | -0.03072400 |
| C  | -0.67088200 | 0.11632500  | -0.07159100 |
| C  | -1.46872400 | -1.03561600 | -0.03565100 |
| C  | -2.85751700 | -0.79097100 | 0.00824700  |
| C  | -3.11026200 | 0.61801600  | -0.10663600 |
| C  | -6.44912600 | -4.68350500 | -0.49665800 |
| C  | -5.71727500 | -3.43563700 | -0.13736700 |
| C  | -3.93756000 | -1.69417900 | 0.21059200  |
| C  | -5.21956600 | -1.28950200 | 0.74127000  |
| C  | -5.30195900 | -0.53327300 | 2.04706400  |
| H  | -6.25082100 | 0.00751000  | 2.12743700  |
| H  | -4.48443100 | 0.18220400  | 2.15360500  |
| H  | -5.23820700 | -1.24366800 | 2.87988400  |
| C  | -5.52476800 | -0.40071100 | -1.93555100 |
| H  | -6.26239400 | -1.21068900 | -1.94796100 |
| H  | -4.53968600 | -0.82516500 | -2.13799000 |
| H  | -5.76476200 | 0.29406000  | -2.74976600 |
| C  | -5.55576200 | 0.33478100  | -0.61646100 |
| C  | -4.40055700 | 1.13674400  | -0.21763600 |
| C  | -6.59403100 | 2.28993300  | 0.24057600  |
| C  | -7.62962000 | 3.28307400  | 0.64121100  |
| C  | 5.74501400  | 3.68890300  | -0.12101300 |
| C  | 4.32303100  | 3.19692900  | -0.12107300 |
| C  | 3.27320700  | 4.12856100  | -0.18051400 |
| H  | 3.55310600  | 5.17467900  | -0.22358000 |
| C  | 1.90297200  | 3.84980000  | -0.19228200 |
| H  | 6.27639900  | 3.25442000  | -0.97486500 |
| H  | 6.24818700  | 3.33554500  | 0.78571700  |
| H  | 5.81667400  | 4.77747600  | -0.17010500 |
| H  | 1.39542900  | 5.95846000  | -0.29502700 |
| H  | 0.28896500  | 4.85424200  | -1.15481400 |
| H  | 0.24768900  | 4.93020500  | 0.60461900  |
| C  | 6.49823800  | -2.60209000 | 0.17150300  |
| F  | 6.93146900  | -3.11778400 | -0.99368100 |
| F  | 7.17718400  | -1.46461300 | 0.38107400  |
| F  | 6.85400400  | -3.47486600 | 1.13080100  |
| C  | -6.18728700 | -2.33844800 | 0.50599600  |
| C  | -6.76620300 | 1.05400500  | -0.28664400 |
| S  | -4.01046900 | -3.28200200 | -0.51911700 |
| S  | -4.88613800 | 2.70301800  | 0.40421400  |
| H  | -7.21192300 | -2.27062000 | 0.86132200  |
| H  | -7.75242600 | 0.65493100  | -0.50890900 |
| H  | -6.44694400 | -4.85393400 | -1.58002700 |
| H  | -5.99369500 | -5.56337800 | -0.02693100 |
| H  | -7.48894700 | -4.61645300 | -0.16376000 |

|   |             |            |            |
|---|-------------|------------|------------|
| H | -8.62825000 | 2.88396600 | 0.44063100 |
| H | -7.51724400 | 4.22317500 | 0.08764900 |
| H | -7.56597400 | 3.52449400 | 1.70944300 |

|   |             |            |             |
|---|-------------|------------|-------------|
| H | -8.59680300 | 2.87764800 | 0.65855100  |
| H | -7.58859400 | 4.11632500 | -0.11627700 |
| H | -7.39892600 | 3.78154400 | 1.60879400  |

**6-<sup>3</sup>MECP<sub>2</sub>**

|    |             |             |             |
|----|-------------|-------------|-------------|
| Pt | 2.35770600  | 0.94981900  | -0.03702600 |
| S  | -0.50364000 | -2.48848400 | 0.11428100  |
| S  | -1.61797000 | 1.56185700  | -0.05628700 |
| C  | 0.92544900  | 4.98030000  | -0.25319900 |
| O  | 4.21162100  | 1.92952400  | -0.09236000 |
| O  | 1.35846200  | 2.69694200  | -0.13252900 |
| N  | 3.19092500  | -0.88379800 | 0.05797800  |
| C  | 4.50703400  | -1.10543700 | 0.08138400  |
| H  | 5.13283800  | -0.22015000 | 0.04422300  |
| C  | 5.03217500  | -2.38405800 | 0.15386500  |
| C  | 4.15158900  | -3.47691700 | 0.20086100  |
| H  | 4.54245800  | -4.48813400 | 0.26277400  |
| C  | 2.79362500  | -3.25356000 | 0.17472200  |
| H  | 2.09124500  | -4.07975800 | 0.21314700  |
| C  | 2.30233200  | -1.93662200 | 0.10164700  |
| C  | 0.95365300  | -1.50749900 | 0.07118200  |
| C  | 0.72134000  | -0.12634900 | 0.00706200  |
| C  | -0.65399100 | 0.11712000  | -0.01800200 |
| C  | -1.46510100 | -1.03958400 | 0.02459000  |
| C  | -2.84031200 | -0.79341700 | 0.02268100  |
| C  | -3.08865100 | 0.61258500  | -0.03971000 |
| C  | -6.47332200 | -4.64331400 | -0.65425900 |
| C  | -5.76762700 | -3.37978700 | -0.29478500 |
| C  | -3.96263700 | -1.68183700 | 0.13322600  |
| C  | -5.31907131 | -1.14986776 | 0.51725528  |
| C  | -5.38332031 | -0.82808476 | 2.02245128  |
| H  | -6.38047631 | -0.46435376 | 2.29480328  |
| H  | -4.65186731 | -0.05570276 | 2.28155228  |
| H  | -5.16386631 | -1.72622476 | 2.60709328  |
| C  | -5.64478469 | -0.14322524 | -1.83000028 |
| H  | -6.52678669 | -0.76008824 | -2.03229628 |
| H  | -4.75401469 | -0.69064324 | -2.15432228 |
| H  | -5.72004169 | 0.77967176  | -2.41306928 |
| C  | -5.55753769 | 0.18860676  | -0.32632028 |
| C  | -4.38468600 | 1.10876400  | -0.07855100 |
| C  | -6.58374200 | 2.27021200  | 0.31893800  |
| C  | -7.59589100 | 3.31782700  | 0.63506600  |
| C  | 5.75659600  | 3.68532600  | -0.18744700 |
| C  | 4.33459500  | 3.19375600  | -0.15793300 |
| C  | 3.28434200  | 4.12619800  | -0.20437600 |
| H  | 3.56457600  | 5.17174600  | -0.25828400 |
| C  | 1.91386700  | 3.84908600  | -0.19155800 |
| H  | 6.26860500  | 3.25378200  | -1.05459300 |
| H  | 6.27971100  | 3.32826600  | 0.70637800  |
| H  | 5.82775800  | 4.77405000  | -0.23452200 |
| H  | 1.40844700  | 5.95844900  | -0.29851300 |
| H  | 0.28585300  | 4.85166900  | -1.13316800 |
| H  | 0.27426200  | 4.93829200  | 0.62664200  |
| C  | 6.50733700  | -2.60721300 | 0.14782600  |
| F  | 6.92706600  | -3.13902500 | -1.01607400 |
| F  | 7.19214100  | -1.46865400 | 0.33428300  |
| F  | 6.87611200  | -3.46919100 | 1.11307500  |
| C  | -6.28684300 | -2.23891700 | 0.17774500  |
| C  | -6.77089400 | 0.96876000  | 0.07129100  |
| S  | -4.00488500 | -3.30633400 | -0.47062200 |
| S  | -4.87337700 | 2.74723000  | 0.21587000  |
| H  | -7.35145400 | -2.12626200 | 0.36716800  |
| H  | -7.75986800 | 0.51802400  | 0.06240300  |
| H  | -6.30776700 | -4.90625000 | -1.70565800 |
| H  | -6.11720700 | -5.48341300 | -0.04655000 |
| H  | -7.54938400 | -4.53308100 | -0.49227700 |
